# Supplementary material for: Enantioselective aerobic oxidative cross-dehydrogenative coupling of glycine derivatives with ketones and aldehydes via cooperative photoredox catalysis and organocatalysis
Source: PubMed Central journal article supplement — Chem Sci. 2020 Apr 18;11(18):4741–6. doi: 10.1039/d0sc00683a (PMC8159221; doi:10.1039/d0sc00683a), 2020-04-18
Supplement: SC-011-D0SC00683A-s001.pdf [file SC-011-D0SC00683A-s001.pdf]

## Electronic Supplementary Information

### **Enantioselective aerobic oxidative cross-dehydrogenative coupling of glycine derivatives with ketones and aldehydes via cooperative photoredox catalysis and organocatalysis**

Xiaorong Yang, Zhixiang Xie, Ying Li, and Yuan Zhang\*

State Key Laboratory of Applied Organic Chemistry, College of Chemistry and Chemical Engineering, Lanzhou University, 222 Tianshui South Road, Lanzhou 730000, P. R. China.

\*E-mail: zhangyuan@lzu.edu.cn.

#### **Table of Contents**

|                                                                                  |     |
|----------------------------------------------------------------------------------|-----|
| 1. Optimization of Reaction Conditions                                           | S2  |
| 2. X-ray Crystal Structure for Compound <b>3ae</b>                               | S7  |
| 3. UV/Vis Absorption Spectra                                                     | S8  |
| 4. Experiment Information and Product Data                                       | S8  |
| 5. Transformations of the Products                                               | S26 |
| 6. Synthesis of Compound <b>4b</b>                                               | S27 |
| 7. References                                                                    | S28 |
| 8. Copies of <sup>1</sup> H, <sup>13</sup> C NMR and <sup>19</sup> F NMR Spectra | S29 |
| 9. HPLC Spectra of Products                                                      | S69 |

## 1. Optimization of Reaction Conditions

**Table S1** Screening of Chiral Amine<sup>a</sup>

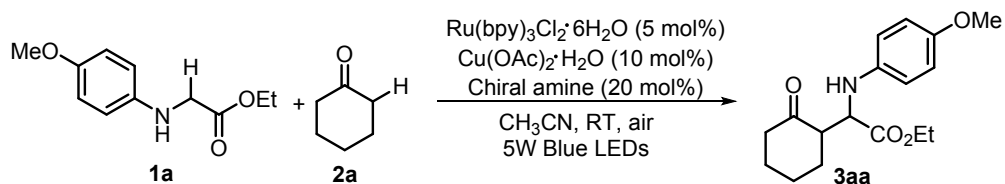

| Entry | Amine    | Yield (%) <sup>b</sup> | dr (anti/syn) <sup>c</sup> | ee (%) <sup>c</sup> |
|-------|----------|------------------------|----------------------------|---------------------|
| 1     | <b>A</b> | 76                     | 97/3                       | 96                  |
| 2     | <b>B</b> | ND                     | -                          | -                   |
| 3     | <b>C</b> | 57                     | 98/2                       | 88                  |
| 4     | <b>D</b> | ND                     | -                          | -                   |
| 5     | <b>E</b> | ND                     | -                          | -                   |
| 6     | <b>F</b> | Trace                  | -                          | -                   |

<sup>a</sup>Reaction conditions: **1a** (0.1 mmol), photocatalyst (5 mol %), Cu(OAc)<sub>2</sub>·H<sub>2</sub>O (10 mol%), CH<sub>3</sub>CN (2 mL), 5 W blue LED light irradiation under air for 2 h, then chiral amine catalyst (20 mol%) and **2a** (0.5 mmol) were added. <sup>b</sup>Isolated yields. <sup>c</sup>The dr and ee values of product was determined by chiral-phase HPLC analysis.

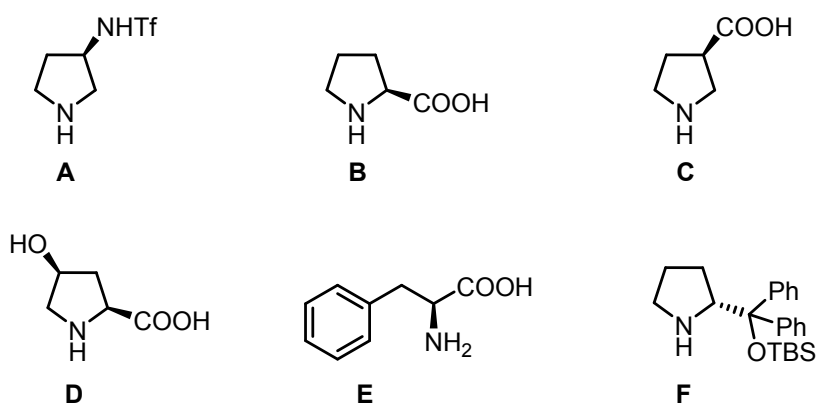

**Table S2** Screening of Photocatalysts<sup>a</sup>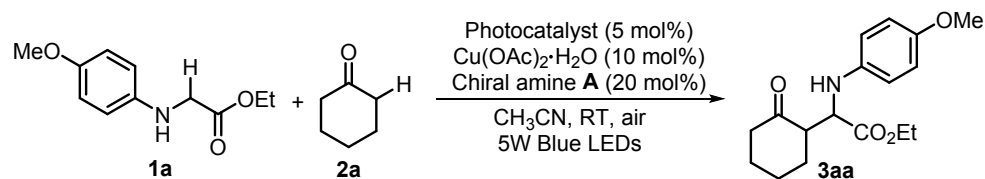

| Entry          | Photocatalyst                                           | Yield (%) <sup>b</sup> | dr (anti/syn) <sup>c</sup> | ee (%) <sup>c</sup> |
|----------------|---------------------------------------------------------|------------------------|----------------------------|---------------------|
| 1              | Eosin Y                                                 | Trace                  | -                          | -                   |
| 2              | Eosin B                                                 | ND                     | -                          | -                   |
| 3              | Rose bengal                                             | Trace                  | -                          | -                   |
| 4 <sup>e</sup> | Rhodamine 6G                                            | 78                     | 97/3                       | 95                  |
| 5              | Ru(bpy) <sub>3</sub> Cl <sub>2</sub> ·6H <sub>2</sub> O | 76                     | 97/3                       | 96                  |
| 6              | Acr <sup>+</sup> -Mes ClO <sub>4</sub> <sup>-</sup>     | NR                     | -                          | -                   |
| 7              | Ir(ppy) <sub>3</sub>                                    | 52                     | 97/3                       | 79                  |
| 8              | Ru(bpy) <sub>3</sub> (PF <sub>6</sub> ) <sub>2</sub>    | 55                     | 88/12                      | 81                  |
| 9              | -                                                       | NR                     | -                          | -                   |

<sup>a</sup>Reaction conditions: **1a** (0.1 mmol), photocatalyst (5 mol %), Cu(OAc)<sub>2</sub>·H<sub>2</sub>O (10 mol%), CH<sub>3</sub>CN (2 mL), 5 W blue LED light irradiation under air for 2 h, then chiral amine catalyst **A** (20 mol%) and **2a** (0.5 mmol) were added. <sup>b</sup>Isolated yields. <sup>c</sup>The dr and ee values of product was determined by chiral-phase HPLC analysis. <sup>e</sup>5 W blue LED light irradiation under air for 8 h.

**Table S3** Screening of Lewis Acids<sup>a</sup>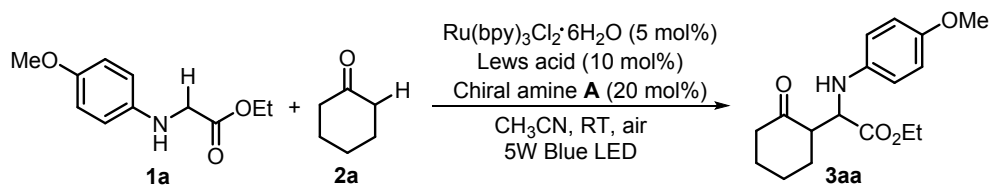

| Entry | Additive                               | Yield (%) <sup>b</sup> | dr (anti/syn) <sup>c</sup> | ee (%) <sup>c</sup> |
|-------|----------------------------------------|------------------------|----------------------------|---------------------|
| 1     | Zn(OAc) <sub>2</sub> ·H <sub>2</sub> O | ND                     | -                          | -                   |
| 2     | Zn(OAc) <sub>2</sub>                   | ND                     | -                          | -                   |
| 3     | Cu(OAc) <sub>2</sub> ·H <sub>2</sub> O | 76                     | 97/3                       | 96                  |
| 4     | Cu(OTf) <sub>2</sub>                   | 63                     | 98/2                       | 86                  |
| 5     | CuCl                                   | 59                     | 97/3                       | 91                  |
| 6     | CuI                                    | 63                     | 97/3                       | 92                  |
| 7     | CuSO <sub>4</sub>                      | 68                     | 97/3                       | 92                  |
| 8     | Mg(ClO <sub>4</sub> ) <sub>2</sub>     | ND                     | -                          | -                   |
| 9     | -                                      | ND                     | -                          | -                   |

<sup>a</sup>Reaction conditions: **1a** (0.1 mmol), Ru(bpy)<sub>3</sub>Cl<sub>2</sub>·6H<sub>2</sub>O (5 mol %), additive (10 mol%), CH<sub>3</sub>CN (2 mL), 5 W blue LED light irradiation under air for 2 h, then chiral amine catalyst **A** (20 mol%) and **2a** (0.5 mmol) were added. <sup>b</sup>Isolated yields. <sup>c</sup>The dr and ee values of product was determined by chiral-phase HPLC analysis.



**Table S4** Screening of Solvents<sup>a</sup>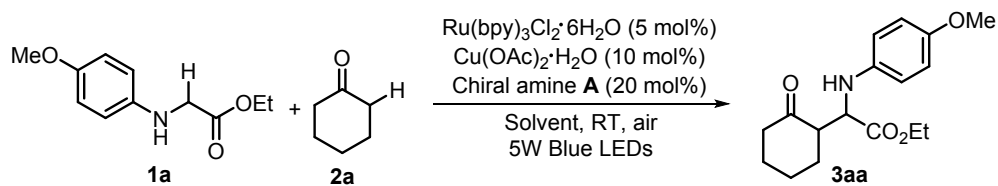

| Entry | Solvent            | Yield (%) <sup>b</sup> | dr (anti/syn) <sup>c</sup> | ee (%) <sup>c</sup> |
|-------|--------------------|------------------------|----------------------------|---------------------|
| 1     | DCM                | 59                     | 99/1                       | 83                  |
| 2     | DCE                | 80                     | 95/5                       | 78                  |
| 3     | DMF                | 38                     | 91/9                       | 93                  |
| 4     | DMSO               | 65                     | 97/3                       | 94                  |
| 5     | Toluene            | Trace                  | -                          | -                   |
| 6     | CH <sub>3</sub> CN | 76                     | 97/3                       | 96                  |
| 7     | CHCl <sub>3</sub>  | 44                     | 94/6                       | 81                  |

<sup>a</sup>Reaction conditions: **1a** (0.1 mmol), Ru(bpy)<sub>3</sub>Cl<sub>2</sub>·6H<sub>2</sub>O (5 mol %), Cu(OAc)<sub>2</sub>·H<sub>2</sub>O (10 mol%), solvent (2 mL), 5 W blue LED light irradiation under air for 2 h, then chiral amine catalyst **A** (20 mol%) and **2a** (0.5 mmol) were added. <sup>b</sup>Isolated yields.

<sup>c</sup>The dr and ee values of product was determined by chiral-phase HPLC analysis.

**Table S5** Screening of Catalyst Loading<sup>a</sup>

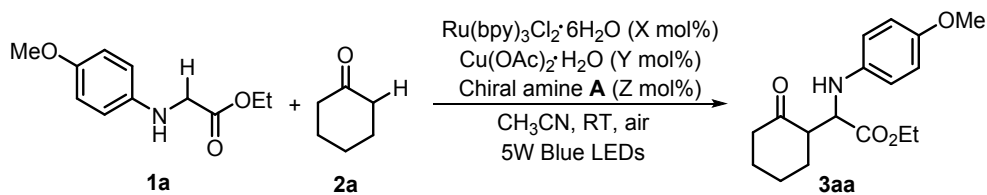

| Entry          | X (mol %) | Y (mol %) | Z (mol %) | Yield (%) <sup>b</sup> | dr (anti/syn) <sup>c</sup> | ee (%) <sup>c</sup> |
|----------------|-----------|-----------|-----------|------------------------|----------------------------|---------------------|
| 1              | 5         | 10        | 20        | 76                     | 97/3                       | 96                  |
| 2              | 3         | 10        | 20        | 78                     | 97/3                       | 96                  |
| 3              | 2         | 10        | 20        | 80                     | 97/3                       | 96                  |
| 4              | 2         | 5         | 20        | 80                     | 97/3                       | 97                  |
| 5              | 2         | 5         | 10        | 47                     | 95/5                       | 94                  |
| 6 <sup>d</sup> | 2         | 5         | 20        | 81                     | 98/2                       | 97                  |
| 7 <sup>e</sup> | 2         | 5         | 20        | NR                     | -                          | -                   |
| 8 <sup>f</sup> | 2         | 5         | 20        | NR                     | -                          | -                   |

<sup>a</sup>Reaction conditions: **1a** (0.1 mmol), Ru(bpy)<sub>3</sub>Cl<sub>2</sub>·6H<sub>2</sub>O (X mol %), Cu(OAc)<sub>2</sub>·H<sub>2</sub>O (Y mol%), CH<sub>3</sub>CN (2 mL), 5 W blue LED light irradiation under air for 2 h, then chiral amine catalyst **A** (Z mol%) and **2a** (0.5 mmol) were added. <sup>b</sup>Isolated yields. <sup>c</sup>The dr and ee values of product were determined by chiral-phase HPLC analysis. <sup>d</sup>1.5 mL CH<sub>3</sub>CN was used. <sup>e</sup>Under Ar atmosphere. <sup>f</sup>In dark.

## 2. X-ray Crystal Structure for Compound 3ae

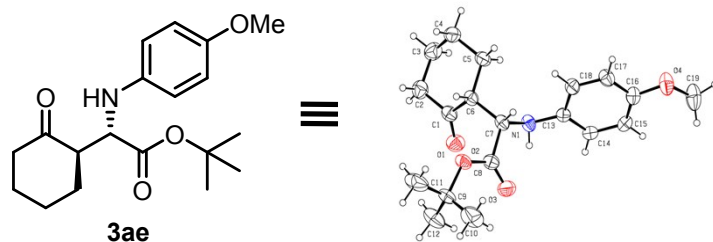

|                                             |                                                               |
|---------------------------------------------|---------------------------------------------------------------|
| Empirical formula                           | C <sub>19</sub> H <sub>27</sub> NO <sub>4</sub>               |
| Formula weight                              | 333.41                                                        |
| Temperature/K                               | 293.09(10)                                                    |
| Crystal system                              | orthorhombic                                                  |
| Space group                                 | P2 <sub>1</sub> 2 <sub>1</sub> 2 <sub>1</sub>                 |
| a/Å                                         | 8.6070(2)                                                     |
| b/Å                                         | 12.3679(4)                                                    |
| c/Å                                         | 17.9028(6)                                                    |
| α/°                                         | 90                                                            |
| β/°                                         | 90                                                            |
| γ/°                                         | 90                                                            |
| Volume/Å <sup>3</sup>                       | 1905.77(10)                                                   |
| Z                                           | 4                                                             |
| ρ <sub>calc</sub> /cm <sup>3</sup>          | 1.162                                                         |
| μ/mm <sup>-1</sup>                          | 0.654                                                         |
| F(000)                                      | 720.0                                                         |
| Crystal size/mm <sup>3</sup>                | 0.18 × 0.15 × 0.12                                            |
| Radiation                                   | CuKα (λ = 1.54184)                                            |
| 2θ range for data collection/°              | 9.882 to 133.166                                              |
| Index ranges                                | -10 ≤ h ≤ 8, -14 ≤ k ≤ 14, -21 ≤ l ≤ 19                       |
| Reflections collected                       | 5850                                                          |
| Independent reflections                     | 3234 [R <sub>int</sub> = 0.0174, R <sub>sigma</sub> = 0.0292] |
| Data/restraints/parameters                  | 3234/0/225                                                    |
| Goodness-of-fit on F <sup>2</sup>           | 1.117                                                         |
| Final R indexes [I ≥ 2σ (I)]                | R <sub>1</sub> = 0.0403, wR <sub>2</sub> = 0.1027             |
| Final R indexes [all data]                  | R <sub>1</sub> = 0.0456, wR <sub>2</sub> = 0.1078             |
| Largest diff. peak/hole / e Å <sup>-3</sup> | 0.12/-0.20                                                    |
| Flack parameter                             | -0.08(14)                                                     |

### 3. UV/Vis Absorption Spectra

The UV/Vis absorption spectra were recorded in 1 cm path quartz cuvettes by using a Varian Cary-300 Conc UV/Vis spectrometer, respectively.

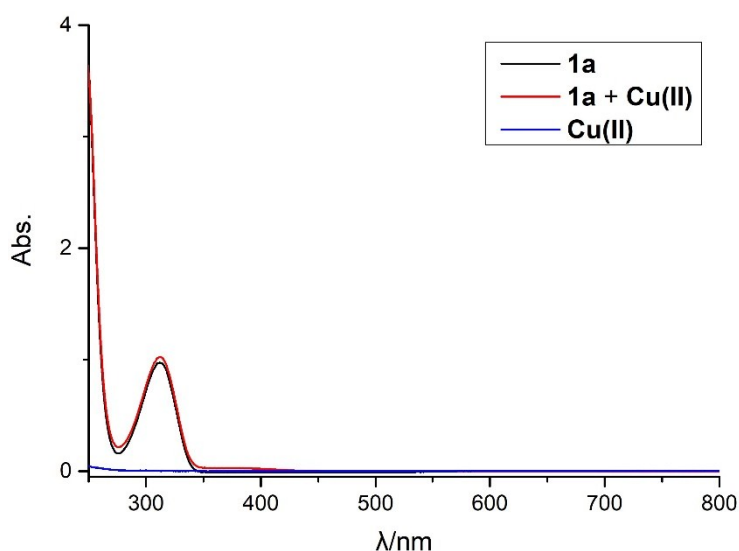

**Fig. S1** UV-vis spectra of **1a** (black), **1a** with Cu(II) ion (red), and Cu(II) salts (blue) in CH<sub>3</sub>CN. The concentration of **1a** is  $4.0 \times 10^{-4}$  M, and the concentration of Cu(II) ion is  $2.0 \times 10^{-5}$  M. The Cu(II) ion used here refers to Cu(OAc)<sub>2</sub>·H<sub>2</sub>O.

## 4. Experiment Information and Product Data

### 4.1 General Information.

Unless otherwise noted, all reagents were purchased from commercial sources and used as received without further purification. *N*-arylglycine derivatives<sup>2,6</sup> were prepared according to literature procedures. Unless otherwise indicated, all experiments were carried out under air atmosphere. Irradiation of photochemical reactions was carried out using a 5 W blue LED bulb. The silica gel (200–300 meshes) was used for column chromatography and TLC inspections were taken on silica gel GF254 plates. Liquid <sup>1</sup>H, <sup>13</sup>C and <sup>19</sup>F NMR spectra were recorded on a Bruker Avance III 400 MHz spectrometer. High resolution mass spectra (HRMS) were obtained on a mass spectrometer by using electrospray ionization (ESI) analyzed by quadrupole time-of-flight (QTof).

### 4.2 General Procedure for the Visible-Light-Induced Enantioselective Aerobic Oxidative Cross-Dehydrogenative Coupling of Glycine Derivatives with Aldehydes or Ketones.

To a solution of *N*-arylglycine derivatives **1** (0.2 mmol, 1 eq) and Ru(bpy)<sub>3</sub>Cl<sub>2</sub>·6H<sub>2</sub>O (2 mol%) in dry CH<sub>3</sub>CN (3 mL) was added Cu(OAc)·H<sub>2</sub>O (0.01 mmol, 5 mol%). The mixed

solution was irradiated with a 5 W blue LED bulb under air atmosphere at room temperature. After full conversion of *N*-arylglycine derivatives as monitored by TLC, ketone (5 eq) or aldehyde (3 eq) and chiral amine catalyst A (20 or 10 mol%) were added, then the mixture was stirred in dark overnight. The solvent was removed under vacuo, and the residue was separated by silica gel column chromatography (with petroleum ether/EtOAc = 4:1 as eluent) to afford the product.

### 4.3 Characterization of the Products

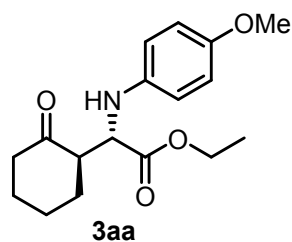

**Ethyl (S)-2-((4-methoxyphenyl)amino)-2-((R)-2-oxocyclohexyl)acetate.**<sup>1</sup> The product was obtained in 81% yield. Pale yellow liquid. <sup>1</sup>H NMR (400 MHz, CDCl<sub>3</sub>) δ 6.76 (d, *J* = 8.9 Hz, 2H), 6.63 (d, *J* = 8.9 Hz, 2H), 4.48 – 4.05 (m, 3H), 3.99 (d, *J* = 4.1 Hz, 1H), 3.73 (s, 3H), 3.15 – 3.05 (m, 1H), 2.46 – 2.28 (m, 2H), 2.15 – 2.01 (m, 2H), 1.97 – 1.86 (m, 2H), 1.77 – 1.62 (m, 2H), 1.21 (t, *J* = 7.1 Hz, 3H). <sup>13</sup>C NMR (100 MHz, CDCl<sub>3</sub>) δ 210.9, 173.0, 152.7, 142.1, 115.6, 114.7, 61.1, 59.0, 55.6, 53.5, 41.8, 30.5, 26.8, 24.5, 14.1. [α]<sub>D</sub><sup>18.2</sup> +30 (c 0.5, CHCl<sub>3</sub>). The enantiomeric excess (97% *ee*) was determined by HPLC with a Daicel Chiralpak AS-H column (hexane/*i*-PrOH = 90:10, flow rate: 0.5 mL/min, λ<sub>max</sub> 254 nm): t<sub>R</sub> (*anti* major enantiomer) = 26.9 min; t<sub>R</sub> (*anti* minor enantiomer) = 36.6 min.

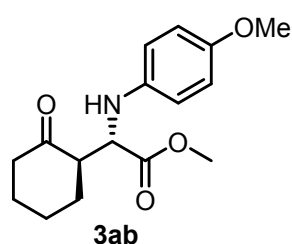

**Methyl (S)-2-((4-methoxyphenyl)amino)-2-((R)-2-oxocyclohexyl)acetate.**<sup>2</sup> The product was obtained in 78% yield. Pale yellow liquid. <sup>1</sup>H NMR (400 MHz, CDCl<sub>3</sub>) δ 6.76 (d, *J* = 8.9 Hz, 2H), 6.63 (d, *J* = 8.9 Hz, 2H), 4.30 (brs, 1H), 4.00 (d, *J* = 4.0 Hz, 1H), 3.73 (s, 3H), 3.68 (s, 3H), 3.17 – 3.08 (m, 1H), 2.46 – 2.39 (m, 1H), 2.37 – 2.29 (m, 1H), 2.14 – 2.02 (m, 2H), 1.99 – 1.88 (m, 2H), 1.77 – 1.63 (m, 2H). <sup>13</sup>C NMR (100 MHz, CDCl<sub>3</sub>) δ 211.0, 173.6, 152.7, 142.0, 115.4, 114.7, 58.8, 55.6, 53.6, 52.2, 41.8, 30.5, 26.8, 24.5. [α]<sub>D</sub><sup>20.3</sup> +26 (c 0.5, CHCl<sub>3</sub>). The enantiomeric excess (96% *ee*) was determined by HPLC with a Daicel Chiralpak AS-H column

(hexane/*i*-PrOH = 90:10, flow rate: 0.5 mL/min,  $\lambda_{\max}$  240 nm):  $t_R$  (*anti* major enantiomer) = 36.9 min;  $t_R$  (*anti* minor enantiomer) = 51.8 min.

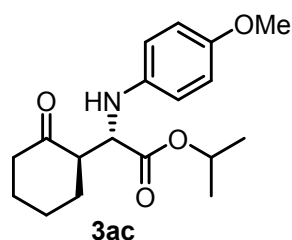

**Isopropyl (S)-2-((4-methoxyphenyl)amino)-2-((R)-2-oxocyclohexyl)acetate.**<sup>1</sup> The product was obtained in 79% yield. Pale yellow liquid. <sup>1</sup>H NMR (400 MHz, CDCl<sub>3</sub>)  $\delta$  6.76 (d,  $J$  = 8.9 Hz, 2H), 6.63 (d,  $J$  = 8.9 Hz, 2H), 5.04 – 4.94 (m, 1H), 4.24 (brs, 1H), 3.96 (d,  $J$  = 4.1 Hz, 1H), 3.73 (s, 3H), 3.11 – 3.06 (m, 1H), 2.45 – 2.28 (m, 2H), 2.13 – 2.03 (m, 2H), 1.96 – 1.87 (m, 2H), 1.78 – 1.63 (m, 2H), 1.22 (d,  $J$  = 6.2 Hz, 3H), 1.14 (d,  $J$  = 6.2 Hz, 3H). <sup>13</sup>C NMR (100 MHz, CDCl<sub>3</sub>)  $\delta$  210.8, 172.4, 152.6, 142.2, 115.6, 114.6, 68.7, 59.1, 55.6, 53.5, 41.7, 30.4, 26.8, 24.4, 21.7, 21.6.  $[\alpha]_D^{13.5}$  +33 (c 0.1, CHCl<sub>3</sub>). The enantiomeric excess (97% *ee*) was determined by HPLC with a Daicel Chiralpak AS-H column (hexane/*i*-PrOH = 90:10, flow rate: 0.5 mL/min,  $\lambda_{\max}$  254 nm):  $t_R$  (*anti* major enantiomer) = 21.1 min;  $t_R$  (*anti* minor enantiomer) = 32.8 min.

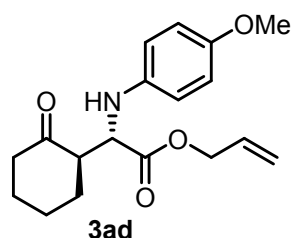

**Allyl (S)-2-((4-methoxyphenyl)amino)-2-((R)-2-oxocyclohexyl)acetate.**<sup>1</sup> The product was obtained in 79% yield. Pale yellow liquid. <sup>1</sup>H NMR (400 MHz, CDCl<sub>3</sub>)  $\delta$  6.76 (d,  $J$  = 8.9 Hz, 2H), 6.64 (d,  $J$  = 8.9 Hz, 2H), 5.90 – 5.80 (m, 1H), 5.26 – 5.17 (m, 2H), 4.54 – 4.63 (m, 2H), 4.28 (brs, 1H), 4.01 (d,  $J$  = 3.8 Hz, 1H), 3.73 (s, 3H), 3.17 – 3.11 (m, 1H), 2.45 – 2.28 (m, 2H), 2.15 – 2.03 (m, 2H), 1.97 – 1.88 (m, 2H), 1.78 – 1.62 (m, 2H). <sup>13</sup>C NMR (100 MHz, CDCl<sub>3</sub>)  $\delta$  211.0, 172.7, 152.7, 142.0, 131.7, 118.2, 115.5, 114.7, 65.7, 58.9, 55.6, 53.5, 41.8, 30.5, 26.8, 24.5.  $[\alpha]_D^{14.6}$  +25 (c 0.1, CHCl<sub>3</sub>). The enantiomeric excess (97% *ee*) was determined by HPLC with a Daicel Chiralpak AS-H column (hexane/*i*-PrOH = 90:10, flow rate: 0.5 mL/min,  $\lambda_{\max}$  254 nm):  $t_R$  (*anti* major enantiomer) = 32.5 min;  $t_R$  (*anti* minor enantiomer) = 48.0 min.

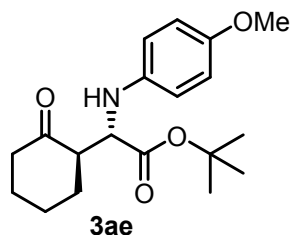

**Tert-butyl (S)-2-((4-methoxyphenyl)amino)-2-((R)-2-oxocyclohexyl)acetate.**<sup>1</sup> The product was obtained in 80% yield. White solid. <sup>1</sup>H NMR (400 MHz, CDCl<sub>3</sub>) δ 6.76 (d, *J* = 8.9 Hz, 2H), 6.62 (d, *J* = 8.9 Hz, 2H), 4.20 (brs, 1H), 3.92 (d, *J* = 4.2 Hz, 1H), 3.73 (s, 3H), 3.08 – 2.99 (m, 1H), 2.46 – 2.27 (m, 2H), 2.13 – 2.01 (m, 2H), 1.96 – 1.85 (m, 2H), 1.78 – 1.64 (m, 2H), 1.39 (s, 9H). <sup>13</sup>C NMR (100 MHz, CDCl<sub>3</sub>) δ 210.9, 172.0, 152.5, 142.3, 115.4, 114.6, 81.5, 59.4, 55.6, 53.4, 41.7, 30.3, 27.9, 26.8, 24.4. [ $\alpha$ ]<sub>D</sub><sup>14.6</sup> +24 (c 0.1, CHCl<sub>3</sub>). The enantiomeric excess (96% *ee*) was determined by HPLC with a Daicel Chiralpak AS-H column (hexane/*i*-PrOH = 90:10, flow rate: 0.5 mL/min,  $\lambda_{\max}$  254 nm): *t*<sub>R</sub> (*anti* major enantiomer) = 12.5 min; *t*<sub>R</sub> (*anti* minor enantiomer) = 20.4 min.

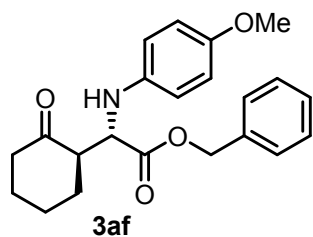

**Benzyl (S)-2-((4-methoxyphenyl)amino)-2-((R)-2-oxocyclohexyl)acetate.** The product was obtained in 76% yield. Pale yellow liquid. <sup>1</sup>H NMR (400 MHz, CDCl<sub>3</sub>) δ 7.36 – 7.28 (m, 3H), 7.25 – 7.20 (m, 2H), 6.75 (d, *J* = 8.9 Hz, 2H), 6.62 (d, *J* = 8.9 Hz, 2H), 5.16 – 5.07 (m, 2H), 4.30 (brs, 1H), 4.04 (d, *J* = 3.9 Hz, 1H), 3.73 (s, 3H), 3.17 – 3.07 (m, 1H), 2.44 – 2.39 (m, 1H), 2.34 – 2.24 (m, 1H), 2.13 – 1.98 (m, 2H), 1.94 – 1.84 (m, 2H), 1.75 – 1.58 (m, 2H). <sup>13</sup>C NMR (100 MHz, CDCl<sub>3</sub>) δ 211.0, 172.9, 152.7, 142.0, 135.5, 128.4, 128.1, 127.9, 115.6, 114.7, 66.8, 59.0, 55.6, 53.4, 41.7, 30.5, 26.8, 24.5. HRMS (ESI): calcd for C<sub>22</sub>H<sub>25</sub>NO<sub>4</sub>Na (M+Na<sup>+</sup>) 390.1676, found 390.1684. [ $\alpha$ ]<sub>D</sub><sup>14.5</sup> +23 (c 0.1, CHCl<sub>3</sub>). The enantiomeric excess (96% *ee*) was determined by HPLC with a Daicel Chiralpak AD-H column (hexane/*i*-PrOH = 90:10, flow rate: 1.0 mL/min,  $\lambda_{\max}$  254 nm): *t*<sub>R</sub> (*anti* minor enantiomer) = 29.2 min; *t*<sub>R</sub> (*anti* major enantiomer) = 43.3 min.

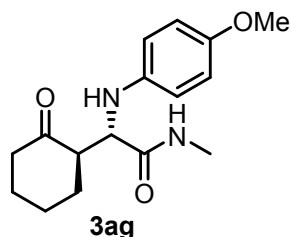

**(S)-2-((4-methoxyphenyl)amino)-N-methyl-2-((R)-2-oxocyclohexyl)acetamide.** The product was obtained in 48% yield. Pale yellow liquid.  $^1\text{H NMR}$  (400 MHz,  $\text{CDCl}_3$ )  $\delta$  6.98 (brs, 1H), 6.77 (d,  $J = 8.9$  Hz, 2H), 6.55 (d,  $J = 8.9$  Hz, 2H), 4.40 (brs, 1H), 3.92 (d,  $J = 2.4$  Hz, 1H), 3.74 (s, 3H), 3.41 – 3.31 (m, 1H), 2.80 (d,  $J = 4.9$  Hz, 3H), 2.44 – 2.34 (m, 2H), 2.11 – 2.02 (m, 2H), 1.91 – 1.84 (m, 1H), 1.72 – 1.58 (m, 3H).  $^{13}\text{C NMR}$  (100 MHz,  $\text{CDCl}_3$ )  $\delta$  213.6, 172.8, 152.5, 141.2, 115.0, 114.3, 59.1, 55.7, 53.2, 42.4, 31.4, 27.6, 26.1, 25.0. HRMS (ESI): calcd for  $\text{C}_{16}\text{H}_{22}\text{N}_2\text{O}_3\text{Na}$  ( $\text{M}+\text{Na}^+$ ) 313.1523, found 313.1516.  $[\alpha]_{\text{D}}^{20.5} +88$  (c 0.5,  $\text{CHCl}_3$ ). The enantiomeric excess (76% *ee*) was determined by HPLC with a Daicel Chiralpak IC column (hexane/*i*-PrOH = 80:20, flow rate: 1.0 mL/min,  $\lambda_{\text{max}}$  240 nm):  $t_{\text{R}}$  (*anti* major enantiomer) = 24.6 min;  $t_{\text{R}}$  (*anti* minor enantiomer) = 28.6 min.

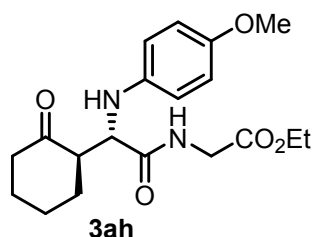

**Ethyl ((S)-2-((4-methoxyphenyl)amino)-2-((R)-2-oxocyclohexyl)acetyl)glycinate.** The product was obtained in 34% yield. Pale yellow liquid.  $^1\text{H NMR}$  (400 MHz,  $\text{CDCl}_3$ )  $\delta$  7.45 (brs, 1H), 6.77 (d,  $J = 8.9$  Hz, 2H), 6.59 (d,  $J = 8.9$  Hz, 2H), 4.42 (brs, 1H), 4.18 (q,  $J = 7.1$  Hz, 2H), 4.13 – 4.07 (m, 2H), 3.92 (dd,  $J = 18.1, 5.2$  Hz, 1H), 3.74 (s, 3H), 3.33 – 3.24 (m, 1H), 2.46 – 2.35 (m, 2H), 2.10 – 2.04 (m, 2H), 1.92 – 1.85 (m, 1H), 1.71 – 1.62 (m, 3H), 1.26 (t,  $J = 7.1$  Hz, 3H).  $^{13}\text{C NMR}$  (100 MHz,  $\text{CDCl}_3$ )  $\delta$  213.5, 172.6, 169.5, 152.6, 141.0, 115.0, 114.6, 61.3, 58.7, 55.7, 53.2, 42.3, 41.3, 30.7, 27.5, 24.9, 14.1. HRMS (ESI): calcd for  $\text{C}_{19}\text{H}_{26}\text{N}_2\text{O}_5\text{Na}$  ( $\text{M}+\text{Na}^+$ ) 385.1734, found 385.1729.  $[\alpha]_{\text{D}}^{20.6} +75$  (c 0.4,  $\text{CHCl}_3$ ). The enantiomeric excess (91% *ee*) was determined by HPLC with a Daicel Chiralpak IC column (hexane/*i*-PrOH = 80:20, flow rate: 1.0 mL/min,  $\lambda_{\text{max}}$  240 nm):  $t_{\text{R}}$  (*anti* minor enantiomer) = 55.7 min;  $t_{\text{R}}$  (*anti* major enantiomer) = 64.4 min.



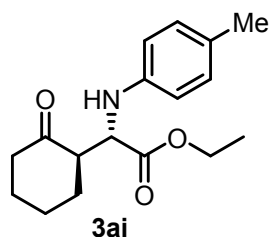

**Ethyl (S)-2-((R)-2-oxocyclohexyl)-2-(p-tolylamino)acetate.** The product was obtained in 63% yield. Pale yellow liquid.  $^1\text{H NMR}$  (400 MHz,  $\text{CDCl}_3$ )  $\delta$  6.99 (d,  $J = 8.2$  Hz, 2H), 6.59 (d,  $J = 8.2$  Hz, 2H), 4.35 (brs, 1H), 4.21 – 4.11 (m, 2H), 4.09 (d,  $J = 3.9$  Hz, 1H), 3.17 – 3.12 (m, 1H), 2.47 – 2.42 (m, 1H), 2.38 – 2.30 (m, 1H), 2.24 (s, 3H), 2.18 – 2.01 (m, 2H), 1.99 – 1.83 (m, 2H), 1.79 – 1.63 (m, 2H), 1.23 (t,  $J = 7.1$  Hz, 3H).  $^{13}\text{C NMR}$  (101 MHz,  $\text{CDCl}_3$ )  $\delta$  210.9, 172.9, 145.7, 129.7, 127.5, 114.0, 61.2, 58.0, 53.6, 41.8, 30.4, 26.8, 24.5, 20.3, 14.1. HRMS (ESI): calcd for  $\text{C}_{17}\text{H}_{23}\text{NO}_3\text{Na}$  ( $\text{M}+\text{Na}^+$ ) 312.1570, found 312.1562.  $[\alpha]_{\text{D}}^{18.3} +36$  (c 0.5,  $\text{CHCl}_3$ ). The enantiomeric excess (96% *ee*) was determined by HPLC with a Daicel Chiralpak IC column (hexane/*i*-PrOH = 93:7, flow rate: 1.0 mL/min,  $\lambda_{\text{max}}$  245 nm):  $t_{\text{R}}$  (*anti* minor enantiomer) = 16.7 min;  $t_{\text{R}}$  (*anti* major enantiomer) = 19.9 min.

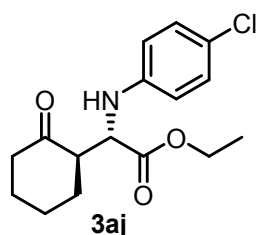

**Ethyl (S)-2-((4-chlorophenyl)amino)-2-((R)-2-oxocyclohexyl)acetate.** The product was obtained in 30% yield. Pale yellow liquid.  $^1\text{H NMR}$  (400 MHz,  $\text{CDCl}_3$ )  $\delta$  7.11 (d,  $J = 8.8$  Hz, 2H), 6.57 (d,  $J = 8.8$  Hz, 2H), 4.53 (brs, 1H), 4.20 – 4.12 (m, 2H), 4.03 (d,  $J = 3.2$  Hz, 1H), 3.22 – 3.12 (m, 1H), 2.47 – 2.30 (m, 2H), 2.16 – 2.04 (m, 2H), 2.00 – 1.92 (m, 1H), 1.89 – 1.79 (m, 1H), 1.78 – 1.62 (m, 2H), 1.22 (t,  $J = 7.1$  Hz, 3H).  $^{13}\text{C NMR}$  (100 MHz,  $\text{CDCl}_3$ )  $\delta$  211.1, 172.4, 146.6, 129.1, 122.9, 114.9, 61.4, 57.7, 53.5, 41.9, 30.6, 26.9, 24.6, 14.1. HRMS (ESI): calcd for  $\text{C}_{16}\text{H}_{20}\text{ClNO}_3\text{Na}$  ( $\text{M}+\text{Na}^+$ ) 332.1024, found 332.1018.  $[\alpha]_{\text{D}}^{18.4} +45$  (c 0.2,  $\text{CHCl}_3$ ). The enantiomeric excess (93% *ee*) was determined by HPLC with a Daicel Chiralpak IC column (hexane/*i*-PrOH = 97:3, flow rate: 1.0 mL/min,  $\lambda_{\text{max}}$  254 nm):  $t_{\text{R}}$  (*anti* minor enantiomer) = 18.1 min;  $t_{\text{R}}$  (*anti* major enantiomer) = 23.9 min.

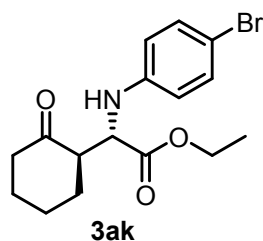

**Ethyl (S)-2-((4-bromophenyl)amino)-2-((R)-2-oxocyclohexyl)acetate.** The product was obtained in 29% yield. Pale yellow liquid.  $^1\text{H NMR}$  (400 MHz,  $\text{CDCl}_3$ )  $\delta$  7.25 (d,  $J = 8.9$  Hz, 2H), 6.53 (d,  $J = 8.9$  Hz, 2H), 4.54 (brs, 1H), 4.21 – 4.11 (m, 2H), 4.03 (d,  $J = 2.9$  Hz, 1H), 3.22 – 3.13 (m, 1H), 2.48 – 2.30 (m, 2H), 2.15 – 2.04 (m, 2H), 1.96 – 1.93 (m, 1H), 1.88 – 1.79 (m, 1H), 1.78 – 1.62 (m, 2H), 1.22 (t,  $J = 7.1$  Hz, 3H).  $^{13}\text{C NMR}$  (100 MHz,  $\text{CDCl}_3$ )  $\delta$  211.1, 172.4, 147.1, 131.9, 115.3, 109.9, 61.4, 57.5, 53.4, 41.9, 30.6, 26.9, 24.6, 14.1. HRMS (ESI): calcd for  $\text{C}_{16}\text{H}_{20}\text{BrNO}_3\text{Na}$  ( $\text{M}+\text{Na}^+$ ) 376.0519, found 376.0512.  $[\alpha]_{\text{D}}^{18.2} +30$  (c 0.2,  $\text{CHCl}_3$ ). The enantiomeric excess (90% *ee*) was determined by HPLC with a Daicel Chiralpak IC column (hexane/*i*-PrOH = 97:3, flow rate: 1.0 mL/min,  $\lambda_{\text{max}}$  254 nm):  $t_{\text{R}}$  (*anti* minor enantiomer) = 19.3 min;  $t_{\text{R}}$  (*anti* major enantiomer) = 26.9 min.

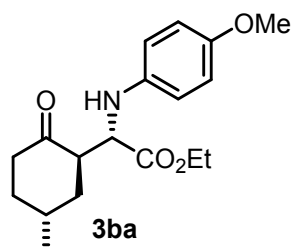

**Ethyl (S)-2-((4-methoxyphenyl)amino)-2-((1R,5R)-5-methyl-2-oxocyclohexyl)acetate.<sup>3</sup>** The product was obtained in 67% yield. Pale yellow liquid.  $^1\text{H NMR}$  (400 MHz,  $\text{CDCl}_3$ )  $\delta$  6.76 (d,  $J = 8.9$  Hz, 2H), 6.62 (d,  $J = 9.0$  Hz, 2H), 4.25 – 3.95 (m, 4H), 3.73 (s, 3H), 3.05 – 3.00 (m, 1H), 2.46 – 2.32 (m, 2H), 2.28 – 2.15 (m, 1H), 2.10 – 1.93 (m, 2H), 1.78 – 1.59 (m, 2H), 1.22 (t,  $J = 7.1$  Hz, 3H), 1.14 (d,  $J = 6.8$  Hz, 3H).  $^{13}\text{C NMR}$  (100 MHz,  $\text{CDCl}_3$ )  $\delta$  211.4, 172.8, 152.9, 141.4, 115.5, 114.8, 61.2, 59.0, 55.7, 50.4, 37.8, 36.3, 33.3, 26.8, 19.4, 14.1.  $[\alpha]_{\text{D}}^{17.8} +18$  (c 0.5,  $\text{CHCl}_3$ ). The enantiomeric excess (97% *ee*) was determined by HPLC with a Daicel Chiralpak AS-H column (hexane/*i*-PrOH = 96:4, flow rate: 0.7 mL/min,  $\lambda_{\text{max}}$  240 nm):  $t_{\text{R}}$  (*anti* major enantiomer) = 27.7 min;  $t_{\text{R}}$  (*anti* minor enantiomer) = 69.6 min.

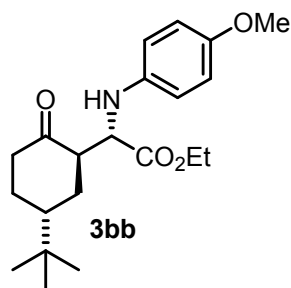

**Ethyl (S)-2-((1R,5R)-5-(tert-butyl)-2-oxocyclohexyl)-2-((4-methoxyphenyl)amino)acetate.**

The product was obtained in 73% yield. Pale yellow liquid.  $^1\text{H NMR}$  (400 MHz,  $\text{CDCl}_3$ )  $\delta$  6.75 (d,  $J = 8.8$  Hz, 2H), 6.62 (d,  $J = 8.9$  Hz, 2H), 4.33 (d,  $J = 9.4$  Hz, 1H), 4.21 – 4.10 (m, 2H), 3.97 (brs, 1H), 3.73 (s, 3H), 2.82 – 2.78 (m, 1H), 2.46 – 2.34 (m, 2H), 2.10 – 1.96 (m, 2H), 1.79 – 1.64 (m, 2H), 1.56 – 1.45 (m, 1H), 1.22 (t,  $J = 7.1$  Hz, 3H), 0.93 (s, 9H).  $^{13}\text{C NMR}$  (100 MHz,  $\text{CDCl}_3$ )  $\delta$  211.9, 172.6, 153.0, 140.6, 115.5, 114.7, 61.2, 58.5, 55.6, 51.6, 41.9, 38.7, 32.5, 28.7, 27.3, 26.7, 14.2. HRMS (ESI): calcd for  $\text{C}_{21}\text{H}_{31}\text{NO}_4\text{Na}$  ( $\text{M}+\text{Na}^+$ ) 384.2145, found 384.2161.  $[\alpha]_{\text{D}}^{19.5} +28$  (c 0.5,  $\text{CHCl}_3$ ). The enantiomeric excess (97% *ee*) was determined by HPLC with a Daicel Chiralpak IC column (hexane/*i*-PrOH = 95:5, flow rate: 0.8 mL/min,  $\lambda_{\text{max}}$  240 nm):  $t_{\text{R}}$  (*anti* major enantiomer) = 41.8 min;  $t_{\text{R}}$  (*anti* minor enantiomer) = 122.4 min.

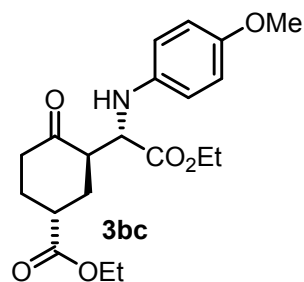

**Ethyl (1R,3R)-3-((S)-2-ethoxy-1-((4-methoxyphenyl)amino)-2-oxoethyl)-4-oxocyclohexane-1-carboxylate.**

The product was obtained in 62% yield. Pale yellow liquid.  $^1\text{H NMR}$  (400 MHz,  $\text{CDCl}_3$ )  $\delta$  6.76 (d,  $J = 8.9$  Hz, 2H), 6.64 (d,  $J = 8.9$  Hz, 2H), 4.24 (q,  $J = 7.1$  Hz, 2H), 4.21 – 4.02 (m, 3H), 3.94 (d,  $J = 4.2$  Hz, 1H), 3.73 (s, 3H), 3.42 – 3.29 (m, 1H), 2.98 – 2.89 (m, 1H), 2.55 – 2.44 (m, 2H), 2.41 – 2.33 (m, 2H), 2.24 – 2.16 (m, 1H), 1.98 – 1.92 (m, 1H), 1.31 (t,  $J = 7.1$  Hz, 3H), 1.21 (t,  $J = 7.1$  Hz, 3H).  $^{13}\text{C NMR}$  (100 MHz,  $\text{CDCl}_3$ )  $\delta$  210.1, 173.9, 172.6, 152.8, 142.0, 115.7, 114.7, 61.2, 60.9, 59.0, 55.6, 50.2, 38.4, 38.1, 31.0, 27.6, 14.2, 14.1. HRMS (ESI): calcd for  $\text{C}_{20}\text{H}_{27}\text{NO}_6\text{Na}$  ( $\text{M}+\text{Na}^+$ ) 400.1731, found 400.1745.  $[\alpha]_{\text{D}}^{19.8} +2$  (c 0.5,  $\text{CHCl}_3$ ). The enantiomeric excess (97% *ee*) was determined by HPLC with a Daicel Chiralpak IC column (hexane/*i*-PrOH = 93:7, flow rate: 1.0 mL/min,  $\lambda_{\text{max}}$  240 nm):  $t_{\text{R}}$  (*anti* major enantiomer) = 64.3 min;  $t_{\text{R}}$  (*anti* minor enantiomer) = 101.6 min.

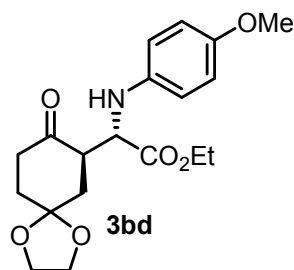

**Ethyl (S)-2-((4-methoxyphenyl)amino)-2-((R)-8-oxo-1,4-dioxaspiro[4.5]decan-7-yl)acetate.**<sup>1</sup> The product was obtained in 84% yield. Pale yellow liquid. <sup>1</sup>H NMR (400 MHz, CDCl<sub>3</sub>)  $\delta$  6.75 (d,  $J = 8.9$  Hz, 2H), 6.63 (d,  $J = 8.9$  Hz, 2H), 4.25 – 4.10 (m, 3H), 4.08 – 4.00 (m, 4H), 3.92 (d,  $J = 3.5$  Hz, 1H), 3.73 (s, 3H), 3.51 – 3.45 (m, 1H), 2.73 – 2.62 (m, 1H), 2.43 – 2.37 (m, 1H), 2.29 (t,  $J = 13.1$  Hz, 1H), 2.14 – 1.96 (m, 3H), 1.21 (t,  $J = 7.1$  Hz, 3H). <sup>13</sup>C NMR (100 MHz, CDCl<sub>3</sub>)  $\delta$  209.5, 172.6, 152.9, 142.1, 115.8, 114.7, 107.4, 64.8, 64.6, 61.2, 58.9, 55.6, 50.0, 37.9, 37.6, 33.8, 14.0.  $[\alpha]_D^{19.1} +15$  (c 0.4, CHCl<sub>3</sub>). The enantiomeric excess (96% *ee*) was determined by HPLC with a Daicel Chiralpak IC column (hexane/*i*-PrOH = 88:12, flow rate: 1.0 mL/min,  $\lambda_{\max}$  240 nm):  $t_R$  (*anti* minor enantiomer) = 28.2 min;  $t_R$  (*anti* major enantiomer) = 35.1 min.

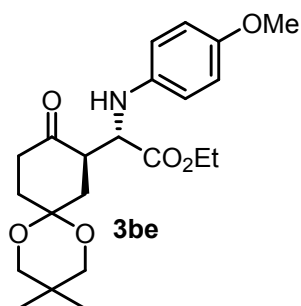

**Ethyl (S)-2-((R)-3,3-dimethyl-9-oxo-1,5-dioxaspiro[5.5]undecan-8-yl)-2-((4-methoxyphenyl)amino)acetate.** The product was obtained in 77% yield. Pale yellow liquid. <sup>1</sup>H NMR (400 MHz, CDCl<sub>3</sub>)  $\delta$  6.76 (d,  $J = 8.9$  Hz, 2H), 6.64 (d,  $J = 8.9$  Hz, 2H), 4.47 – 4.00 (m, 3H), 3.94 (d,  $J = 2.8$  Hz, 1H), 3.73 (s, 3H), 3.58 (s, 2H), 3.55 (d,  $J = 3.2$  Hz, 2H), 3.41 – 3.35 (m, 1H), 2.67 – 2.47 (m, 3H), 2.41 – 2.27 (m, 1H), 2.08 (t,  $J = 13.3$  Hz, 1H), 1.80 – 1.71 (m, 1H), 1.22 (t,  $J = 7.1$  Hz, 3H), 1.05 (s, 3H), 0.98 (s, 3H). <sup>13</sup>C NMR (100 MHz, CDCl<sub>3</sub>)  $\delta$  209.9, 172.7, 152.9, 142.1, 115.8, 114.7, 96.5, 70.7, 70.4, 61.3, 59.0, 55.6, 48.8, 36.8, 35.4, 30.4, 30.2, 22.6, 22.5, 14.1. HRMS (ESI): calcd for C<sub>22</sub>H<sub>31</sub>NO<sub>6</sub>Na (M+Na<sup>+</sup>) 428.2044, found 428.2057.  $[\alpha]_D^{19.3} +12$  (c 0.5, CHCl<sub>3</sub>). The enantiomeric excess (95% *ee*) was determined by HPLC with a Daicel Chiralpak IC column (hexane/*i*-PrOH = 88:12, flow rate: 1.0 mL/min,  $\lambda_{\max}$  240 nm):  $t_R$  (*anti* minor enantiomer) = 21.1 min;  $t_R$  (*anti* major enantiomer) = 26.5 min.

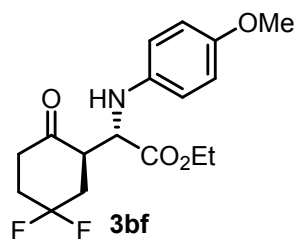

**Ethyl (S)-2-((R)-5,5-difluoro-2-oxocyclohexyl)-2-((4-methoxyphenyl)amino)acetate.** The product was obtained in 56% yield. Pale yellow liquid.  $^1\text{H}$  NMR (400 MHz,  $\text{CDCl}_3$ )  $\delta$  6.78 (d,  $J = 8.9$  Hz, 2H), 6.64 (d,  $J = 8.9$  Hz, 2H), 4.28 – 4.09 (m, 3H), 3.87 (brs, 1H), 3.75 (s, 3H), 3.62 – 3.45 (m, 1H), 2.74 – 2.64 (m, 1H), 2.60 – 2.37 (m, 4H), 2.27 – 2.11 (m, 1H), 1.23 (t,  $J = 7.1$  Hz, 3H).  $^{13}\text{C}$  NMR (100 MHz,  $\text{CDCl}_3$ )  $\delta$  207.0, 172.1, 153.2, 141.8, 116.39 (d,  $J = 4.9$  Hz), 116.1, 114.8, 61.6, 58.9, 55.6, 48.74 (d,  $J = 9.8$  Hz), 36.43 (t,  $J = 10.0$  Hz), 36.28 (d,  $J = 51.0$  Hz), 32.56 (t,  $J = 26.0$  Hz), 14.1.  $^{19}\text{F}$  NMR (376 MHz,  $\text{CDCl}_3$ )  $\delta$  -94.7 (d,  $J = 242.9$  Hz), -100.8 (d,  $J = 242.5$  Hz). HRMS (ESI): calcd for  $\text{C}_{17}\text{H}_{21}\text{F}_2\text{NO}_4\text{Na}$  ( $\text{M}+\text{Na}^+$ ) 364.1331, found 364.1347.  $[\alpha]_{\text{D}}^{18.7} +12.5$  (c 0.4,  $\text{CHCl}_3$ ). The enantiomeric excess (85% *ee*) was determined by HPLC with a Daicel Chiralpak IC column (hexane/*i*-PrOH = 90:10, flow rate: 0.5 mL/min,  $\lambda_{\text{max}}$  240 nm):  $t_{\text{R}}$  (*anti* minor enantiomer) = 26.5 min;  $t_{\text{R}}$  (*anti* major enantiomer) = 36.0 min.

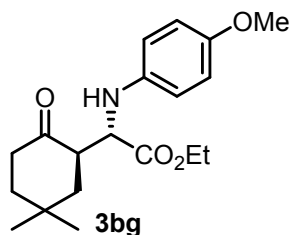

**Ethyl (S)-2-((R)-5,5-dimethyl-2-oxocyclohexyl)-2-((4-methoxyphenyl)amino)acetate.<sup>3</sup>** The product was obtained in 59% yield. Pale yellow liquid.  $^1\text{H}$  NMR (400 MHz,  $\text{CDCl}_3$ )  $\delta$  6.77 (d,  $J = 9.0$  Hz, 2H), 6.64 (d,  $J = 9.0$  Hz, 2H), 4.25 (brs, 1H), 4.19 – 4.11 (m, 2H), 3.87 (d,  $J = 3.4$  Hz, 1H), 3.74 (s, 3H), 3.31 – 3.26 (m, 1H), 2.53 – 2.44 (m, 1H), 2.32 – 2.26 (m, 1H), 1.95 (t,  $J = 13.2$  Hz, 1H), 1.81 – 1.74 (m, 1H), 1.74 – 1.69 (m, 1H), 1.68 – 1.63 (m, 1H), 1.25 (s, 3H), 1.22 (t,  $J = 7.1$  Hz, 3H), 1.05 (s, 3H).  $^{13}\text{C}$  NMR (100 MHz,  $\text{CDCl}_3$ )  $\delta$  211.5, 173.1, 152.8, 142.4, 115.7, 114.7, 61.2, 59.4, 55.7, 49.6, 42.9, 38.8, 38.0, 31.5, 30.7, 24.6, 14.1.  $[\alpha]_{\text{D}}^{18.2} +26$  (c 0.5,  $\text{CHCl}_3$ ). The enantiomeric excess (77% *ee*) was determined by HPLC with a Daicel Chiralpak AS-H column (hexane/*i*-PrOH = 90:10, flow rate: 0.5 mL/min,  $\lambda_{\text{max}}$  240 nm):  $t_{\text{R}}$  (*anti* major enantiomer) = 17.6 min;  $t_{\text{R}}$  (*anti* minor enantiomer) = 18.9 min.

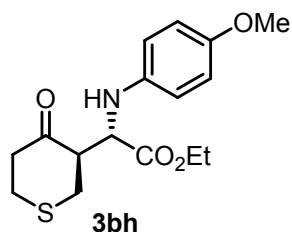

**Ethyl (S)-2-((4-methoxyphenyl)amino)-2-((R)-4-oxotetrahydro-2H-thiopyran-3-yl)acetate.**<sup>1</sup> The product was obtained in 76% yield. Pale yellow liquid. <sup>1</sup>H NMR (400 MHz, CDCl<sub>3</sub>) δ 6.77 (d, *J* = 8.9 Hz, 2H), 6.65 (d, *J* = 8.9 Hz, 2H), 4.24 (d, *J* = 4.9 Hz, 1H), 4.21 – 4.09 (m, 3H), 3.74 (s, 3H), 3.38 (dt, *J* = 9.7, 4.7 Hz, 1H), 3.15 (dd, *J* = 13.6, 10.1 Hz, 1H), 3.01 – 2.87 (m, 3H), 2.80 – 2.68 (m, 2H), 1.21 (t, *J* = 7.1 Hz, 3H). <sup>13</sup>C NMR (100 MHz, CDCl<sub>3</sub>) δ 208.0, 172.1, 153.1, 141.3, 115.8, 114.7, 61.4, 58.9, 55.6, 55.2, 43.7, 32.7, 29.8, 14.1. [ $\alpha$ ]<sub>D</sub><sup>13.7</sup> +49 (c 0.1, CHCl<sub>3</sub>). The enantiomeric excess (97% *ee*) was determined by HPLC with a Daicel Chiralpak OZ-H column (hexane/*i*-PrOH = 97:3, flow rate: 1.0 mL/min,  $\lambda_{\max}$  235 nm): *t*<sub>R</sub> (*anti* minor enantiomer) = 34.1 min; *t*<sub>R</sub> (*anti* major enantiomer) = 40.3 min.

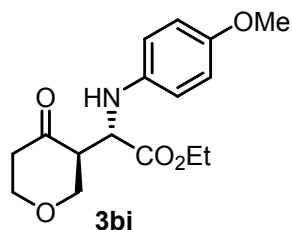

**Ethyl (S)-2-((4-methoxyphenyl)amino)-2-((S)-4-oxotetrahydro-2H-pyran-3-yl)acetate.**<sup>1</sup> The product was obtained in 75% yield. Pale yellow liquid. <sup>1</sup>H NMR (400 MHz, CDCl<sub>3</sub>) δ 6.77 (d, *J* = 8.9 Hz, 2H), 6.62 (d, *J* = 9.0 Hz, 2H), 4.25 – 4.07 (m, 6H), 3.91 (dd, *J* = 11.2, 9.1 Hz, 1H), 3.83 – 3.77 (m, 1H), 3.73 (s, 3H), 3.27 – 3.22 (m, 1H), 2.64 – 2.57 (m, 1H), 2.48 (dt, *J* = 14.8, 3.8 Hz, 1H), 1.22 (t, *J* = 7.1 Hz, 3H). <sup>13</sup>C NMR (100 MHz, CDCl<sub>3</sub>) δ 206.2, 172.1, 153.1, 141.2, 115.8, 114.7, 70.0, 67.8, 61.5, 56.4, 55.6, 53.8, 42.0, 14.1. [ $\alpha$ ]<sub>D</sub><sup>14.0</sup> +11 (c 0.1, CHCl<sub>3</sub>). The enantiomeric excess (96% *ee*) was determined by HPLC with a Daicel Chiralpak IC-3 column (hexane/*i*-PrOH = 90:10, flow rate: 1.0 mL/min,  $\lambda_{\max}$  240 nm): *t*<sub>R</sub> (*anti* minor enantiomer) = 32.9 min; *t*<sub>R</sub> (*anti* major enantiomer) = 36.4 min.

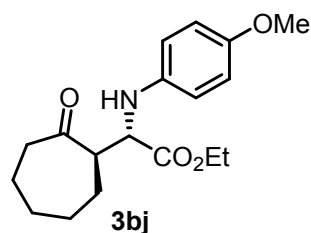

**Ethyl (S)-2-((4-methoxyphenyl)amino)-2-((R)-2-oxocycloheptyl)acetate.**<sup>4</sup> The product was obtained in 65% yield. Pale yellow liquid. <sup>1</sup>H NMR (400 MHz, CDCl<sub>3</sub>) δ 6.77 (d, *J* = 8.9 Hz, 2H), 6.67 (d, *J* = 8.9 Hz, 2H), 4.42 – 4.24 (m, 2H), 4.16 (q, *J* = 7.1 Hz, 2H), 3.74 (s, 3H), 3.05 – 3.00 (m, 1H), 2.60 – 2.48 (m, 2H), 2.05 – 1.87 (m, 4H), 1.63 – 1.48 (m, 2H), 1.38 – 1.31 (m, 2H), 1.23 (t, *J* = 7.2 Hz, 3H). <sup>13</sup>C NMR (100 MHz, CDCl<sub>3</sub>) δ 214.2, 172.5, 152.6, 140.9, 115.1, 114.8, 61.3, 60.6, 55.6, 54.3, 43.8, 29.9, 29.0, 27.1, 24.2, 14.1. [ $\alpha$ ]<sub>D</sub><sup>14.1</sup> +32 (c 0.1, CHCl<sub>3</sub>). The enantiomeric excess (97% *ee*) was determined by HPLC with a Daicel Chiralpak AS-H column (hexane/*i*-PrOH = 90:10, flow rate: 1.0 mL/min,  $\lambda_{\max}$  254 nm): *t*<sub>R</sub> (*anti* major enantiomer) = 12.1 min; *t*<sub>R</sub> (*anti* minor enantiomer) = 25.8 min.

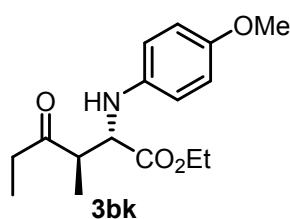

**Ethyl (2S,3R)-2-((4-methoxyphenyl)amino)-3-methyl-4-oxohexanoate.**<sup>1</sup> The product was obtained in 59% yield. Pale yellow liquid. <sup>1</sup>H NMR (400 MHz, CDCl<sub>3</sub>) δ 6.77 (d, *J* = 8.9 Hz, 2H), 6.65 (d, *J* = 8.9 Hz, 2H), 4.25 – 4.07 (m, 4H), 3.74 (s, 3H), 3.07 – 3.00 (m, 1H), 2.55 (q, *J* = 7.2 Hz, 2H), 1.26 – 1.21 (m, 3H), 1.20 – 1.16 (m, 3H), 1.07 (t, *J* = 7.2 Hz, 3H). <sup>13</sup>C NMR (100 MHz, CDCl<sub>3</sub>) δ 212.2, 172.7, 153.1, 140.8, 115.8, 114.8, 61.2, 60.8, 55.7, 48.4, 34.9, 14.1, 13.4, 7.5. [ $\alpha$ ]<sub>D</sub><sup>12.7</sup> -30 (c 0.1, CHCl<sub>3</sub>). The enantiomeric excess (96% *ee*) was determined by HPLC with a Daicel Chiralpak AD-H column (hexane/*i*-PrOH = 96:4, flow rate: 0.5 mL/min,  $\lambda_{\max}$  254 nm): *t*<sub>R</sub> (*anti* minor enantiomer) = 33.6 min; *t*<sub>R</sub> (*anti* major enantiomer) = 38.3 min.

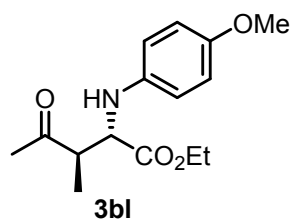

**Ethyl (2S,3R)-2-((4-methoxyphenyl)amino)-3-methyl-4-oxopentanoate.**<sup>1</sup> The product was obtained in 35% yield. Pale yellow liquid. <sup>1</sup>H NMR (400 MHz, CDCl<sub>3</sub>) δ 6.77 (d, *J* = 8.9 Hz, 2H), 6.65 (d, *J* = 8.9 Hz, 2H), 4.22 – 4.11 (m, 4H), 3.74 (s, 3H), 3.05 – 2.98 (m, 1H), 2.23 (s, 3H), 1.21 (t, *J* = 7.2 Hz, 3H), 1.19 (d, *J* = 7.0 Hz, 3H). <sup>13</sup>C NMR (100 MHz, CDCl<sub>3</sub>) δ 209.5, 172.5, 153.0, 140.7, 115.7, 114.8, 61.3, 60.5, 55.6, 49.4, 28.6, 14.1, 13.00. [ $\alpha$ ]<sub>D</sub><sup>18.6</sup> -23.3 (c 0.3, CHCl<sub>3</sub>). The enantiomeric excess (96% *ee*) was determined by HPLC with a Daicel Chiralpak

AS-H column (hexane/*i*-PrOH = 96:4, flow rate: 1.0 mL/min,  $\lambda_{\max}$  240 nm):  $t_R$  (*anti* major enantiomer) = 20.7 min;  $t_R$  (*anti* minor enantiomer) = 38.2 min.

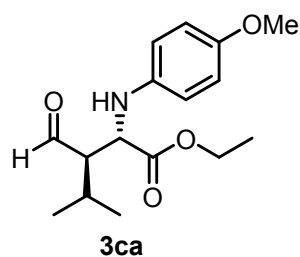

**Ethyl (2S,3R)-3-formyl-2-((4-methoxyphenyl)amino)-4-methylpentanoate.**<sup>5</sup> The product was obtained in 78% yield. Pale yellow liquid. <sup>1</sup>H NMR (400 MHz, CDCl<sub>3</sub>)  $\delta$  9.74 (d,  $J$  = 3.4 Hz, 1H), 6.77 (d,  $J$  = 8.9 Hz, 2H), 6.66 (d,  $J$  = 8.9 Hz, 2H), 4.36 (d,  $J$  = 7.7 Hz, 1H), 4.15 (q,  $J$  = 7.1 Hz, 2H), 3.99 (brs, 1H), 3.73 (s, 3H), 2.62 – 2.57 (m, 1H), 2.18 – 2.03 (m, 1H), 1.20 (t,  $J$  = 7.1 Hz, 3H), 1.12 (d,  $J$  = 6.9 Hz, 3H), 1.07 (d,  $J$  = 6.9 Hz, 3H). <sup>13</sup>C NMR (100 MHz, CDCl<sub>3</sub>)  $\delta$  203.2, 172.8, 153.2, 140.4, 115.8, 114.7, 61.3, 59.5, 57.2, 55.6, 27.5, 21.2, 19.1, 14.1.  $[\alpha]_D^{13.8}$  -31 (c 0.1, CHCl<sub>3</sub>). The enantiomeric excess (94% *ee*) was determined by HPLC with a Daicel Chiralpak AS-H column (hexane/*i*-PrOH = 90:10, flow rate: 0.5 mL/min,  $\lambda_{\max}$  240 nm):  $t_R$  (*anti* major enantiomer) = 17.4 min;  $t_R$  (*anti* minor enantiomer) = 32.8 min.

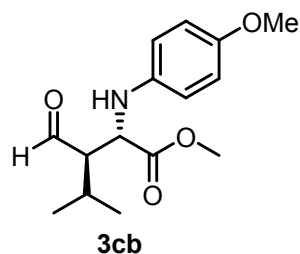

**Methyl (2S,3R)-3-formyl-2-((4-methoxyphenyl)amino)-4-methylpentanoate.** The product was obtained in 73% yield. Pale yellow liquid. <sup>1</sup>H NMR (400 MHz, CDCl<sub>3</sub>)  $\delta$  9.75 (d,  $J$  = 3.3 Hz, 1H), 6.78 (d,  $J$  = 8.9 Hz, 2H), 6.66 (d,  $J$  = 8.9 Hz, 2H), 4.38 (d,  $J$  = 7.5 Hz, 1H), 4.04 (brs, 1H), 3.74 (s, 3H), 3.69 (s, 3H), 2.65 – 2.58 (m, 1H), 2.16 – 2.04 (m, 1H), 1.13 (d,  $J$  = 6.9 Hz, 3H), 1.08 (d,  $J$  = 6.9 Hz, 3H). <sup>13</sup>C NMR (100 MHz, CDCl<sub>3</sub>)  $\delta$  203.2, 173.4, 153.2, 140.4, 115.7, 114.8, 59.6, 57.0, 55.6, 52.3, 27.5, 21.2, 19.2. HRMS (ESI): calcd for C<sub>15</sub>H<sub>21</sub>NO<sub>4</sub>Na (M+Na<sup>+</sup>) 302.1363, found 302.1361.  $[\alpha]_D^{19.9}$  -54 (c 0.5, CHCl<sub>3</sub>). The enantiomeric excess (93% *ee*) was determined by HPLC with a Daicel Chiralpak AS-H column (hexane/*i*-PrOH = 90:10, flow rate: 0.5 mL/min,  $\lambda_{\max}$  240 nm):  $t_R$  (*anti* major enantiomer) = 24.8 min;  $t_R$  (*anti* minor enantiomer) = 41.5 min.



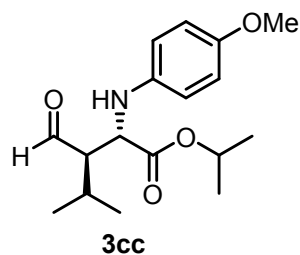

**Isopropyl (2S,3R)-3-formyl-2-((4-methoxyphenyl)amino)-4-methylpentanoate.**<sup>5</sup> The product was obtained in 80% yield. Pale yellow liquid. <sup>1</sup>H NMR (400 MHz, CDCl<sub>3</sub>) δ 9.73 (d, *J* = 3.6 Hz, 1H), 6.77 (d, *J* = 9.0 Hz, 2H), 6.67 (d, *J* = 9.0 Hz, 2H), 5.05 – 4.96 (m, 1H), 4.33 (d, *J* = 7.9 Hz, 1H), 3.91 (brs, 1H), 3.74 (s, 3H), 2.59 – 2.54 (m, 1H), 2.15 – 2.03 (m, 1H), 1.19 (d, *J* = 6.3 Hz, 3H), 1.16 (d, *J* = 6.3 Hz, 3H), 1.12 (d, *J* = 6.9 Hz, 3H), 1.07 (d, *J* = 6.9 Hz, 3H). <sup>13</sup>C NMR (100 MHz, CDCl<sub>3</sub>) δ 203.2, 172.2, 153.2, 140.4, 115.9, 114.6, 69.0, 59.5, 57.3, 55.6, 27.5, 21.7, 21.6, 21.2, 19.0. [α]<sub>D</sub><sup>13.1</sup> -21 (c 0.1, CHCl<sub>3</sub>). The enantiomeric excess (90% *ee*) was determined by HPLC with a Daicel Chiralpak AS-H column (hexane/*i*-PrOH = 90:10, flow rate: 0.5 mL/min, λ<sub>max</sub> 254 nm): t<sub>R</sub> (*anti* major enantiomer) = 14.8 min; t<sub>R</sub> (*anti* minor enantiomer) = 35.9 min.

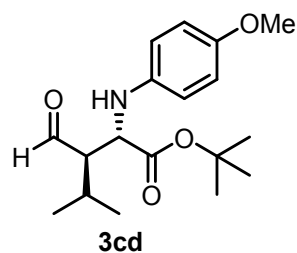

**Tert-butyl (2S,3R)-3-formyl-2-((4-methoxyphenyl)amino)-4-methylpentanoate.**<sup>4</sup> The product was obtained in 82% yield. Pale yellow liquid. <sup>1</sup>H NMR (400 MHz, CDCl<sub>3</sub>) δ 9.73 (d, *J* = 3.7 Hz, 1H), 6.77 (d, *J* = 8.9 Hz, 2H), 6.67 (d, *J* = 8.9 Hz, 2H), 4.27 (d, *J* = 8.0 Hz, 1H), 3.91 (brs, 1H), 3.74 (s, 3H), 2.55 – 2.50 (m, 1H), 2.16 – 2.07 (m, 1H), 1.38 (s, 9H), 1.12 (d, *J* = 6.9 Hz, 3H), 1.07 (d, *J* = 6.9 Hz, 3H). <sup>13</sup>C NMR (100 MHz, CDCl<sub>3</sub>) δ 203.4, 171.8, 153.0, 140.5, 115.8, 114.6, 82.1, 59.5, 57.8, 55.5, 27.8, 27.5, 21.2, 19.0. [α]<sub>D</sub><sup>14.5</sup> -47 (c 0.1, CHCl<sub>3</sub>). The enantiomeric excess (90% *ee*) was determined by HPLC with a Daicel Chiralpak AS-H column (hexane/*i*-PrOH = 90:10, flow rate: 0.5 mL/min, λ<sub>max</sub> 254 nm): t<sub>R</sub> (*anti* major enantiomer) = 12.2 min; t<sub>R</sub> (*anti* minor enantiomer) = 31.1 min.

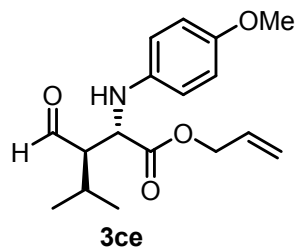

**Allyl (2S,3R)-3-formyl-2-((4-methoxyphenyl)amino)-4-methylpentanoate.**<sup>4</sup> The product was obtained in 81% yield. Pale yellow liquid. <sup>1</sup>H NMR (400 MHz, CDCl<sub>3</sub>) δ 9.75 (d, *J* = 3.2 Hz, 1H), 6.77 (d, *J* = 8.8 Hz, 2H), 6.67 (d, *J* = 8.8 Hz, 2H), 5.87 – 5.78 (m, 1H), 5.26 – 5.19 (m, 2H), 4.59 (d, *J* = 5.6 Hz, 2H), 4.40 (d, *J* = 7.4 Hz, 1H), 4.00 (brs, 1H), 3.74 (s, 3H), 2.65 – 2.61 (m, 1H), 2.15 – 2.05 (m, 1H), 1.13 (d, *J* = 6.9 Hz, 3H), 1.07 (d, *J* = 6.8 Hz, 3H). <sup>13</sup>C NMR (100 MHz, CDCl<sub>3</sub>) δ 203.2, 172.5, 153.2, 140.3, 131.3, 118.8, 115.7, 114.7, 65.8, 59.5, 57.0, 55.6, 27.5, 21.2, 19.1. [α]<sub>D</sub><sup>12.9</sup> -27 (c 0.1, CHCl<sub>3</sub>). The enantiomeric excess (91% *ee*) was determined by HPLC with a Daicel Chiralpak AS-H column (hexane/*i*-PrOH = 90:10, flow rate: 0.5 mL/min, λ<sub>max</sub> 254 nm): t<sub>R</sub> (*anti* major enantiomer) = 19.5 min; t<sub>R</sub> (*anti* minor enantiomer) = 38.3 min.

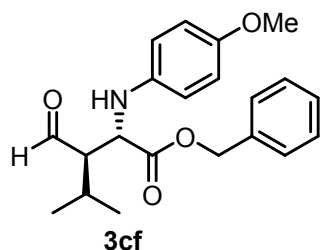

**Benzyl (2S,3R)-3-formyl-2-((4-methoxyphenyl)amino)-4-methylpentanoate.** The product was obtained in 80% yield. Pale yellow liquid. <sup>1</sup>H NMR (400 MHz, CDCl<sub>3</sub>) δ 9.73 (d, *J* = 3.4 Hz, 1H), 7.34 – 7.31 (m, 3H), 7.25 – 7.19 (m, 2H), 6.77 (d, *J* = 8.9 Hz, 2H), 6.67 (d, *J* = 8.9 Hz, 2H), 5.13 (s, 2H), 4.44 (d, *J* = 7.4 Hz, 1H), 4.00 (brs, 1H), 3.76 (s, 3H), 2.65 – 2.60 (m, 1H), 2.10 – 2.00 (m, 1H), 1.11 (d, *J* = 6.9 Hz, 3H), 1.05 (d, *J* = 6.9 Hz, 3H). <sup>13</sup>C NMR (100 MHz, CDCl<sub>3</sub>) δ 203.2, 172.7, 153.2, 140.3, 135.1, 128.5, 128.3, 128.2, 115.8, 114.7, 67.0, 59.4, 57.1, 55.6, 27.5, 21.2, 19.0. HRMS (ESI): calcd for C<sub>21</sub>H<sub>25</sub>NO<sub>4</sub>Na (M+Na<sup>+</sup>) 378.1676, found 378.1685. [α]<sub>D</sub><sup>14.4</sup> -36 (c 0.1, CHCl<sub>3</sub>). The enantiomeric excess (94% *ee*) was determined by HPLC with a Daicel Chiralpak AD-H column (hexane/*i*-PrOH = 90:10, flow rate: 1.0 mL/min, λ<sub>max</sub> 254 nm): t<sub>R</sub> (*anti* minor enantiomer) = 14.0 min; t<sub>R</sub> (*anti* major enantiomer) = 20.8 min.

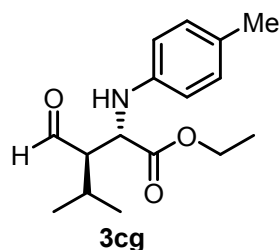

**Ethyl (2S,3R)-3-formyl-4-methyl-2-(p-tolylamino)pentanoate.** The product was obtained in 65% yield. Pale yellow liquid.  $^1\text{H NMR}$  (400 MHz,  $\text{CDCl}_3$ )  $\delta$  9.76 (d,  $J = 3.3$  Hz, 1H), 7.00 (d,  $J = 8.4$  Hz, 2H), 6.62 (d,  $J = 8.4$  Hz, 2H), 4.43 (s, 1H), 4.17 (q,  $J = 7.1$  Hz, 2H), 4.11 (brs, 1H), 2.66 – 2.62 (m, 1H), 2.25 (s, 3H), 2.17 – 2.08 (m, 1H), 1.23 (t,  $J = 7.1$  Hz, 3H), 1.14 (d,  $J = 6.9$  Hz, 3H), 1.08 (d,  $J = 6.9$  Hz, 3H).  $^{13}\text{C NMR}$  (100 MHz,  $\text{CDCl}_3$ )  $\delta$  203.3, 172.7, 144.1, 129.8, 128.4, 114.2, 61.4, 59.5, 56.3, 27.5, 21.2, 20.4, 19.3, 14.1. HRMS (ESI): calcd for  $\text{C}_{16}\text{H}_{23}\text{NO}_3\text{Na}$  ( $\text{M} + \text{Na}^+$ ) 300.1570, found 300.1562.  $[\alpha]_{\text{D}}^{18.4}$  -36 (c 0.5,  $\text{CHCl}_3$ ). The enantiomeric excess (93% *ee*) was determined by HPLC with a Daicel Chiralpak IC column (hexane/*i*-PrOH = 96:4, flow rate: 1.0 mL/min,  $\lambda_{\text{max}}$  240 nm):  $t_{\text{R}}$  (*anti* major enantiomer) = 13.8 min;  $t_{\text{R}}$  (*anti* minor enantiomer) = 14.8 min.

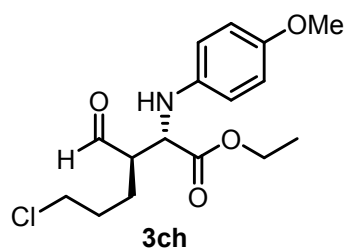

**Ethyl (2S,3R)-6-chloro-3-formyl-2-((4-methoxyphenyl)amino)hexanoate.** The product was obtained in 70% yield. Pale yellow liquid.  $^1\text{H NMR}$  (400 MHz,  $\text{CDCl}_3$ )  $\delta$  9.69 (d,  $J = 2.0$  Hz, 1H), 6.78 (d,  $J = 8.9$  Hz, 2H), 6.66 (d,  $J = 8.9$  Hz, 2H), 4.31 (d,  $J = 6.1$  Hz, 1H), 4.23 – 4.15 (m, 2H), 4.09 (brs, 1H), 3.74 (s, 3H), 3.48 – 3.57 (m, 2H), 2.82 – 2.74 (m, 1H), 1.95 – 1.85 (m, 2H), 1.84 – 1.74 (m, 2H), 1.24 (t,  $J = 7.1$  Hz, 3H).  $^{13}\text{C NMR}$  (100 MHz,  $\text{CDCl}_3$ )  $\delta$  201.4, 171.8, 153.2, 140.0, 115.7, 114.8, 61.7, 58.0, 55.6, 53.1, 44.3, 30.0, 22.7, 14.1. HRMS-ESI calcd for  $\text{C}_{16}\text{H}_{22}\text{ClNO}_4\text{Na}$  ( $\text{M} + \text{Na}^+$ ) 350.1133, found 350.1130.  $[\alpha]_{\text{D}}^{13.2}$  +12 (c 0.1,  $\text{CHCl}_3$ ). The enantiomeric excess (95% *ee*) was determined by HPLC with a Daicel Chiralpak AD-H column (hexane/*i*-PrOH = 90:10, flow rate: 1.0 mL/min,  $\lambda_{\text{max}}$  230 nm):  $t_{\text{R}}$  (*anti* minor enantiomer) = 15.5 min;  $t_{\text{R}}$  (*anti* major enantiomer) = 20.5 min.

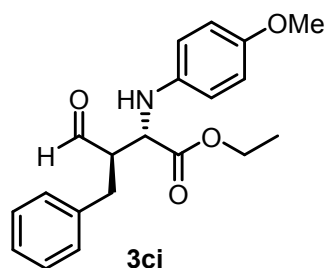

**Ethyl (2S,3R)-3-benzyl-2-((4-methoxyphenyl)amino)-4-oxobutanoate.**<sup>4</sup> The product was obtained in 60% yield. Pale yellow liquid. <sup>1</sup>H NMR (400 MHz, CDCl<sub>3</sub>) δ 9.73 (d, *J* = 1.2 Hz, 1H), 7.30 – 7.17 (m, 5H), 6.75 (d, *J* = 8.9 Hz, 2H), 6.55 (d, *J* = 8.9 Hz, 2H), 4.22 – 4.05 (m, 4H), 3.73 (s, 3H), 3.33 – 3.25 (m, 1H), 3.13 (dd, *J* = 14.0, 7.1 Hz, 1H), 2.93 (dd, *J* = 14.0, 7.8 Hz, 1H), 1.21 (t, *J* = 7.1 Hz, 3H). <sup>13</sup>C NMR (100 MHz, CDCl<sub>3</sub>) δ 201.8, 172.2, 153.0, 140.5, 137.8, 129.1, 128.7, 126.8, 115.6, 114.7, 61.6, 57.3, 55.6, 55.2, 31.7, 14.1. [α]<sub>D</sub><sup>18.4</sup> -14 (c 0.5, CHCl<sub>3</sub>). The enantiomeric excess (95% *ee*) was determined by HPLC with a Daicel Chiralpak AS-H column (hexane/*i*-PrOH = 98:2, flow rate: 1.0 mL/min, λ<sub>max</sub> 240 nm): t<sub>R</sub> (*anti* major enantiomer) = 50.5 min; t<sub>R</sub> (*anti* minor enantiomer) = 60.2 min.

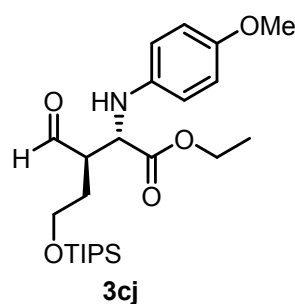

**Ethyl (2S,3R)-3-formyl-2-((4-methoxyphenyl)amino)-5-((triisopropylsilyloxy)pentanoate.** The product was obtained in 70% yield. Pale yellow liquid. <sup>1</sup>H NMR (400 MHz, CDCl<sub>3</sub>) δ 9.74 (d, *J* = 1.8 Hz, 1H), 6.77 (d, *J* = 8.9 Hz, 2H), 6.65 (d, *J* = 8.9 Hz, 2H), 4.34 (brs, 1H), 4.22 – 4.13 (m, 3H), 3.85 – 3.76 (m, 2H), 3.74 (s, 3H), 3.10 – 3.01 (m, 1H), 2.08 – 1.97 (m, 1H), 1.86 – 1.79 (m, 1H), 1.23 (t, *J* = 7.1 Hz, 3H), 1.08 – 1.02 (m, 21H). <sup>13</sup>C NMR (100 MHz, CDCl<sub>3</sub>) δ 202.4, 172.0, 152.9, 140.4, 115.4, 114.8, 61.5, 60.9, 57.8, 55.6, 51.0, 29.0, 17.9, 14.1, 11.8. HRMS (ESI): calcd for C<sub>24</sub>H<sub>41</sub>NO<sub>5</sub>SiNa (M+Na<sup>+</sup>) 474.2646, found 474.2655. [α]<sub>D</sub><sup>14.3</sup> -11 (c 0.1, CHCl<sub>3</sub>). The enantiomeric excess (90% *ee*) was determined by HPLC with a Daicel Chiralpak AD-H column (hexane/*i*-PrOH = 99:1, flow rate: 0.5 mL/min, λ<sub>max</sub> 254 nm): t<sub>R</sub> (*anti* minor enantiomer) = 34.5 min; t<sub>R</sub> (*anti* major enantiomer) = 50.6 min.

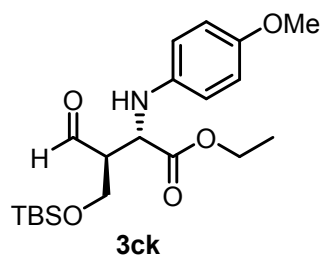

**Ethyl (2S,3S)-4-((tert-butyldimethylsilyloxy)-3-formyl-2-((4-methoxyphenyl)amino)butanoate.** The product was obtained in 58% yield. Pale yellow liquid.  $^1\text{H}$  NMR (400 MHz,  $\text{CDCl}_3$ )  $\delta$  9.77 (d,  $J = 1.3$  Hz, 1H), 6.78 (d,  $J = 8.9$  Hz, 2H), 6.69 (d,  $J = 8.9$  Hz, 2H), 4.50 (d,  $J = 5.6$  Hz, 1H), 4.22 – 4.14 (m, 3H), 4.04 (dd,  $J = 10.4, 5.3$  Hz, 1H), 3.95 (dd,  $J = 10.4, 6.6$  Hz, 1H), 3.75 (s, 3H), 3.01 (q,  $J = 5.3$  Hz, 1H), 1.24 (t,  $J = 7.1$  Hz, 3H), 0.92 (s, 9H), 0.09 (s, 3H), 0.08 (s, 3H).  $^{13}\text{C}$  NMR (100 MHz,  $\text{CDCl}_3$ )  $\delta$  201.4, 172.3, 153.1, 140.8, 115.7, 114.7, 61.5, 59.6, 56.14, 56.09, 55.6, 25.8, 18.2, 14.1, -5.62, -5.65. HRMS (ESI): calcd for  $\text{C}_{20}\text{H}_{33}\text{NO}_5\text{SiNa}$  ( $\text{M}+\text{Na}^+$ ) 418.2020, found 418.2029.  $[\alpha]_{\text{D}}^{14.2} +6$  (c 0.1,  $\text{CHCl}_3$ ). The enantiomeric excess (94% *ee*) was determined by HPLC with a Daicel Chiralpak AS-H column (hexane/*i*-PrOH = 95:5, flow rate: 0.5 mL/min,  $\lambda_{\text{max}}$  230 nm):  $t_{\text{R}}$  (*anti* major enantiomer) = 14.5 min;  $t_{\text{R}}$  (*anti* minor enantiomer) = 20.5 min.

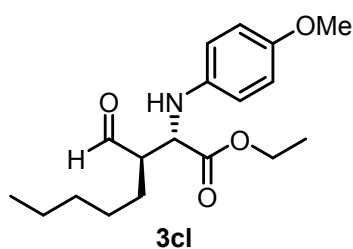

**Ethyl (2S,3R)-3-formyl-2-((4-methoxyphenyl)amino)octanoate.**<sup>5</sup> The product was obtained in 81% yield. Pale yellow liquid.  $^1\text{H}$  NMR (400 MHz,  $\text{CDCl}_3$ )  $\delta$  9.65 (d,  $J = 2.4$  Hz, 1H), 6.77 (d,  $J = 8.8$  Hz, 2H), 6.65 (d,  $J = 8.9$  Hz, 2H), 4.27 – 4.26 (m, 1H), 4.17 (qd,  $J = 7.1, 1.8$  Hz, 2H), 4.05 (brs, 1H), 3.74 (s, 3H), 2.78 – 2.72 (m, 1H), 1.76 – 1.68 (m, 1H), 1.59 – 1.52 (m, 1H), 1.36 – 1.25 (m, 6H), 1.22 (t,  $J = 7.1$  Hz, 3H), 0.87 (t,  $J = 5.9$  Hz, 3H).  $^{13}\text{C}$  NMR (100 MHz,  $\text{CDCl}_3$ )  $\delta$  202.2, 172.2, 153.1, 140.3, 115.6, 114.8, 61.4, 58.1, 55.6, 53.9, 31.6, 26.9, 25.6, 22.3, 14.1, 13.9.  $[\alpha]_{\text{D}}^{13.4} -9$  (c 0.1,  $\text{CHCl}_3$ ). The enantiomeric excess (97% *ee*) was determined by HPLC with a Daicel Chiralpak AS-H column (hexane/*i*-PrOH = 99:1, flow rate: 1.0 mL/min,  $\lambda_{\text{max}}$  254 nm):  $t_{\text{R}}$  (*anti* major enantiomer) = 26.4 min;  $t_{\text{R}}$  (*anti* minor enantiomer) = 29.9 min.

## 5. Transformations of the Products

### 5.1 Synthesis of compound 5.

To a solution of *tert*-butyl (4-methoxyphenyl) glycinate (47.4 mg, 0.2 mmol, 1 eq), Ru(bpy)<sub>3</sub>Cl<sub>2</sub>·6H<sub>2</sub>O (3.0 mg, 2 mol%) in dry CH<sub>3</sub>CN (3 mL) was added Cu(OAc)·H<sub>2</sub>O (2.0 mg, 0.01 mmol, 5 mol%). The mixed solution was irradiated with a 5 W blue LED bulb under air atmosphere at room temperature. After full conversion of the *tert*-butyl (4-methoxyphenyl)glycinate as monitored by TLC, iso-valeraldehyde (51.7 mg, 0.6 mmol, 3 eq) and catalyst **A** (4.4 mg, 0.02 mmol, 10 mol %) were added, and the mixture was stirred in dark overnight. Then acetic acid (13.7 μL, 0.24 mmol, 1.2 eq) and NaBH<sub>4</sub> (9.1 mg, 0.24 mmol, 1.2 eq) were added at 0 °C. The resulting mixture was vigorously stirred at 0 °C for 0.5 h, then quenched by sodium bicarbonate solution. The reaction mixture was extracted with ethyl acetate, the combined organic layers were washed with H<sub>2</sub>O and brine, respectively, and dried over anhydrous MgSO<sub>4</sub>. The solvent was removed under reduced pressure, and the residue was purified by silica gel column chromatography (with petroleum ether/EtOAc = 4:1 as eluent) to afford compound **5** (52.3 mg, 81% yield). Colorless liquid. <sup>1</sup>H NMR (400 MHz, CDCl<sub>3</sub>) δ 6.77 (d, *J* = 8.9 Hz, 2H), 6.67 (d, *J* = 8.9 Hz, 2H), 4.01 (d, *J* = 7.0 Hz, 1H), 3.84 (d, *J* = 4.8 Hz, 2H), 3.74 (s, 3H), 1.98 – 1.83 (m, 1H), 1.80 – 1.71 (m, 1H), 1.38 (s, 9H), 1.04 (d, *J* = 6.8 Hz, 3H), 0.97 (d, *J* = 6.8 Hz, 3H). <sup>13</sup>C NMR (100 MHz, CDCl<sub>3</sub>) δ 173.4, 153.3, 140.9, 116.6, 114.6, 81.6, 62.5, 62.0, 55.6, 48.6, 27.9, 26.7, 21.4, 18.6. HRMS (ESI): calcd for C<sub>18</sub>H<sub>29</sub>NO<sub>4</sub>Na (M+Na<sup>+</sup>) 346.1989, found 346.1986. [α]<sub>D</sub><sup>20.1</sup> -64 (c 0.5, CHCl<sub>3</sub>). The enantiomeric excess (96% *ee*) was determined by HPLC with a Daicel Chiralpak AS-H column (hexane/*i*-PrOH = 95:5, flow rate: 0.8 mL/min, λ<sub>max</sub> 240 nm): t<sub>R</sub> (*anti* major enantiomer) = 10.2 min; t<sub>R</sub> (*anti* minor enantiomer) = 13.9 min.

### 5.2 Synthesis of compound 6.

The solution of Ceric Ammonium Nitrate (CAN, 225 mg, 0.41 mmol, 2.5 eq) in distilled water (2.0 mL) was added slowly to the stirred solution of compound **5** (52.3 mg, 0.16 mmol) in CH<sub>3</sub>CN/H<sub>2</sub>O (3/1, 4.0 mL) at 0 °C. The reaction mixture was further stirred at 0 °C for about 1 h, till the reaction completed as monitored by TLC. The reaction was then quenched by adding the saturated Na<sub>2</sub>SO<sub>3</sub> solution and extracted with ethyl acetate. The combined organic layer was extracted with 0.1M HCl. The combined aqueous layer was neutralized by NaHCO<sub>3</sub> (pH = 7) and extracted with ethyl acetate. The combined organic layer was washed with brine solution, dried over anhydrous Na<sub>2</sub>SO<sub>4</sub> and evaporated under reduced pressure, compound **6** (25.4 mg, 73% yield) was afforded without further purification. Colorless liquid. <sup>1</sup>H NMR (400 MHz, CDCl<sub>3</sub>) δ 3.84 – 3.72 (m, 2H), 3.66 (d, *J* = 5.9 Hz, 1H), 3.02 (brs, 3H), 1.92 – 1.80 (m, 1H), 1.64 – 1.53

(m, 1H), 1.46 (s, 9H), 1.01 (d,  $J = 6.8$  Hz, 3H), 0.95 (d,  $J = 6.8$  Hz, 3H).  $^{13}\text{C}$  NMR (101 MHz,  $\text{CDCl}_3$ )  $\delta$  174.1, 81.5, 62.5, 57.7, 48.7, 28.0, 26.2, 21.2, 19.0. HRMS (ESI): calcd for  $\text{C}_{11}\text{H}_{23}\text{NO}_3\text{H}$  ( $\text{M}+\text{H}^+$ ) 218.1751, found 218.1747.  $[\alpha]_{\text{D}}^{20.2} +26$  (c 0.5,  $\text{CHCl}_3$ ).

### 5.3 Synthesis of compound 7.

The solution of **3ca** (40 mg, 0.136 mmol, 1 eq) in EtOH (0.7 mL) was added dropwise to the stirred solution of  $\text{NaBH}_4$  (5.7 mg, 0.15 mmol, 1.1 eq) in EtOH (0.3 mL) under argon atmosphere at 0 °C. The resulting mixture was further stirred at 0 °C for about 1 h, till the reaction completed as monitored by TLC. The reaction was subsequently quenched with saturated  $\text{NaHCO}_3$  solution and extracted with ethyl acetate. The combined organic extracts were washed with brine once, dried over anhydrous  $\text{Na}_2\text{SO}_4$  and concentrated in vacuum after filtration. The residue was purified by silica gel column chromatography (with petroleum ether/EtOAc = 4:1 as eluent) to afford compound **7** (24 mg, 71% yield). Colorless liquid.  $^1\text{H}$  NMR (400 MHz,  $\text{CDCl}_3$ )  $\delta$  6.82 (d,  $J = 8.9$  Hz, 2H), 6.65 (d,  $J = 8.9$  Hz, 2H), 4.43 – 4.30 (m, 2H), 4.16 – 3.98 (m, 2H), 3.77 (s, 3H), 2.79 – 2.75 (m, 1H), 2.00 – 1.92 (m, 1H), 0.95 (d,  $J = 7.0$  Hz, 3H), 0.83 (d,  $J = 6.8$  Hz, 3H).  $^{13}\text{C}$  NMR (100 MHz,  $\text{CDCl}_3$ )  $\delta$  176.7, 152.9, 141.1, 115.0, 114.2, 67.0, 56.2, 55.7, 45.2, 25.0, 21.1, 17.4. HRMS (ESI): calcd for  $\text{C}_{14}\text{H}_{19}\text{NO}_3\text{Na}$  ( $\text{M}+\text{Na}^+$ ) 272.1257, found 272.1254.  $[\alpha]_{\text{D}}^{18.3} +94$  (c 0.5,  $\text{CHCl}_3$ ). The enantiomeric excess (94% *ee*) was determined by HPLC with a Daicel Chiralpak AS-H column (hexane/*i*-PrOH = 80:20, flow rate: 0.5 mL/min,  $\lambda_{\text{max}}$  240 nm):  $t_{\text{R}}$  (*anti* minor enantiomer) = 34.8 min;  $t_{\text{R}}$  (*anti* major enantiomer) = 51.7 min.

## 6. Synthesis of Compound 4b.

The solution of **1a** (41.8 mg, 0.2 mmol) and  $\text{Ru}(\text{bpy})_3\text{Cl}_2 \cdot 6\text{H}_2\text{O}$  (3 mg, 2 mol%) in dry  $\text{CH}_3\text{CN}$  (3 mL) was irradiated with a 5 W blue LED bulb under air atmosphere at room temperature. After full conversion of **1a** as monitored by TLC, the solvent was removed under vacuo, and the residue was separated by silica gel column chromatography (with petroleum ether/EtOAc = 4/1 as eluent) to afford the product **4b** (32 mg, 71% yield).

**Ethyl 2-((4-methoxyphenyl)amino)-2-oxoacetate.**<sup>7</sup> White solid.  $^1\text{H}$  NMR (400 MHz,  $\text{CDCl}_3$ )  $\delta$  8.83 (brs, 1H), 7.57 (d,  $J = 9.0$  Hz, 2H), 6.90 (d,  $J = 9.0$  Hz, 2H), 4.41 (q,  $J = 7.1$  Hz, 2H), 3.81 (s, 3H), 1.42 (t,  $J = 7.2$  Hz, 3H).  $^{13}\text{C}$  NMR (100 MHz,  $\text{CDCl}_3$ )  $\delta$  161.1, 157.1, 153.6, 129.5, 121.3, 114.3, 63.6, 55.4, 14.0. HRMS (ESI): calcd for  $\text{C}_{11}\text{H}_{14}\text{NO}_4$  ( $\text{M}+\text{H}^+$ ) 224.0917, found 224.0918.

## 7. References

1. H. Zhang, M. Mifsud, F. Tanaka and C. F. Barbas, III, *J. Am. Chem. Soc.*, 2006, **128**, 9630-9631.
2. J. Xie and Z.-Z. Huang, *Angew. Chem., Int. Ed.*, 2010, **49**, 10181-10185.
3. R. Martín-Rapún, S. Sayalero and M. A. Pericàs, *Green Chem.*, 2013, **15**, 3295-3301.
4. H. Zhang, S. Mitsumori, N. Utsumi, M. Imai, N. Garcia-Delgado, M. Mifsud, K. Albertshofer, P. H.-Y. Cheong, K. N. Houk, F. Tanaka and C. F. Barbas, III, *J. Am. Chem. Soc.*, 2008, **130**, 875-886.
5. S. Mitsumori, H. Zhang, P. H. Y. Cheong, K. N. Houk, F. Tanaka and C. F. Barbas, *J. Am. Chem. Soc.*, 2006, **128**, 1040-1041.
6. L. Zhao, O. Basle and C.-J. Li, *Proc. Natl. Acad. Sci. U. S. A.*, 2009, **106**, 4106-4111.
7. C. Huo, Y. Yuan, M. Wu, X. Jia, X. Wang, F. Chen and J. Tang, *Angew. Chem., Int. Ed.*, 2014, **53**, 13544-13547.



## 8. Copies of $^1\text{H}$ , $^{13}\text{C}$ and $^{19}\text{F}$ NMR Spectra

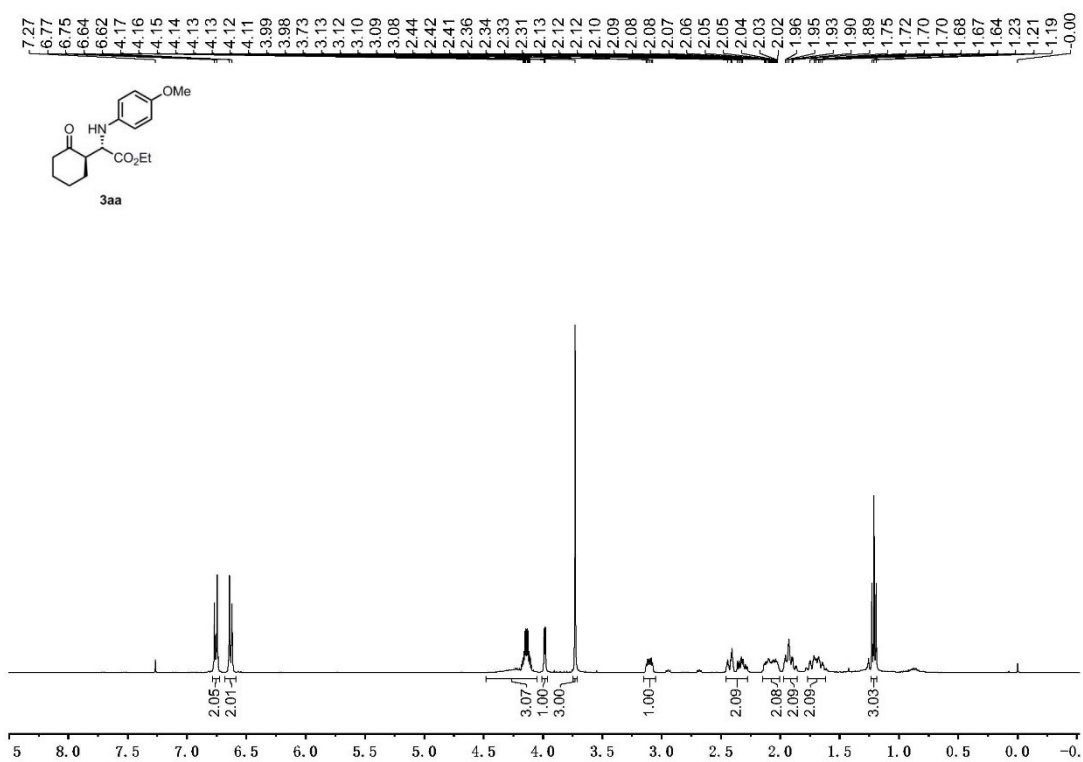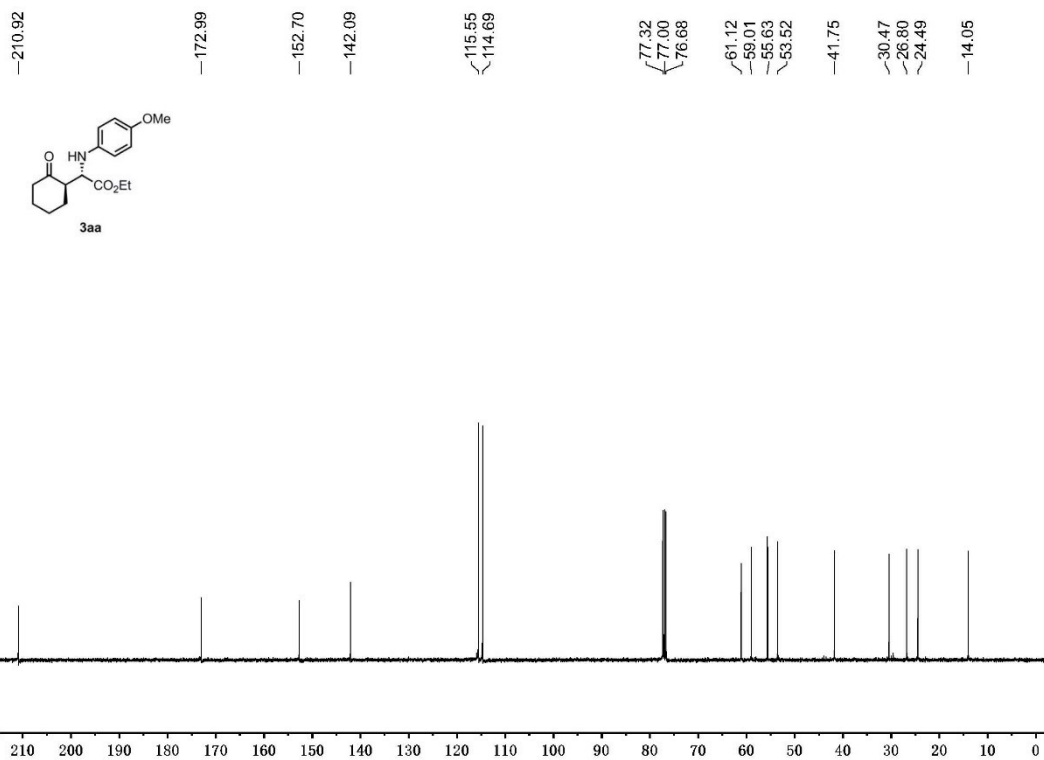

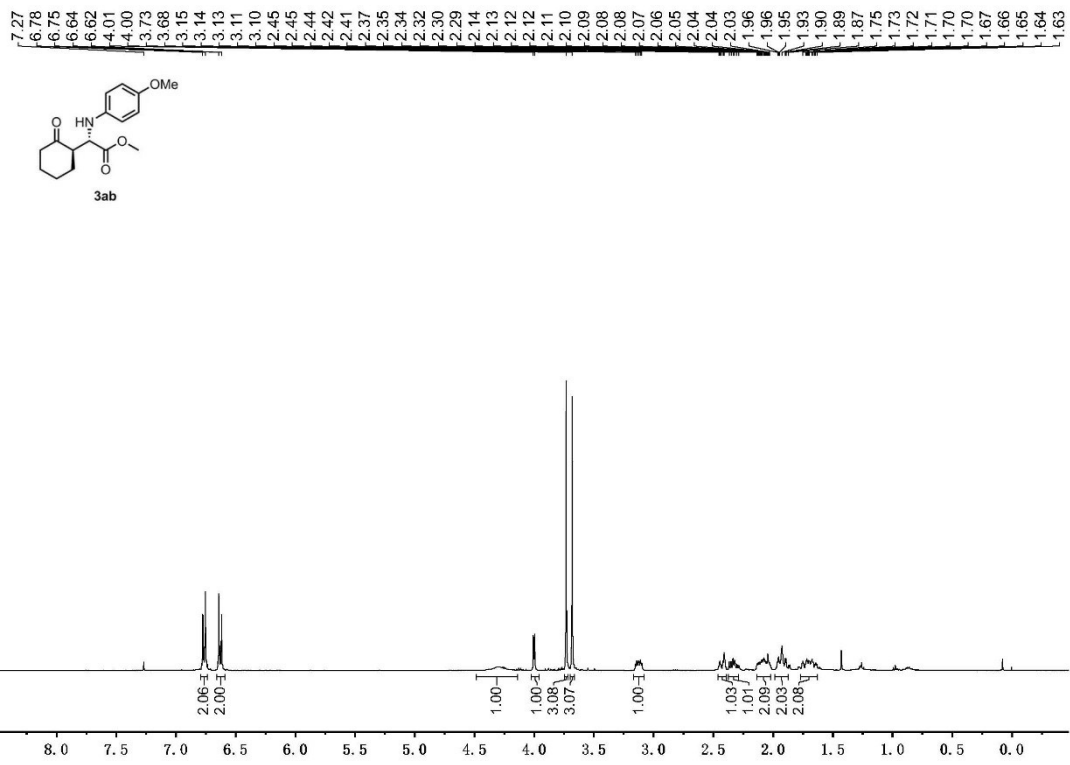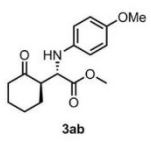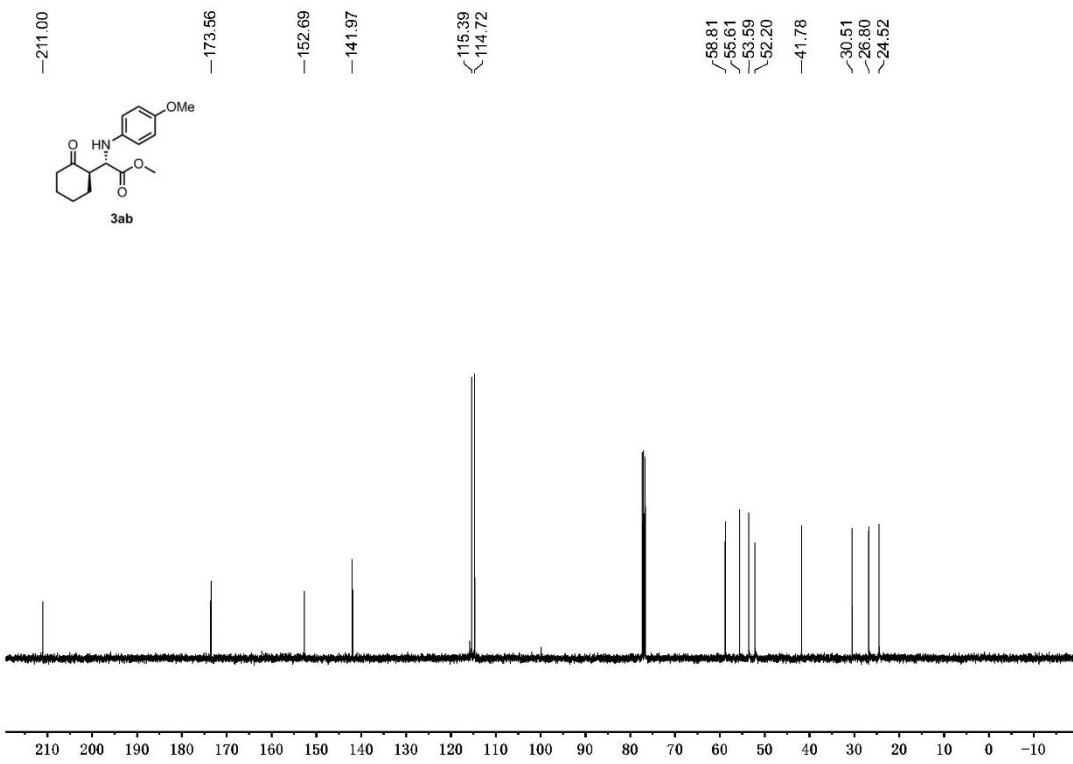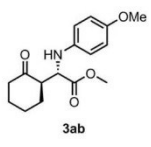

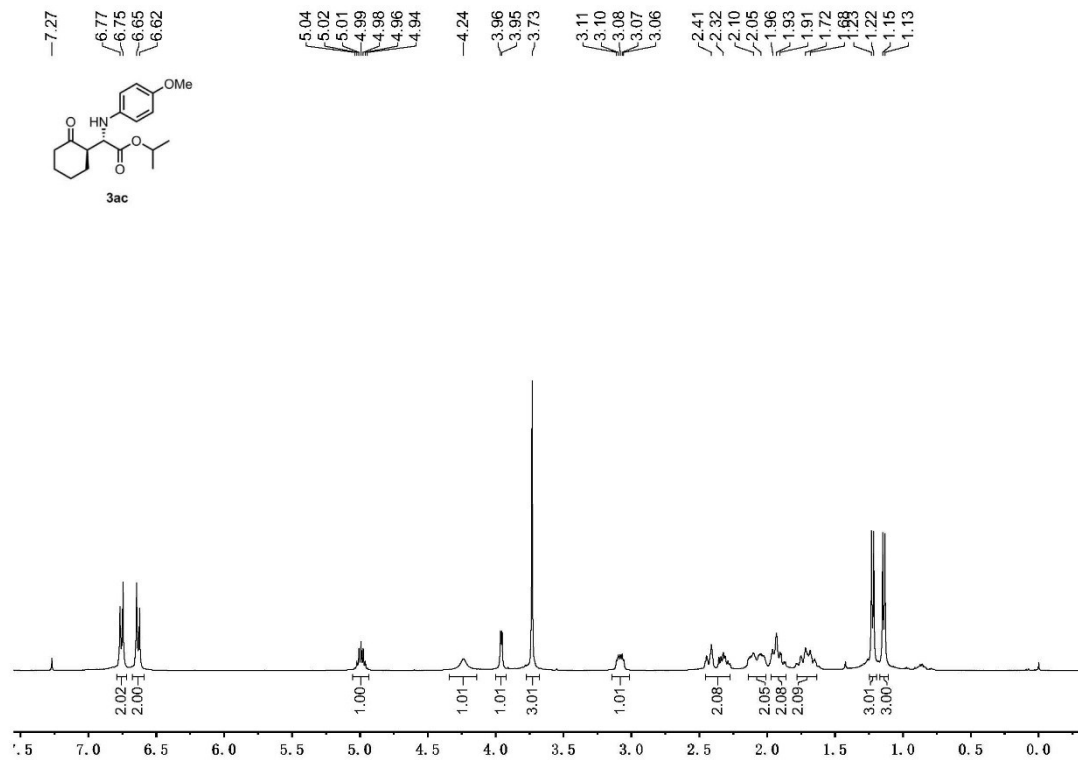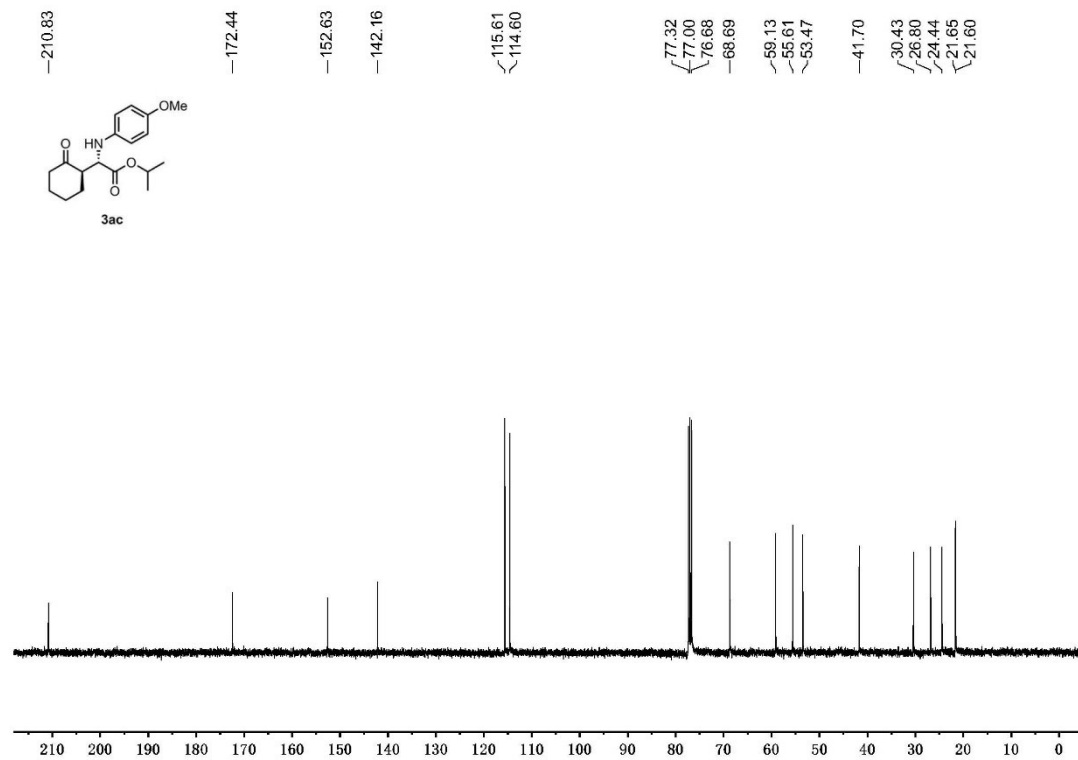

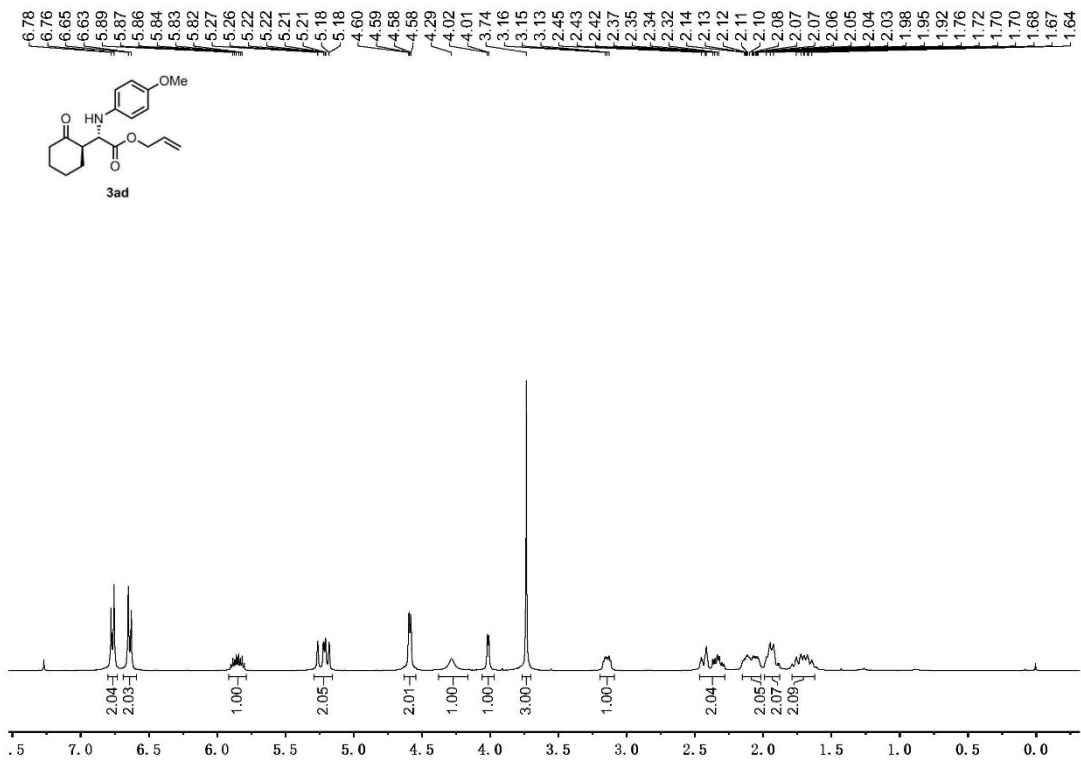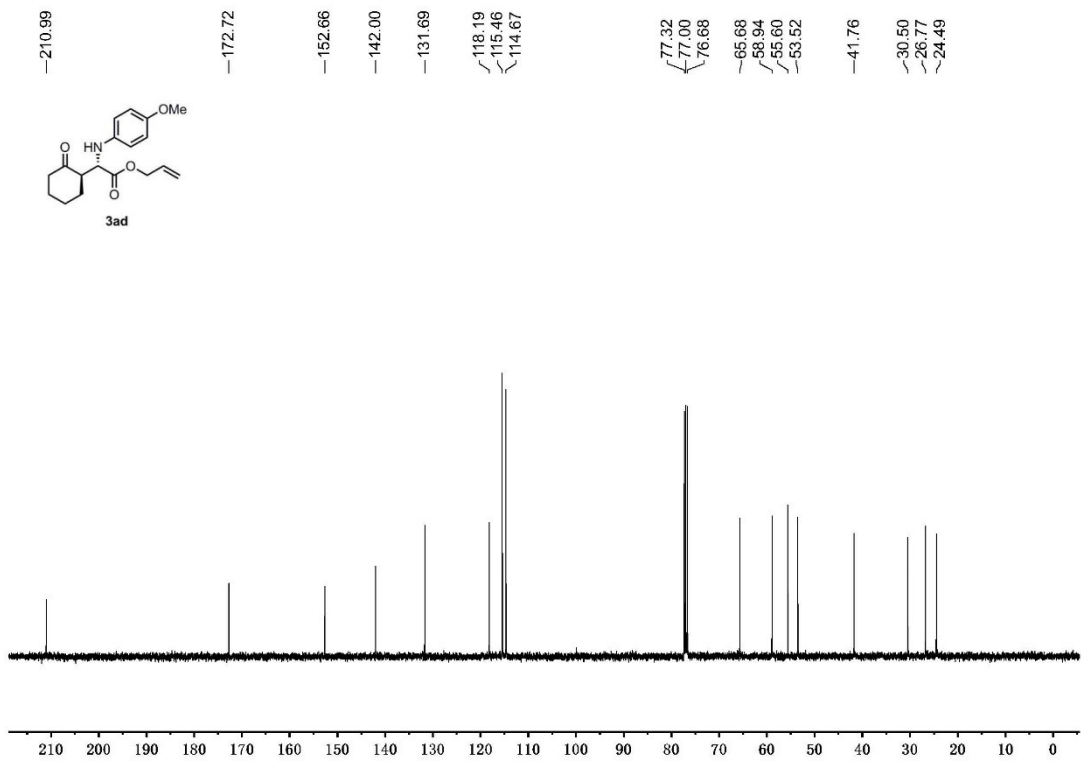

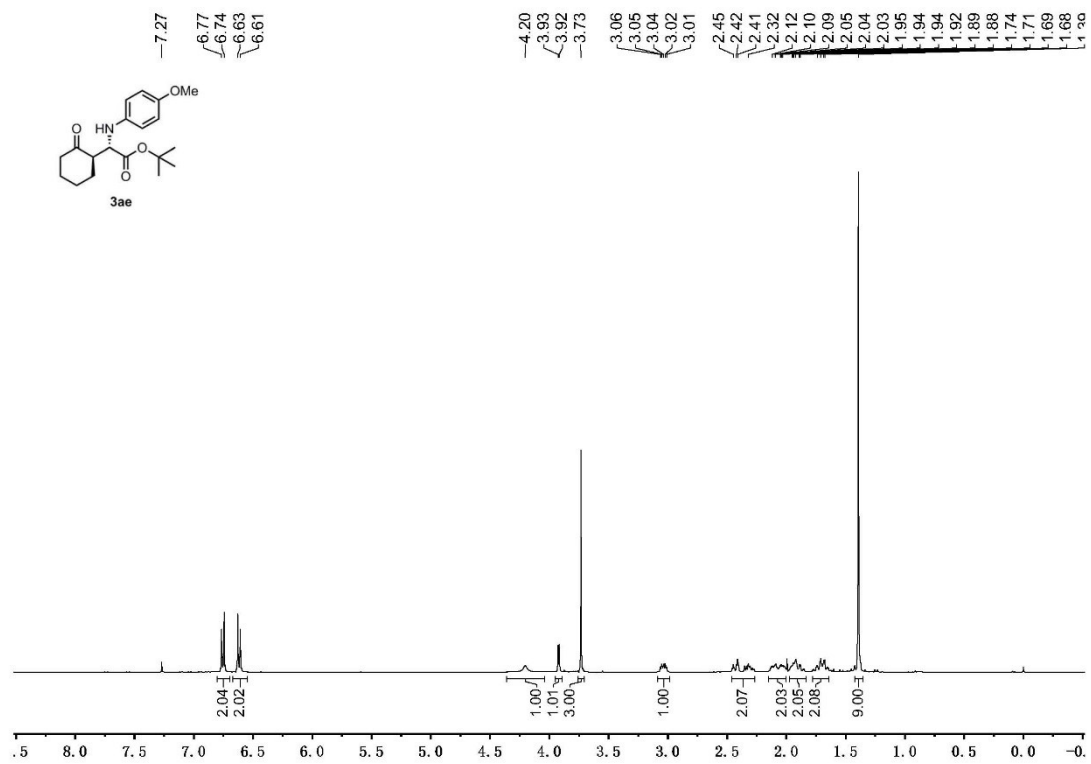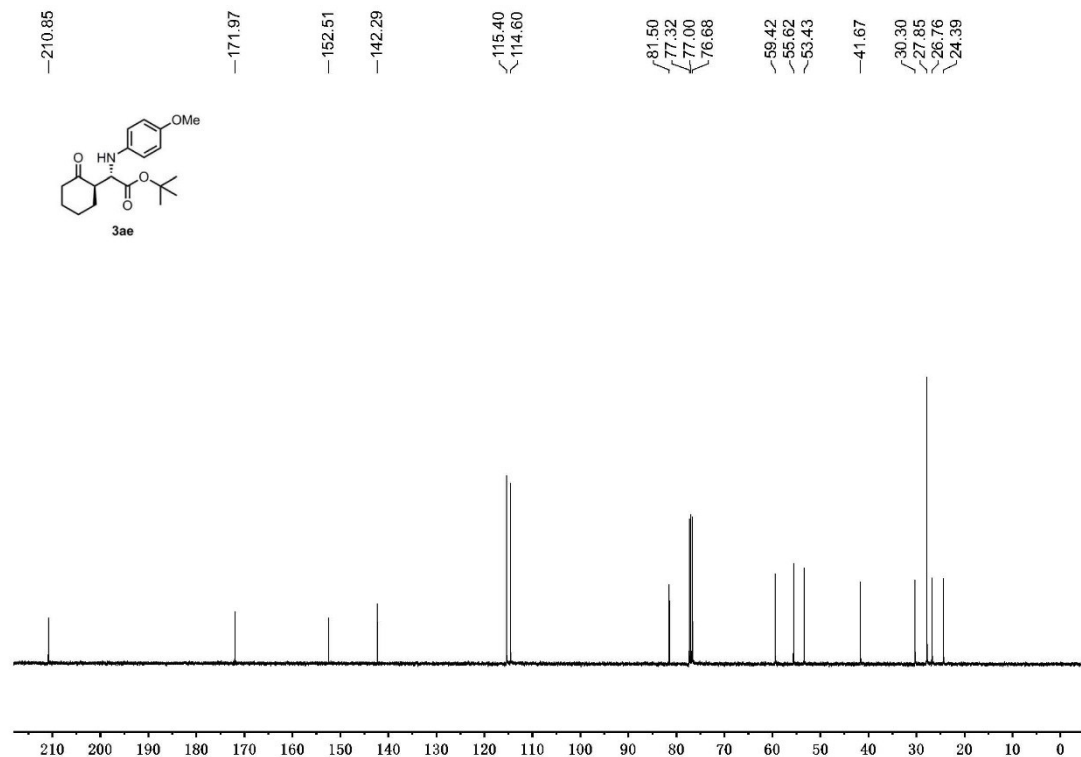

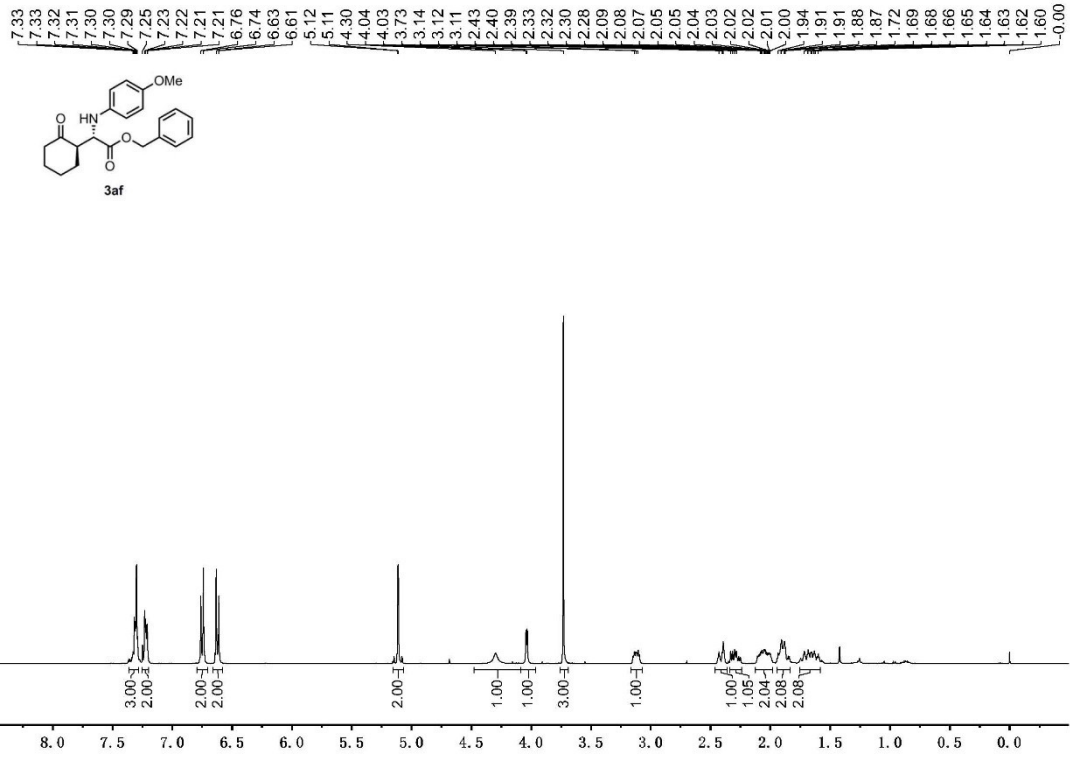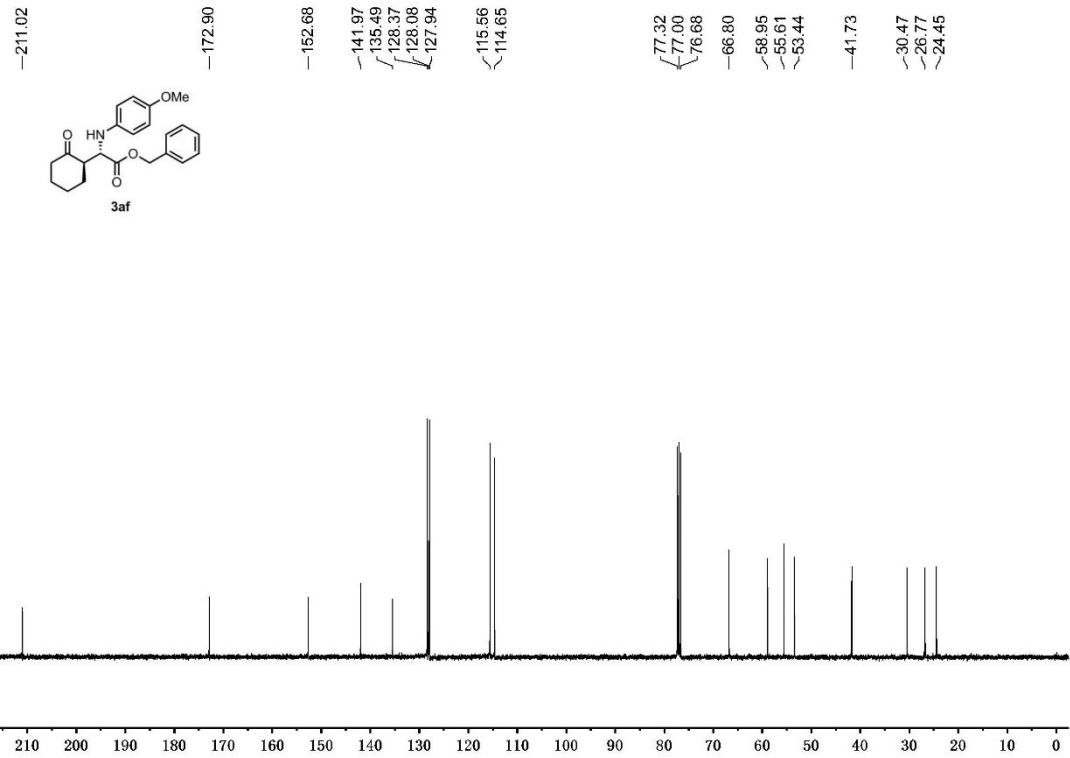

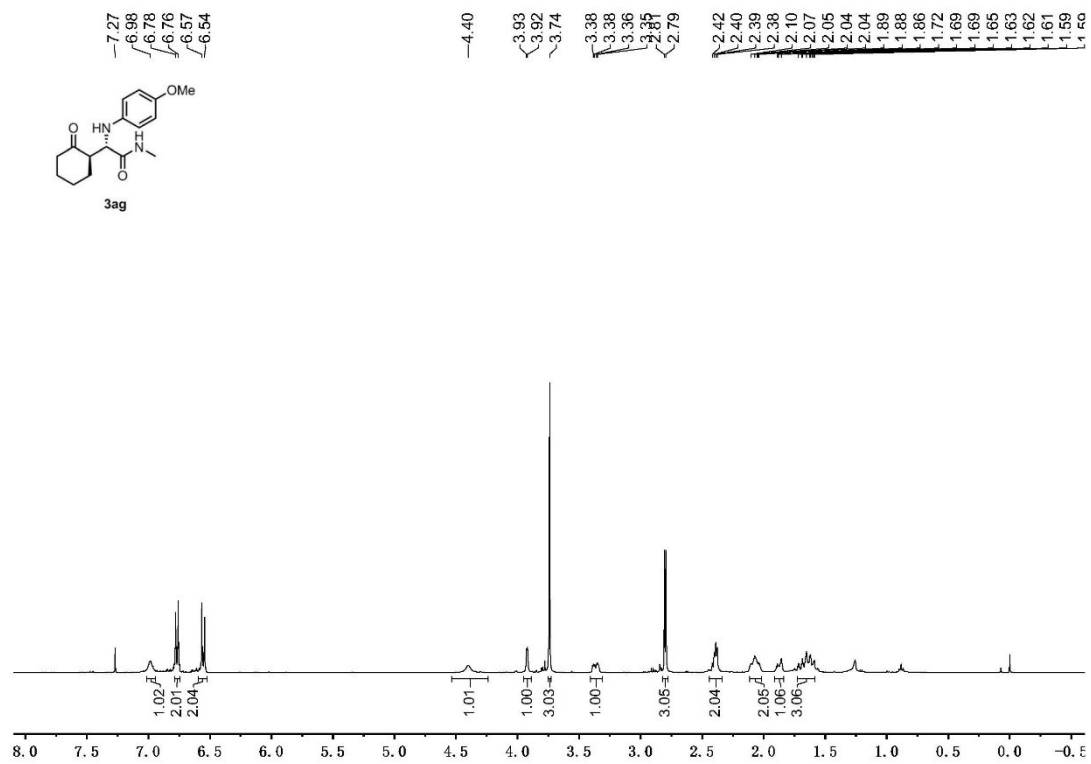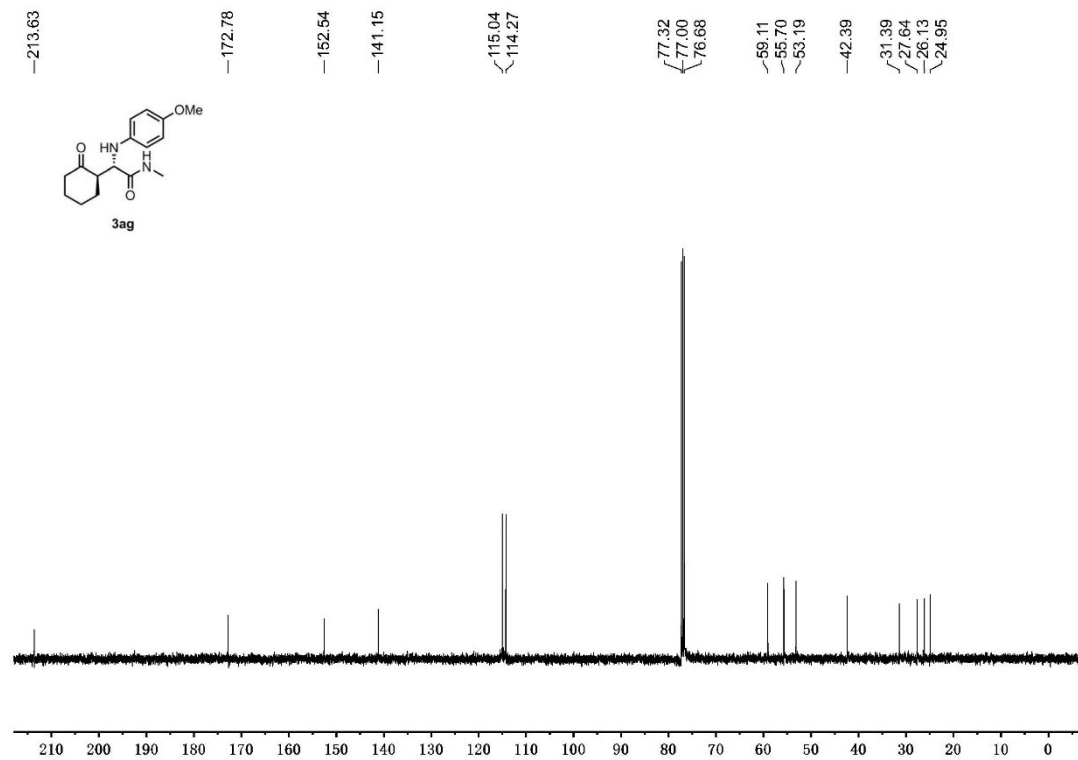

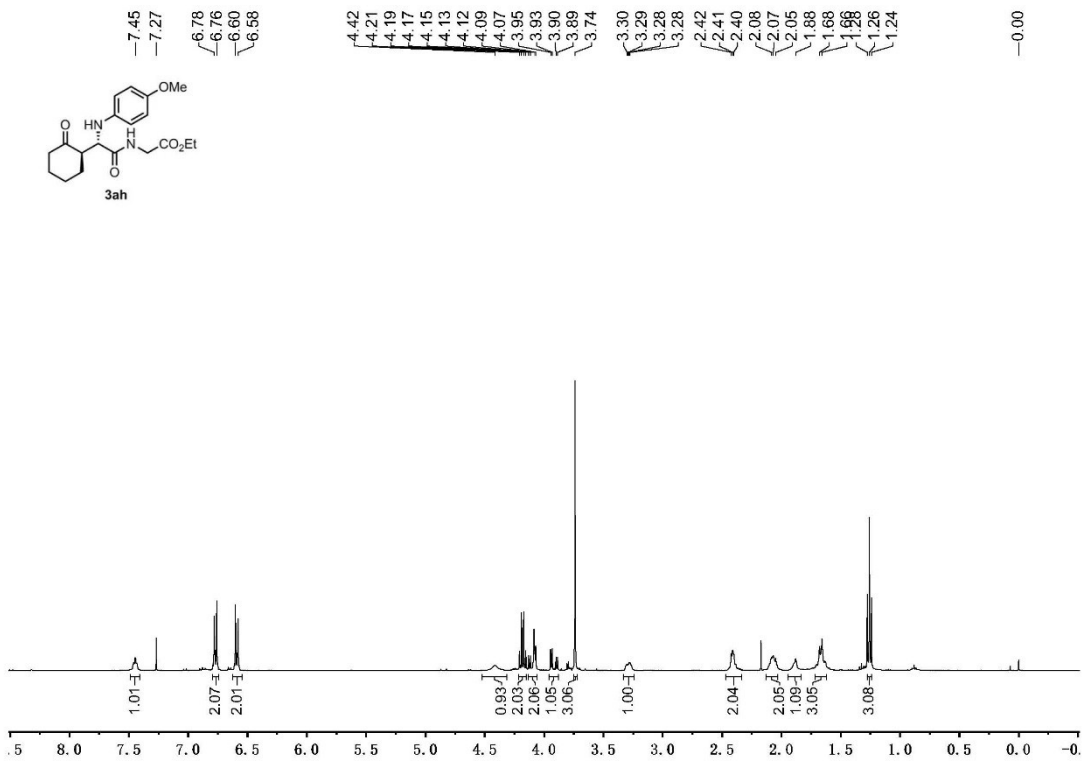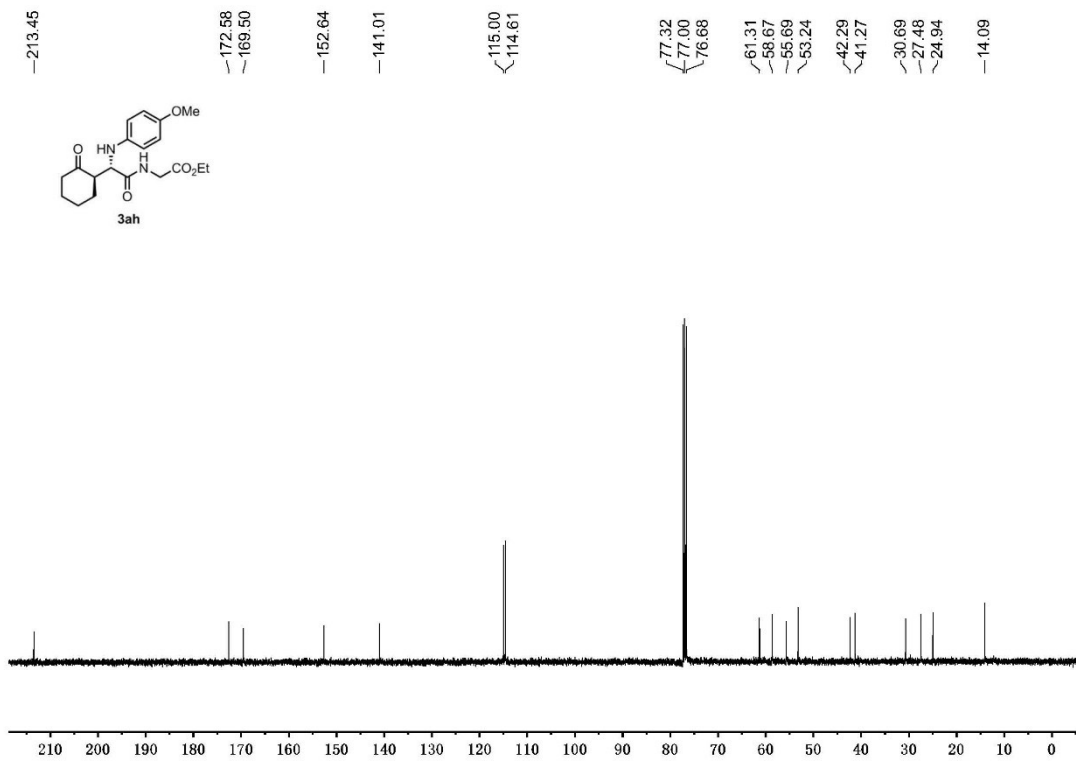



7.27  
7.00  
6.98  
6.60  
6.58  
4.20  
4.19  
4.18  
4.16  
4.14  
4.13  
4.12  
4.11  
4.09  
4.08  
3.16  
3.14  
3.13  
2.46  
2.43  
2.42  
2.37  
2.36  
2.35  
2.34  
2.33  
2.24  
2.14  
2.13  
2.12  
2.11  
2.08  
2.07  
2.06  
2.05  
2.04  
1.96  
1.95  
1.94  
1.93  
1.91  
1.91  
1.88  
1.88  
1.75  
1.73  
1.72  
1.71  
1.70  
1.69  
1.68  
1.67  
1.65  
1.25  
1.23  
1.21

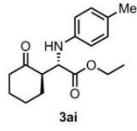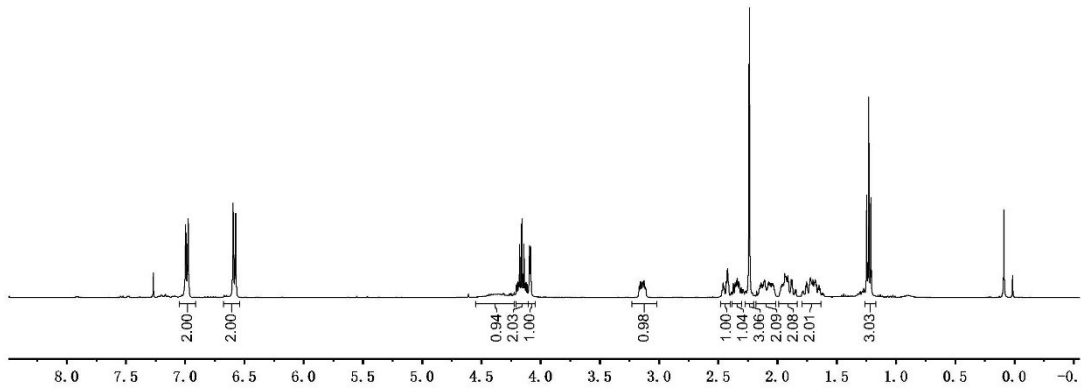

-210.93  
-172.86  
-145.66  
-129.69  
-127.53  
-113.97  
77.32  
77.00  
76.68  
61.18  
57.96  
53.57  
41.77  
30.40  
26.79  
24.51  
20.34  
14.09

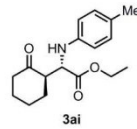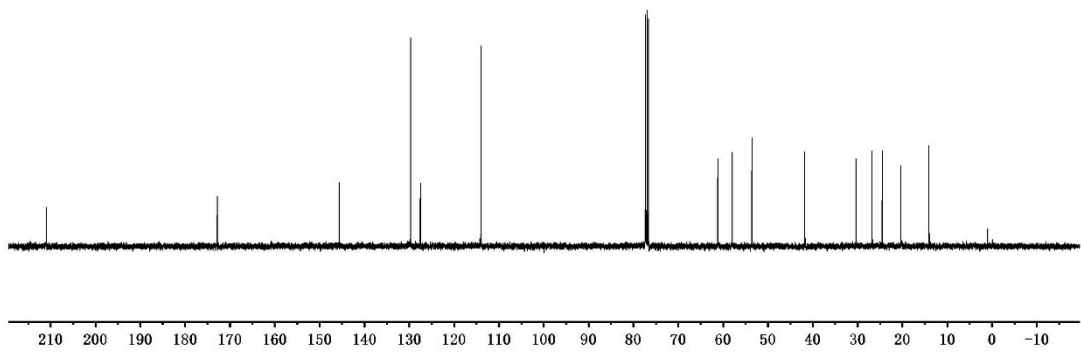

7.27  
7.12  
7.10  
6.59  
6.56  
4.19  
4.18  
4.17  
4.16  
4.15  
4.14  
4.14  
4.13  
4.04  
4.03  
3.18  
3.17  
3.17  
3.15  
2.46  
2.43  
2.42  
2.38  
2.37  
2.35  
2.34  
2.14  
2.13  
2.12  
2.11  
2.11  
2.10  
2.09  
2.09  
2.08  
2.07  
2.06  
2.05  
1.96  
1.95  
1.94  
1.93  
1.88  
1.87  
1.85  
1.84  
1.77  
1.76  
1.74  
1.73  
1.72  
1.70  
1.68  
1.67  
1.64  
1.24  
1.22  
1.20

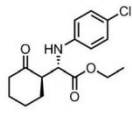

3aj

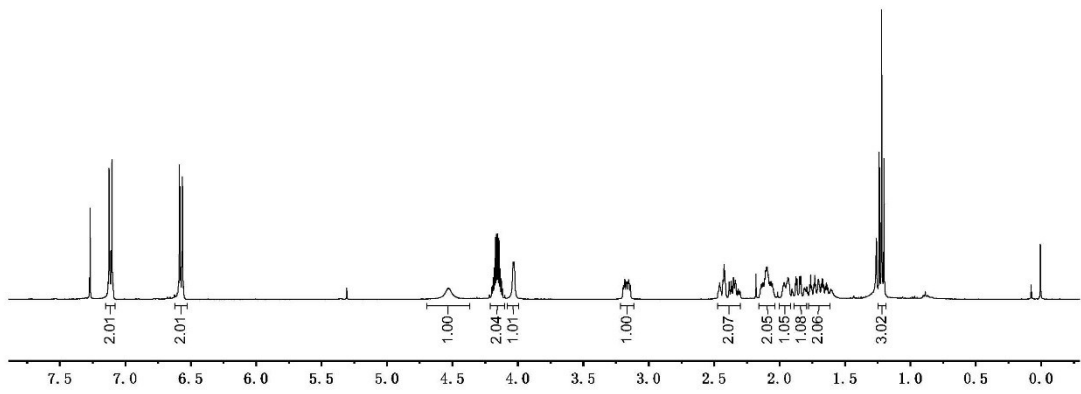

-211.05  
-172.44  
-146.63  
-129.05  
-122.86  
-114.88  
77.32  
77.00  
76.68  
61.41  
57.68  
53.45  
41.86  
30.60  
26.89  
24.60  
14.10

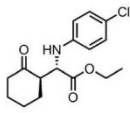

3aj

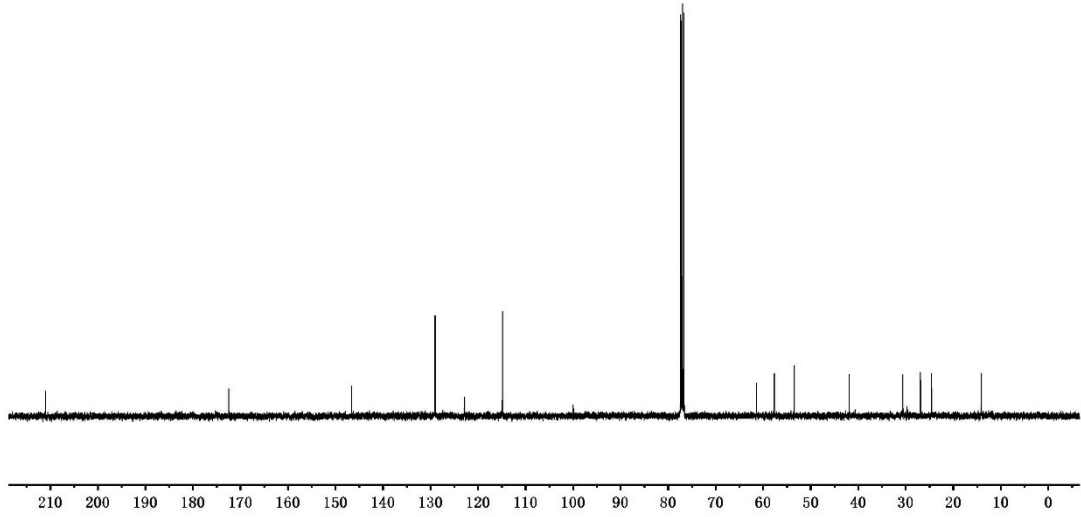

7.27  
7.26  
7.23  
6.54  
6.52  
4.19  
4.18  
4.17  
4.16  
4.14  
4.14  
4.13  
4.04  
4.03  
3.19  
3.18  
3.17  
3.16  
3.15  
2.46  
2.43  
2.42  
2.39  
2.37  
2.35  
2.34  
2.13  
2.12  
2.11  
2.10  
2.10  
2.09  
2.07  
2.06  
2.06  
1.96  
1.94  
1.94  
1.93  
1.87  
1.86  
1.84  
1.83  
1.80  
1.77  
1.76  
1.74  
1.73  
1.70  
1.68  
1.67  
1.66  
1.64  
1.24  
1.22  
1.20  
0.01

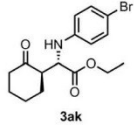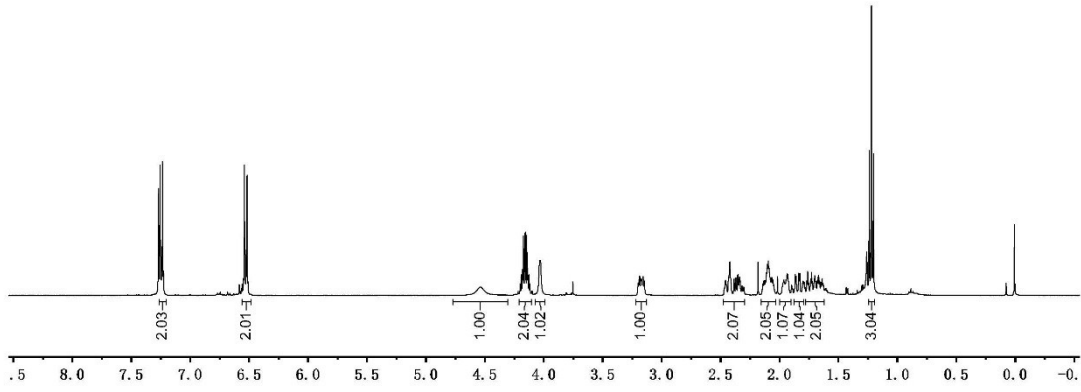

— 211.08  
— 172.38  
— 147.05  
— 131.93  
— 115.31  
— 109.89  
77.32  
77.00  
76.68  
— 61.43  
— 57.50  
— 53.44  
— 41.87  
— 30.59  
— 26.88  
— 24.60  
— 14.10

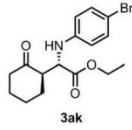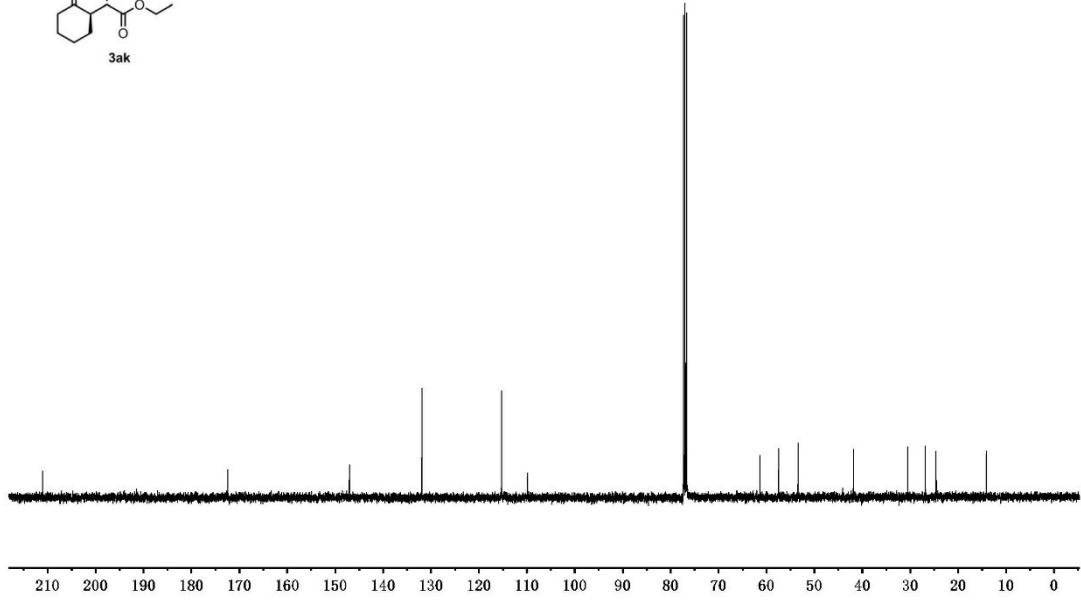

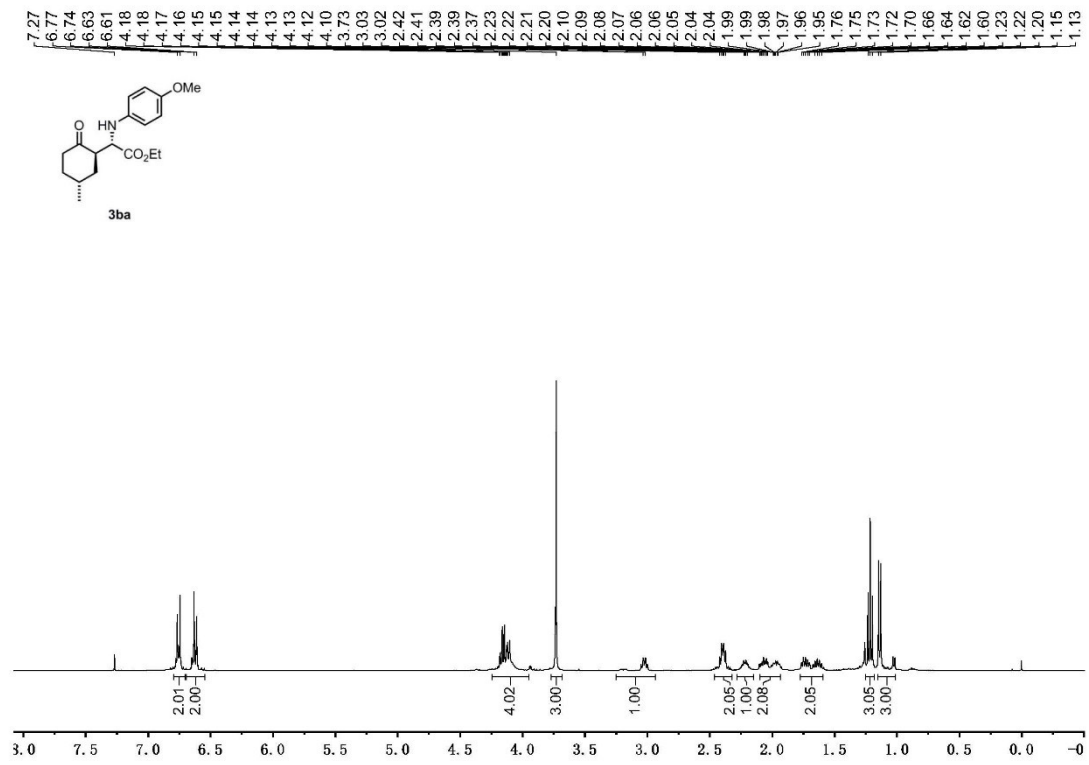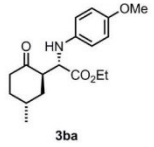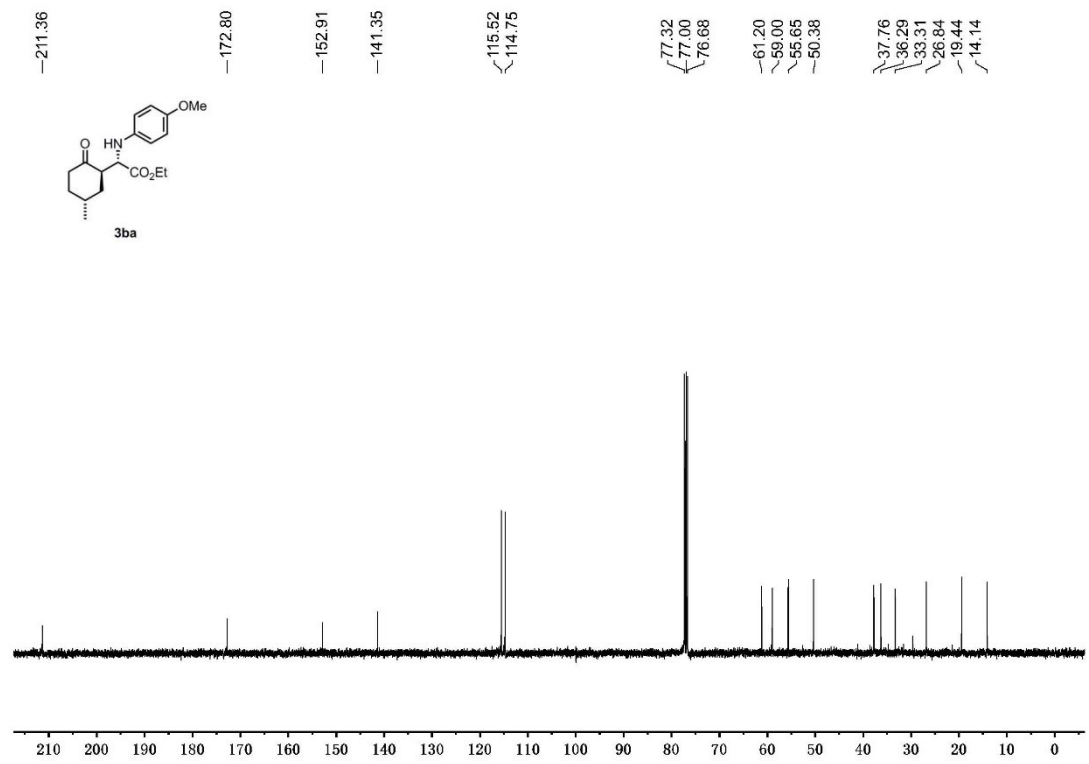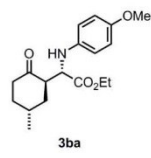

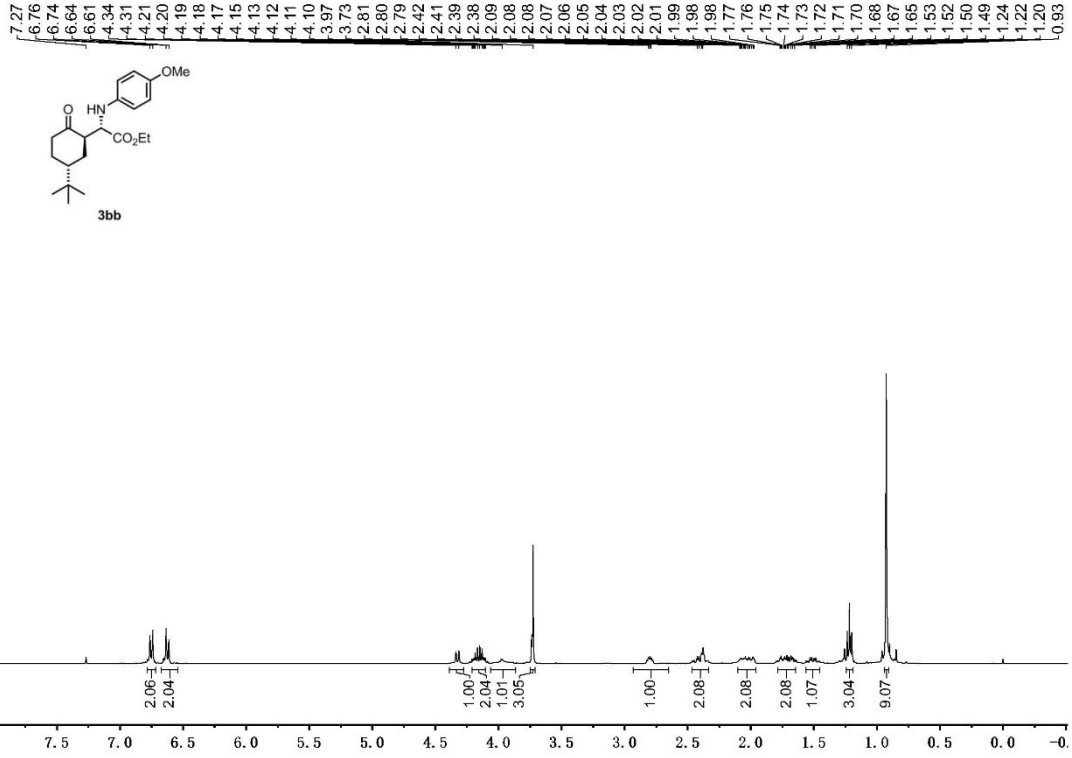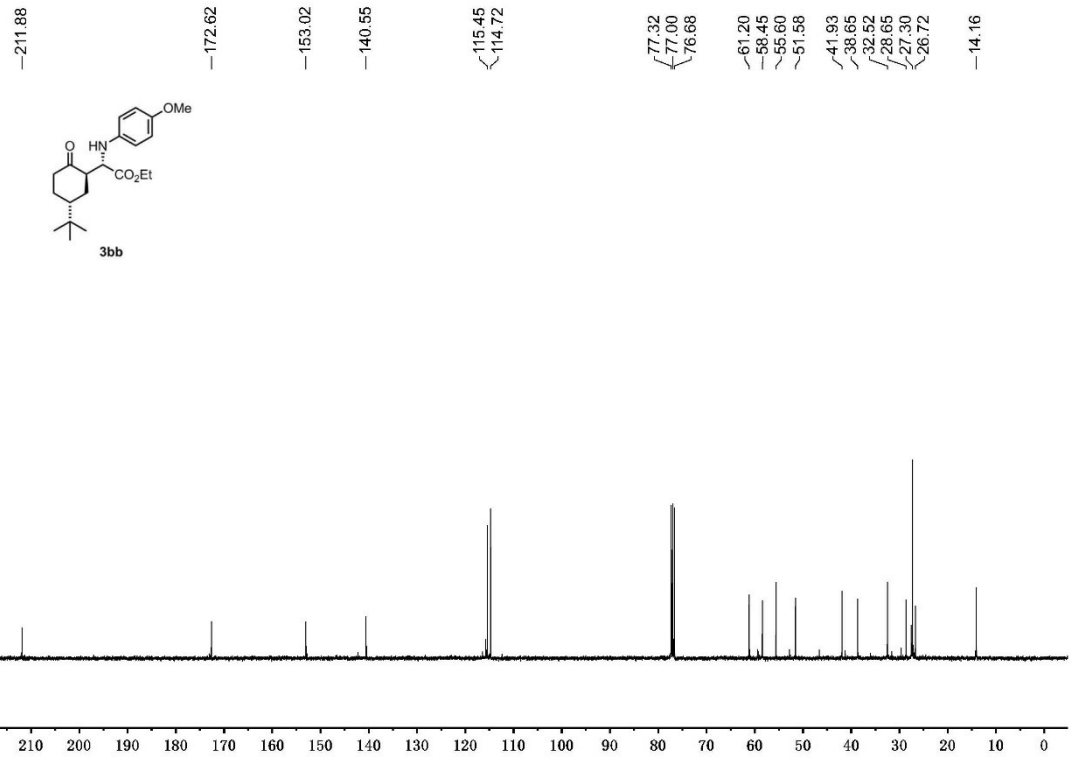

7.27  
6.77  
6.75  
6.65  
6.63  
4.27  
4.25  
4.23  
4.21  
4.18  
4.17  
4.16  
4.14  
4.14  
4.12  
4.11  
3.94  
3.93  
3.73  
3.37  
3.36  
3.34  
2.95  
2.94  
2.93  
2.53  
2.52  
2.51  
2.49  
2.48  
2.46  
2.46  
2.45  
2.44  
2.41  
2.41  
2.39  
2.38  
2.37  
2.35  
2.34  
2.24  
2.23  
2.21  
2.21  
2.20  
2.18  
1.97  
1.96  
1.94  
1.93  
1.92  
1.32  
1.31  
1.29  
1.22  
1.19

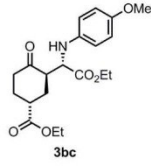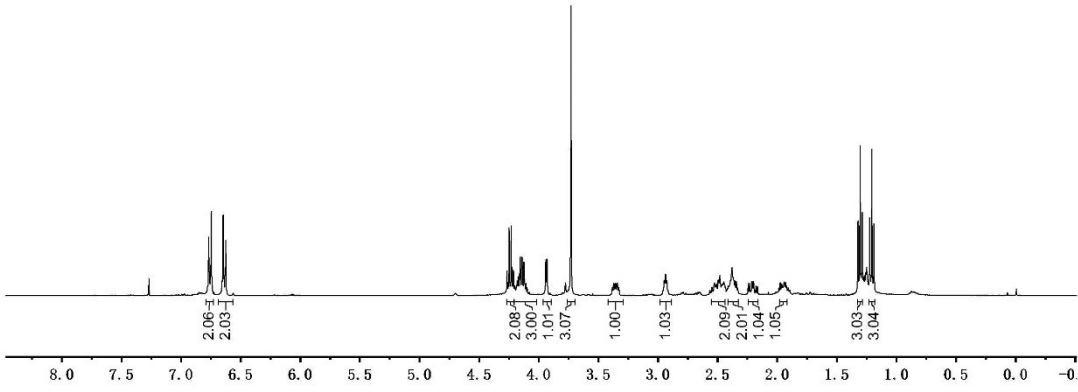

-210.10  
173.93  
172.62  
152.83  
142.00  
115.66  
114.69  
77.32  
77.00  
76.68  
61.24  
60.90  
59.04  
55.62  
50.15  
38.43  
38.12  
30.99  
27.56  
14.20  
14.05

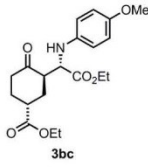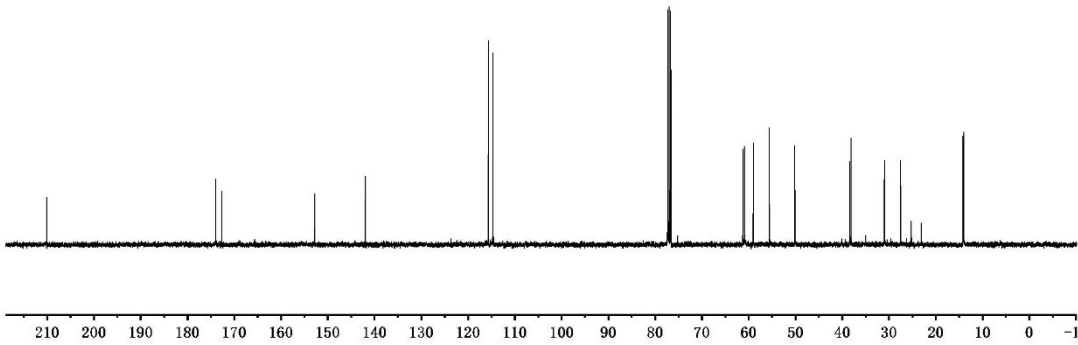

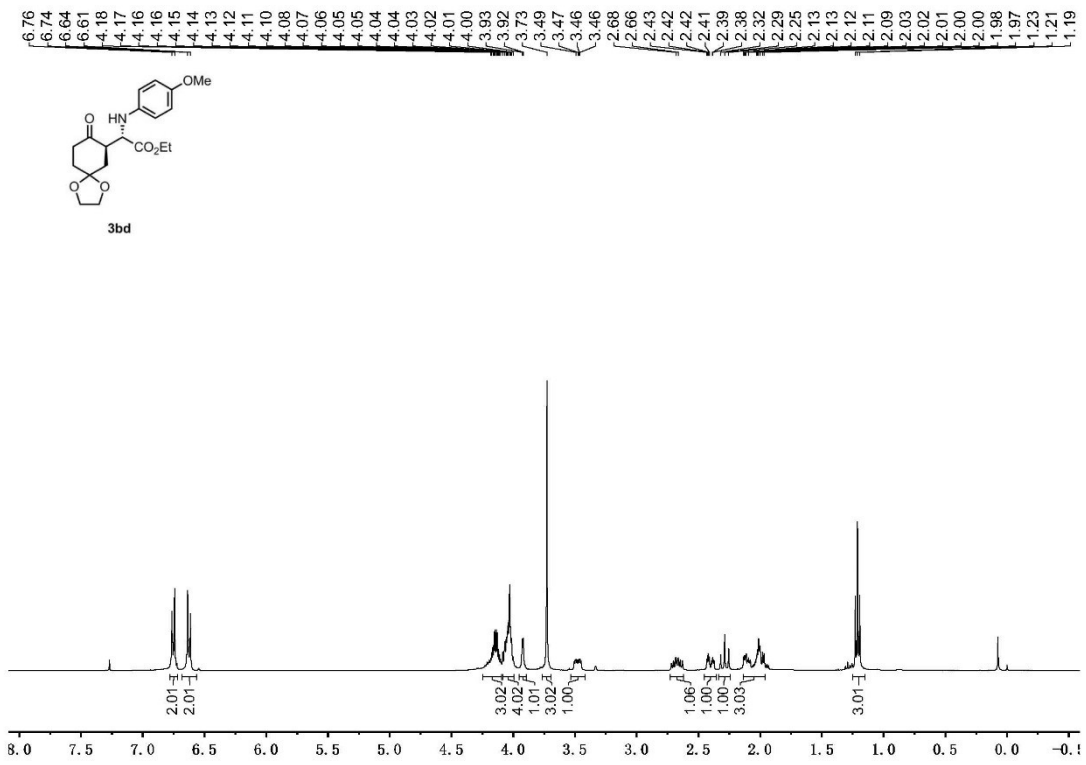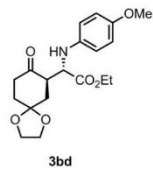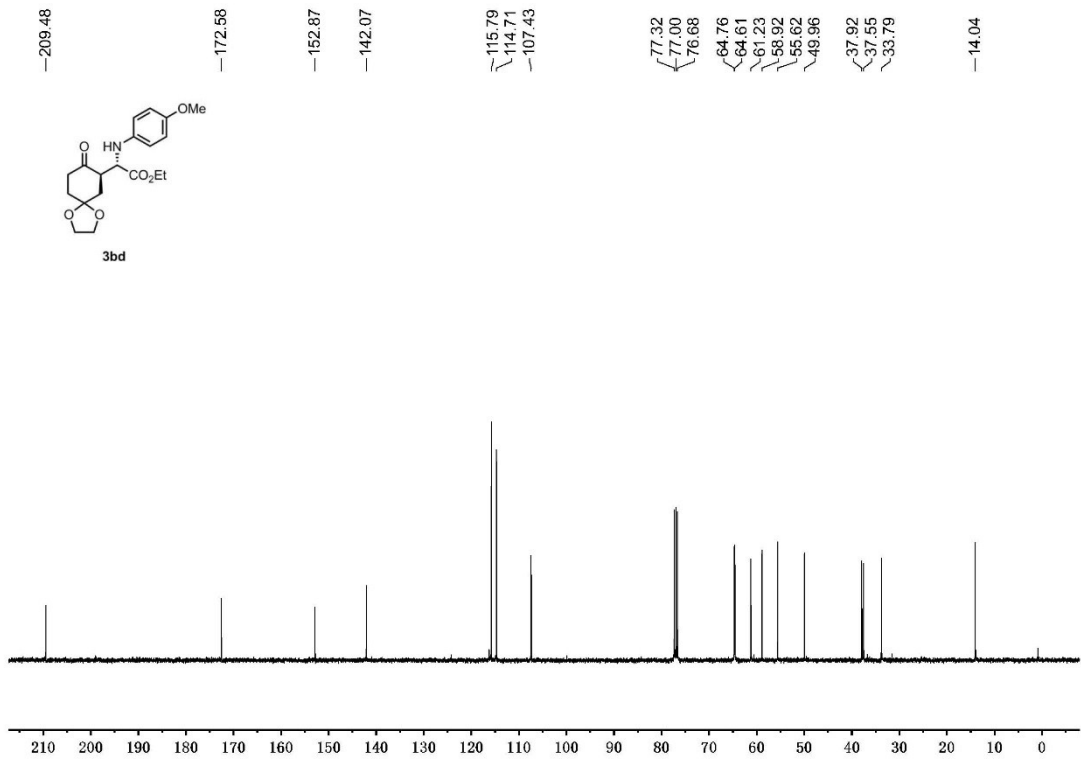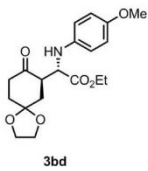

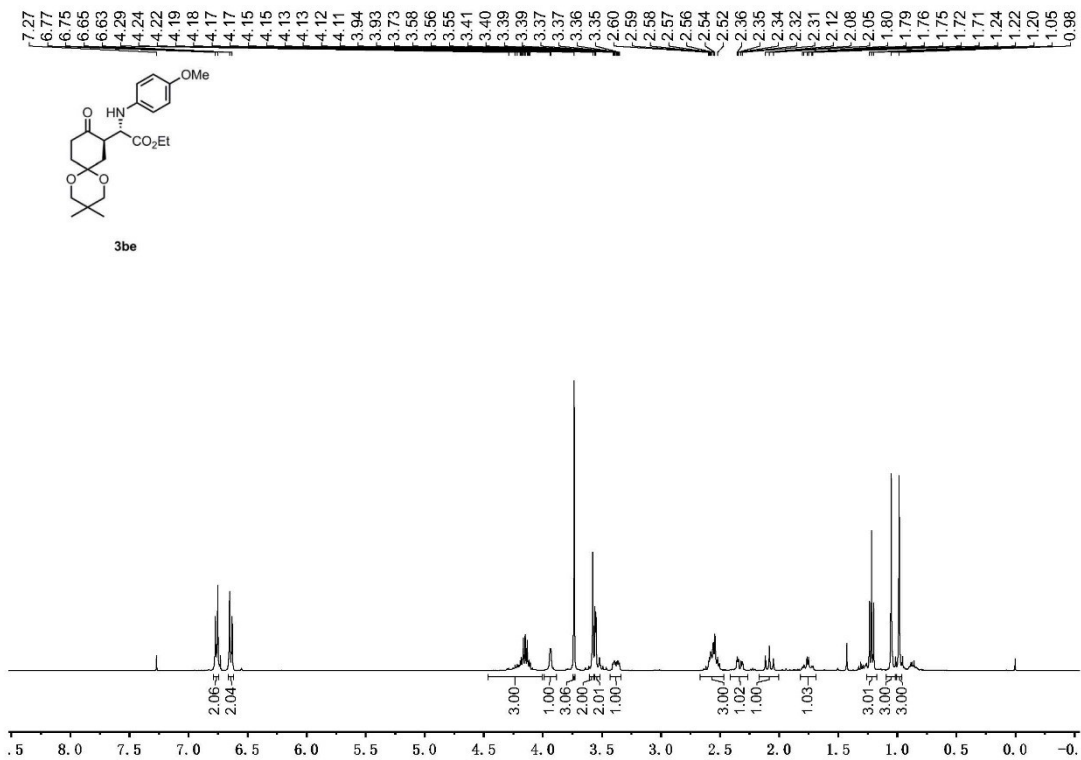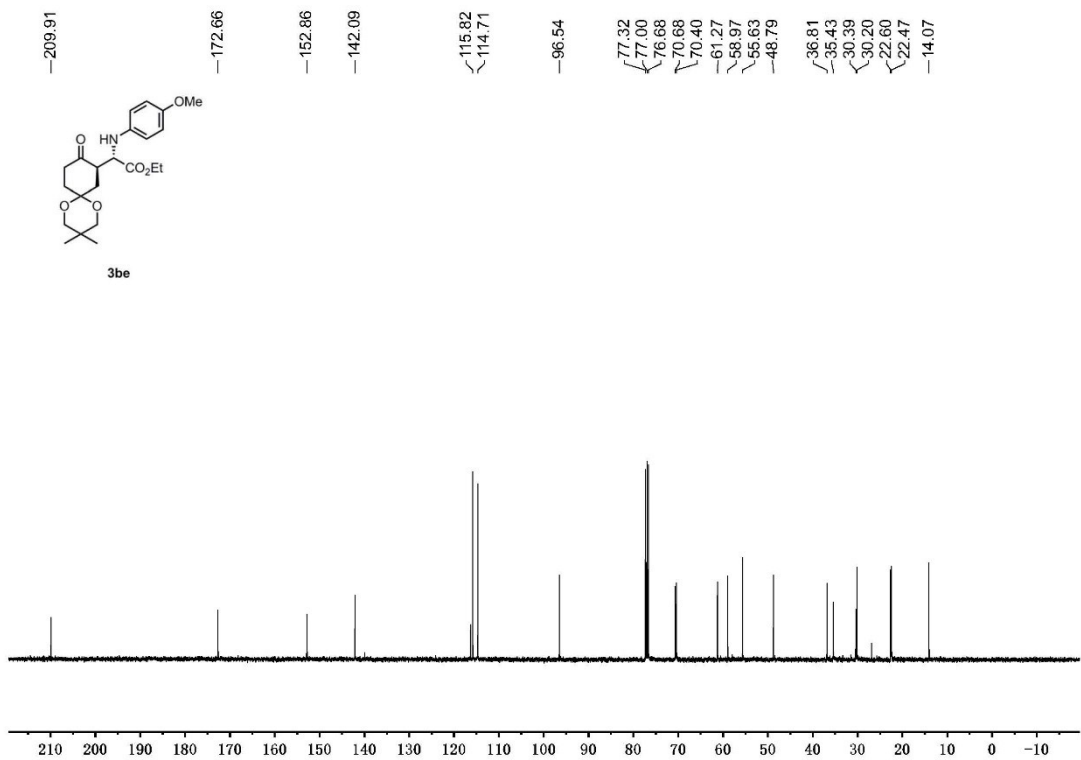



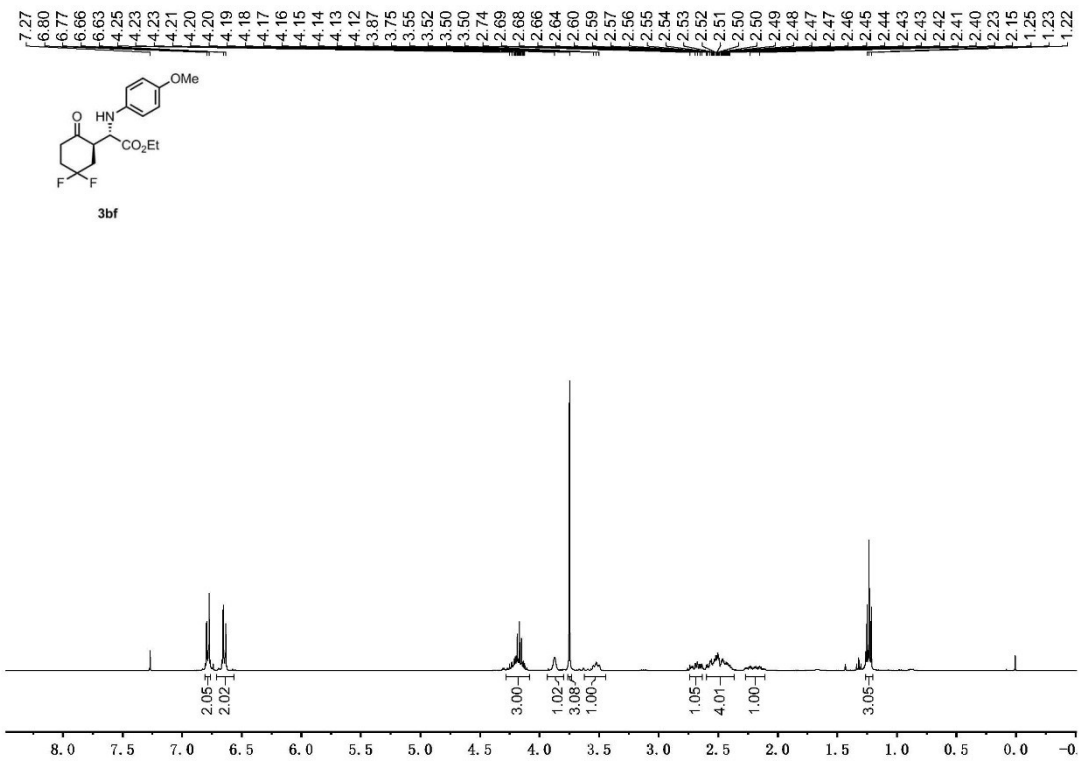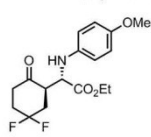

3bf

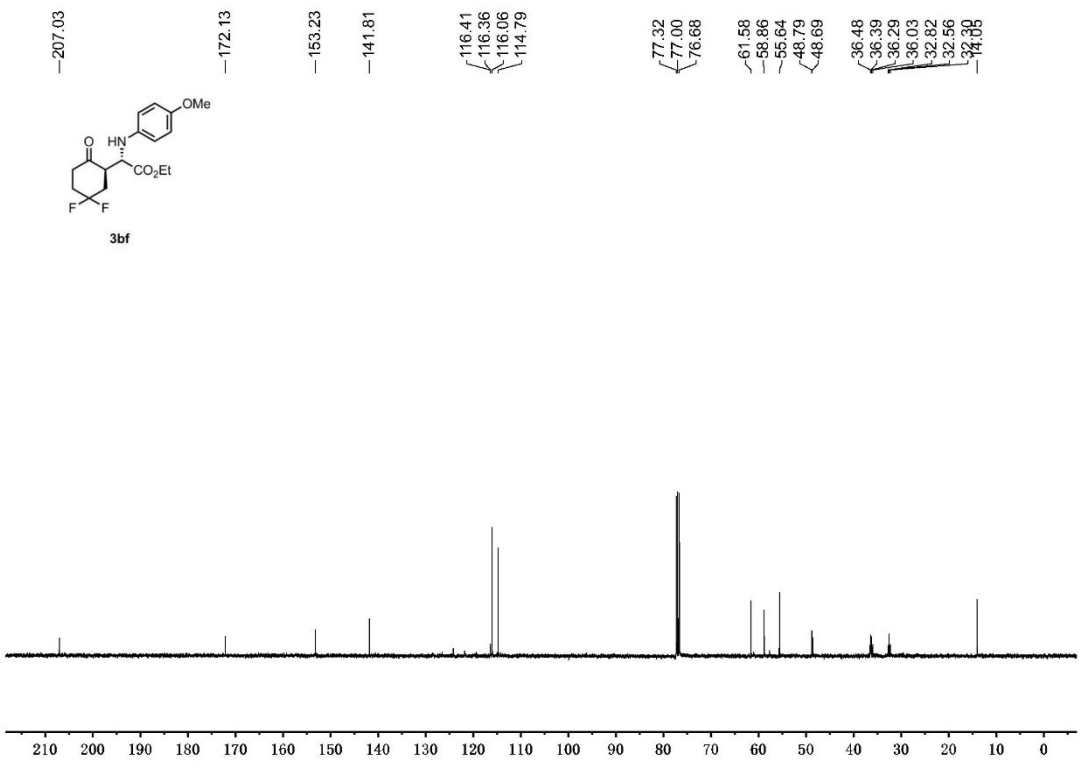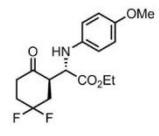

3bf

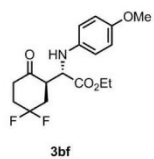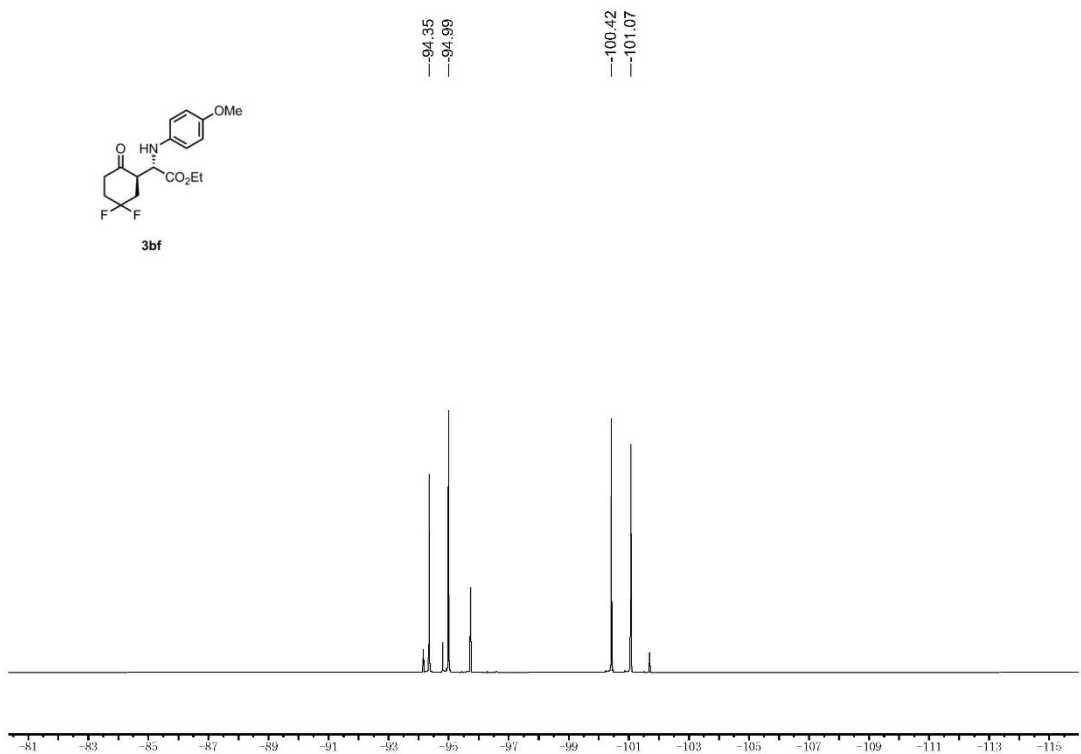

7.27  
 -6.78  
 -6.76  
 6.65  
 -6.63  
 4.25  
 4.20  
 4.19  
 4.18  
 4.17  
 4.15  
 4.15  
 4.13  
 4.11  
 3.87  
 3.86  
 3.74  
 3.30  
 3.30  
 3.28  
 3.27  
 3.26  
 2.50  
 2.48  
 2.46  
 2.46  
 2.45  
 2.32  
 2.31  
 2.31  
 2.30  
 2.28  
 2.27  
 2.27  
 1.98  
 1.95  
 1.91  
 1.79  
 1.78  
 1.78  
 1.77  
 1.77  
 1.76  
 1.75  
 1.74  
 1.74  
 1.71  
 1.70  
 1.69  
 1.68  
 1.68  
 1.67  
 1.65  
 1.64  
 1.25  
 1.24  
 1.22  
 1.20  
 1.05

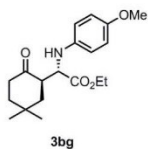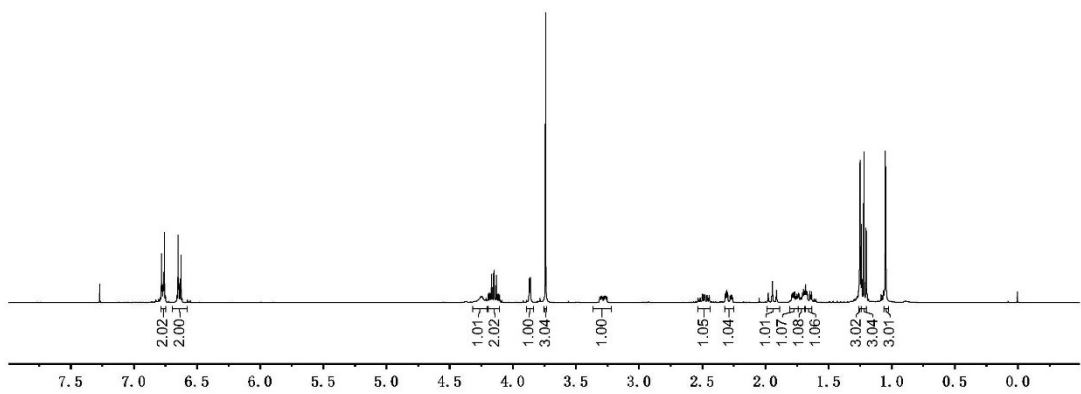

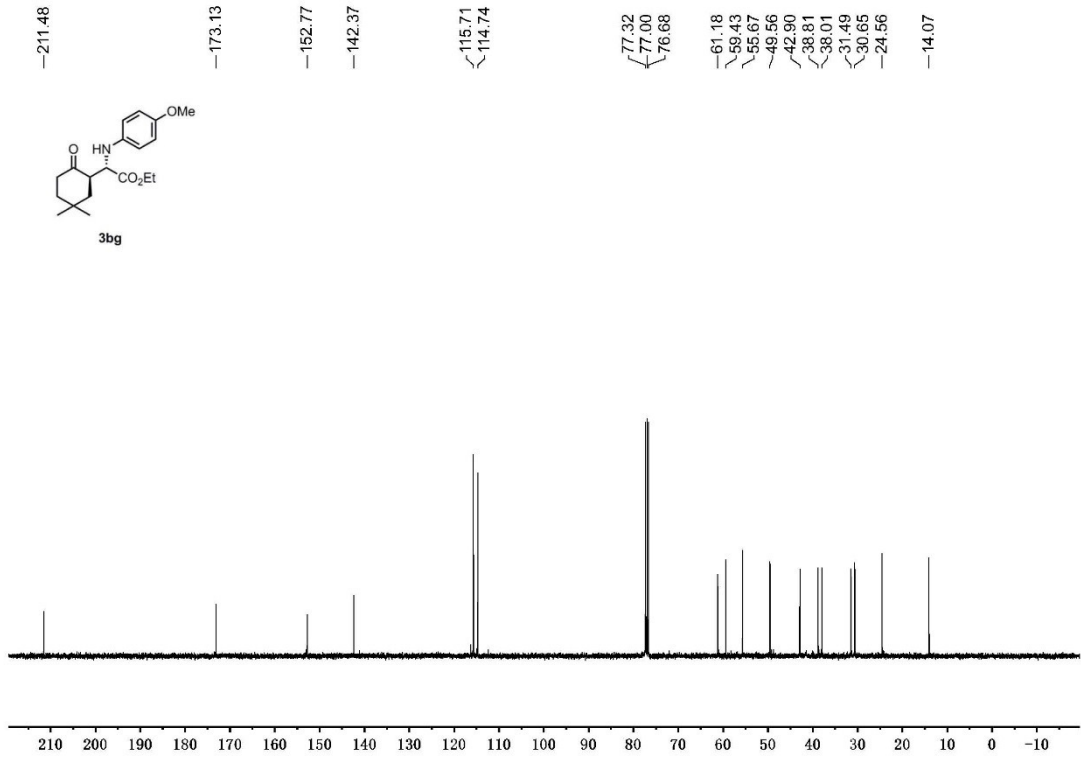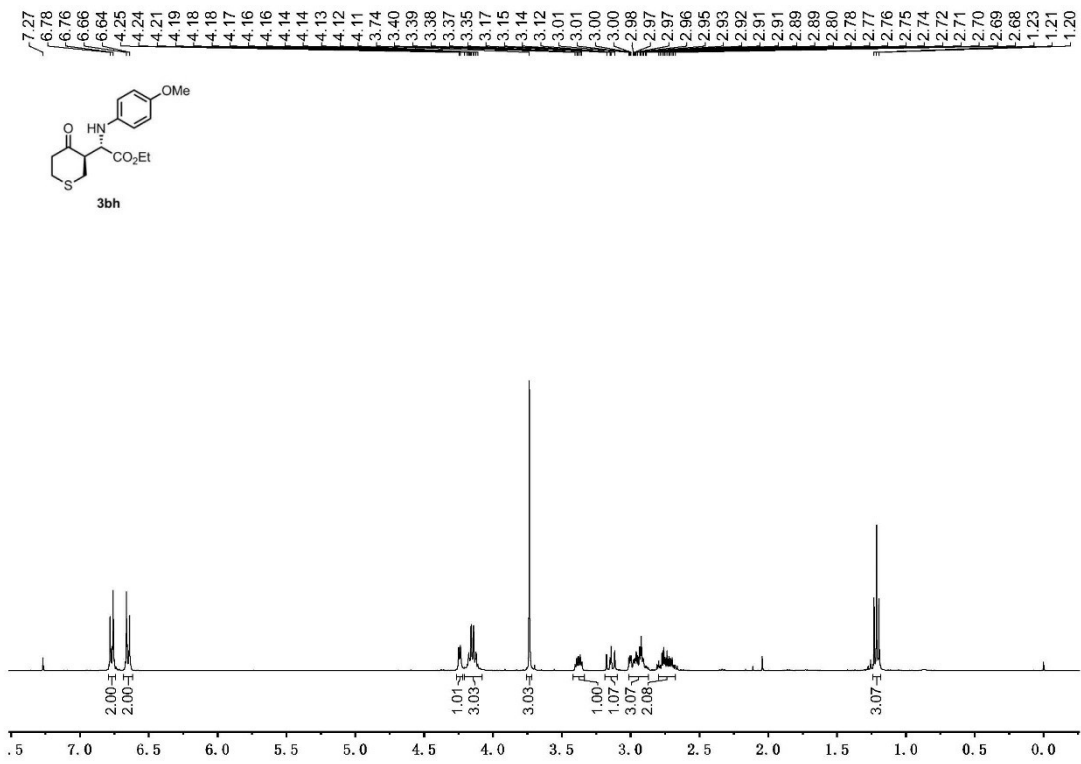

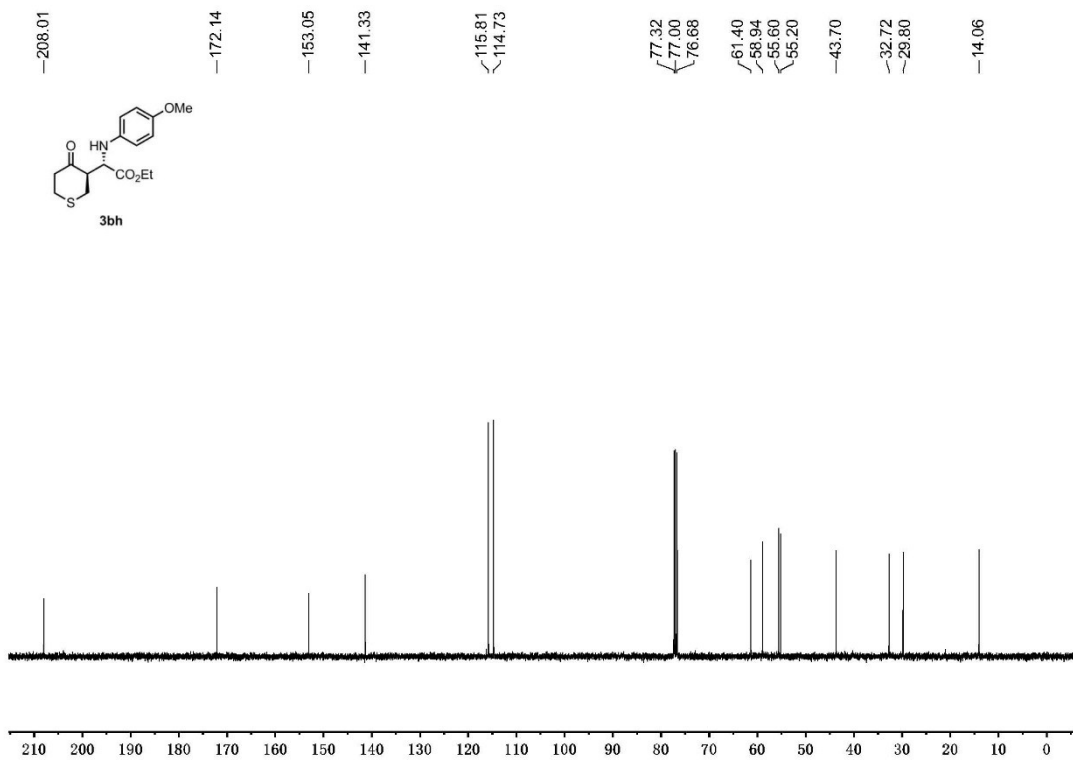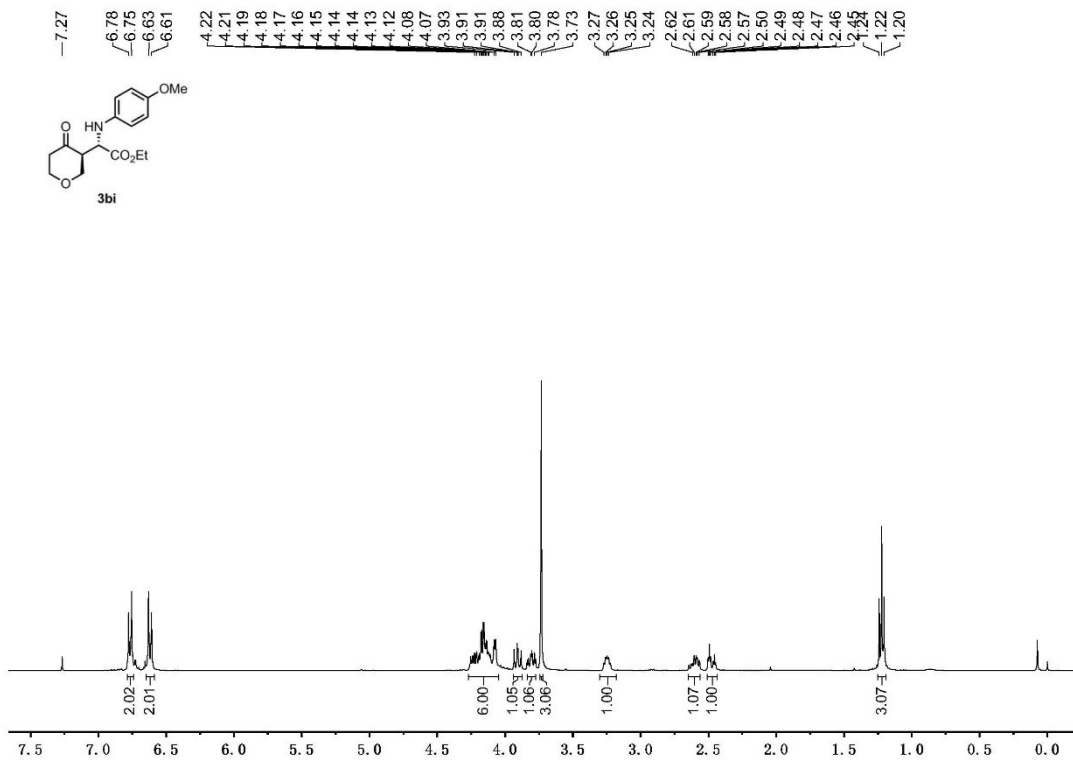

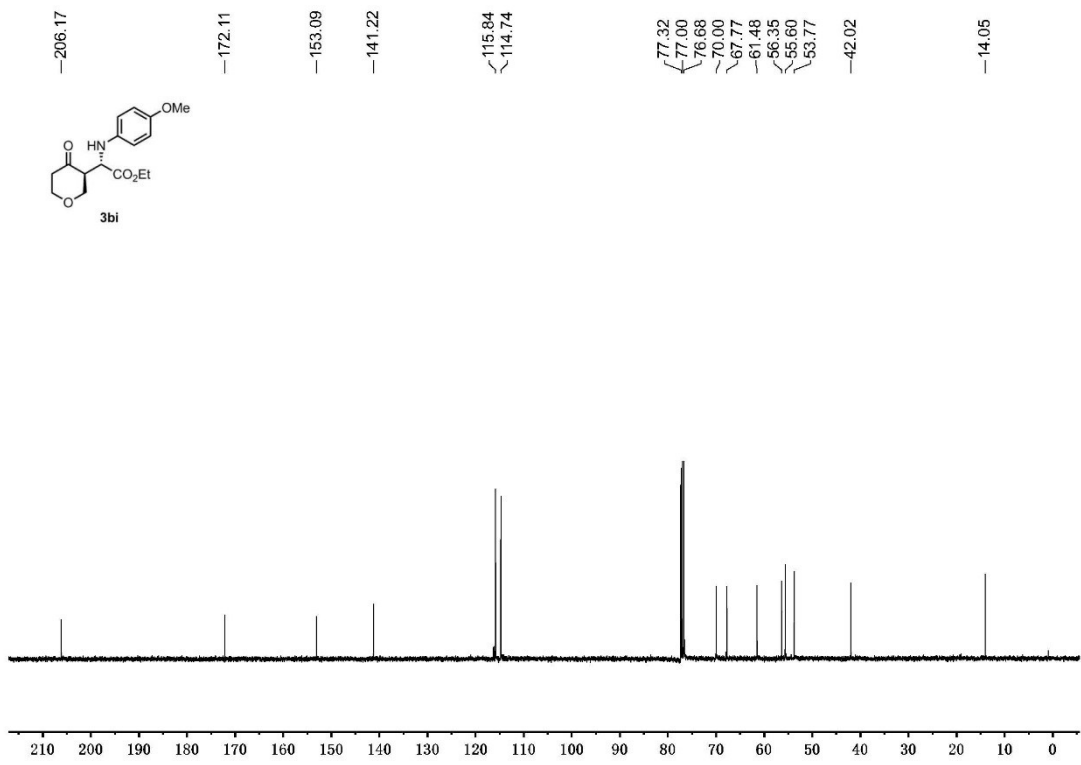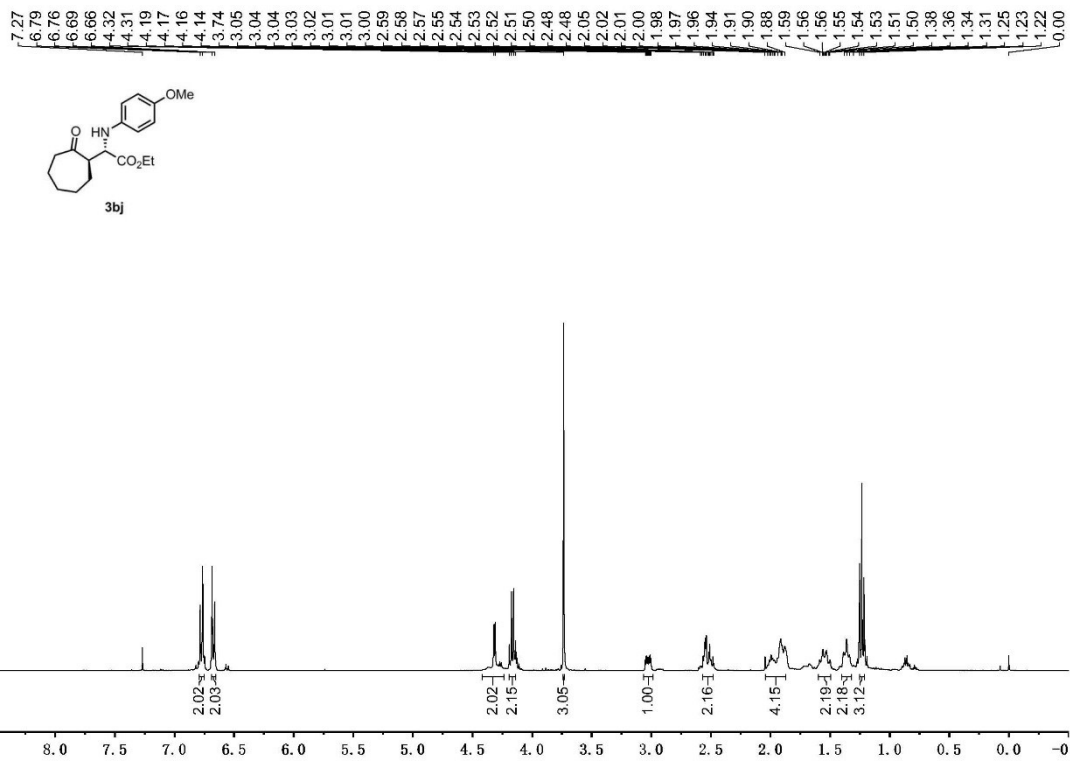

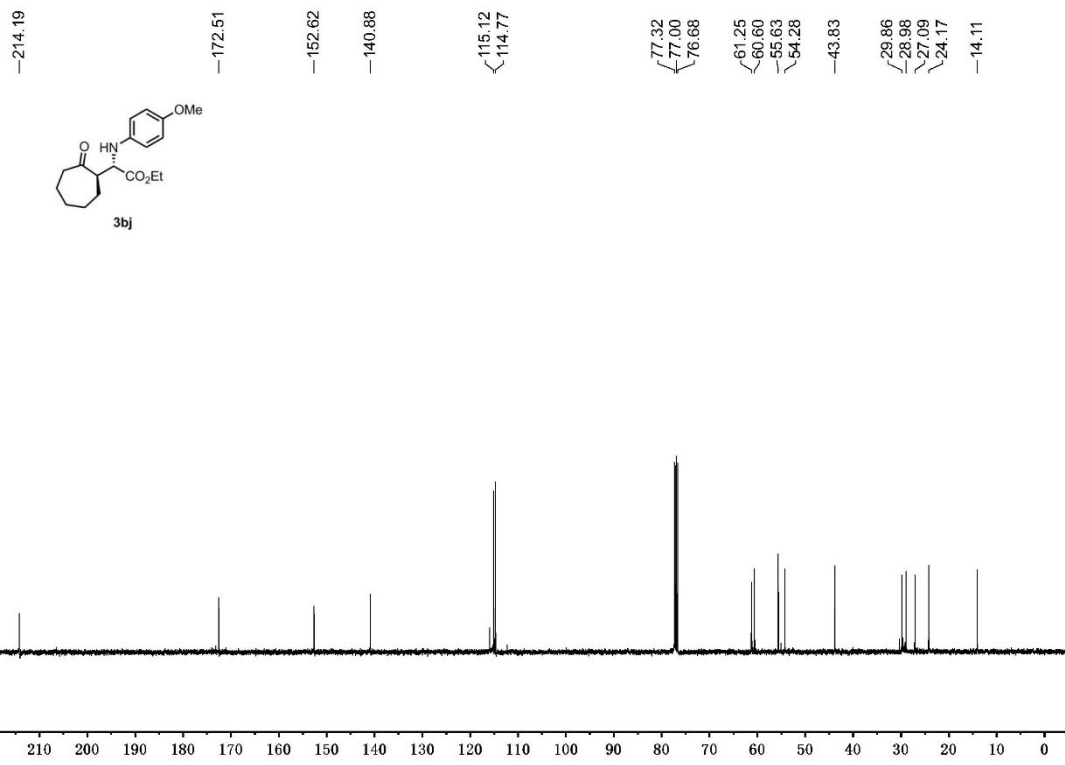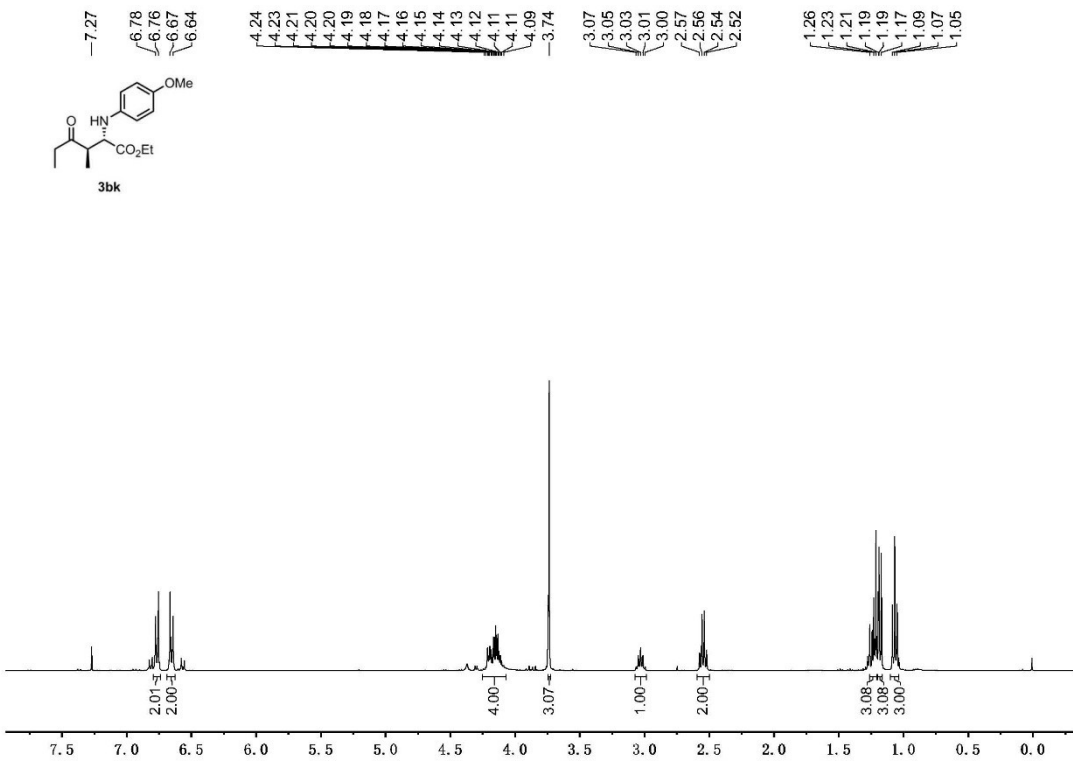

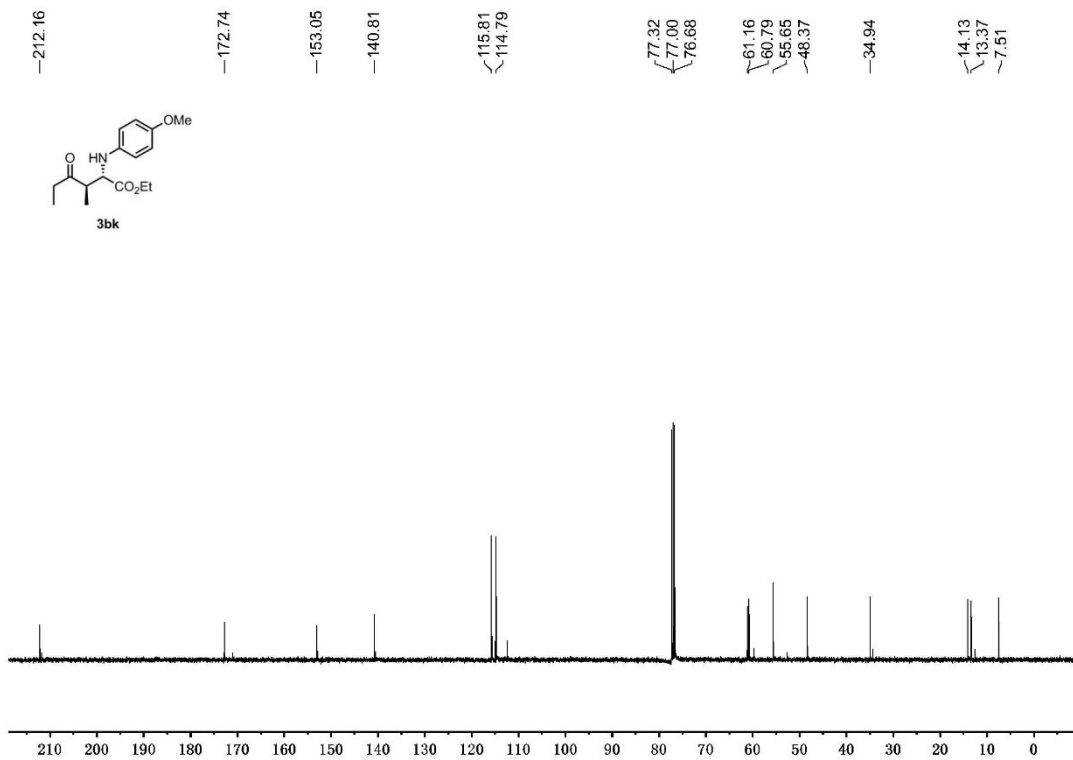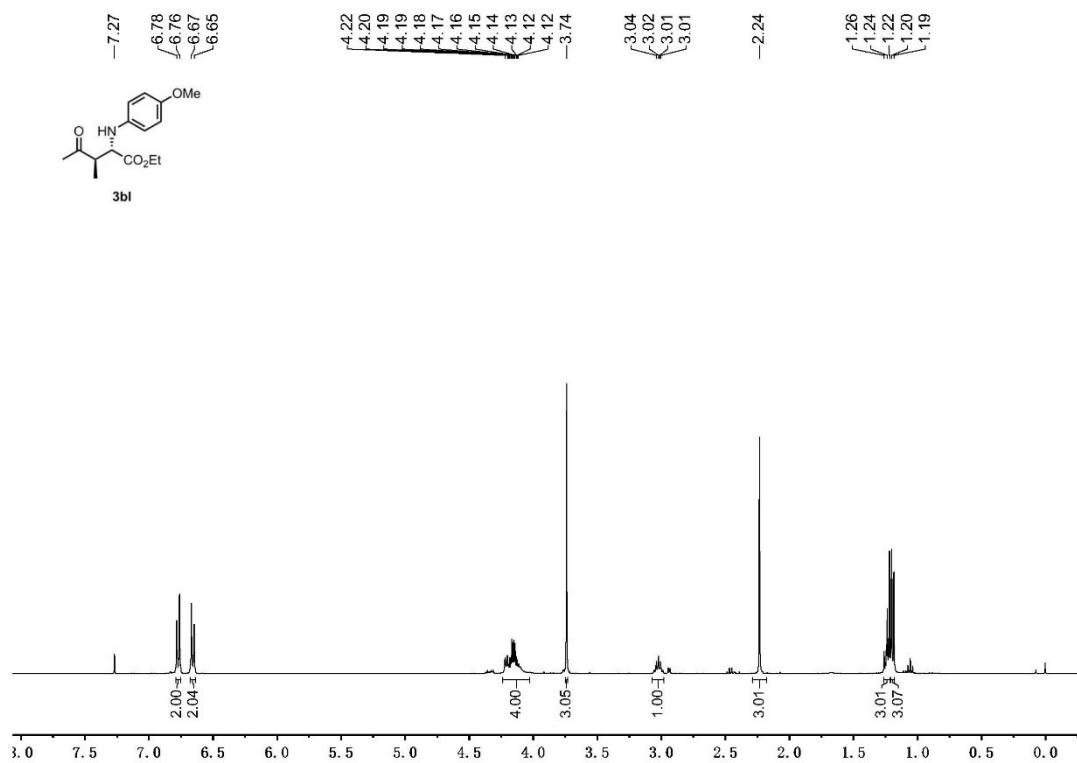

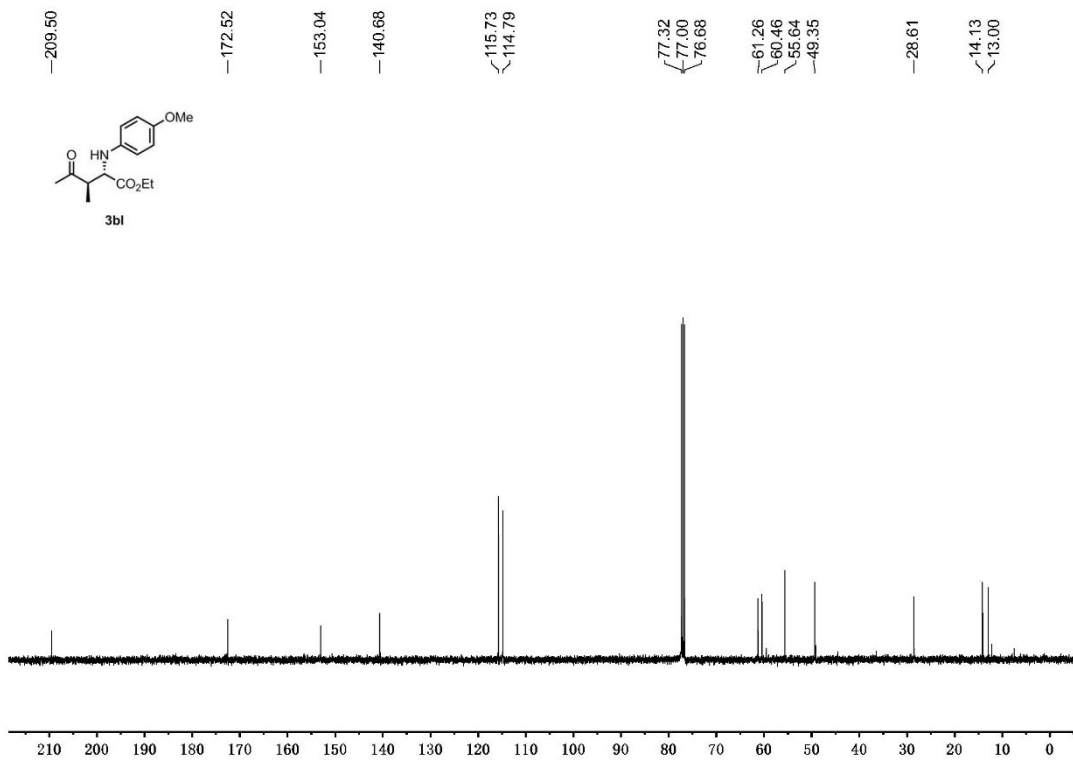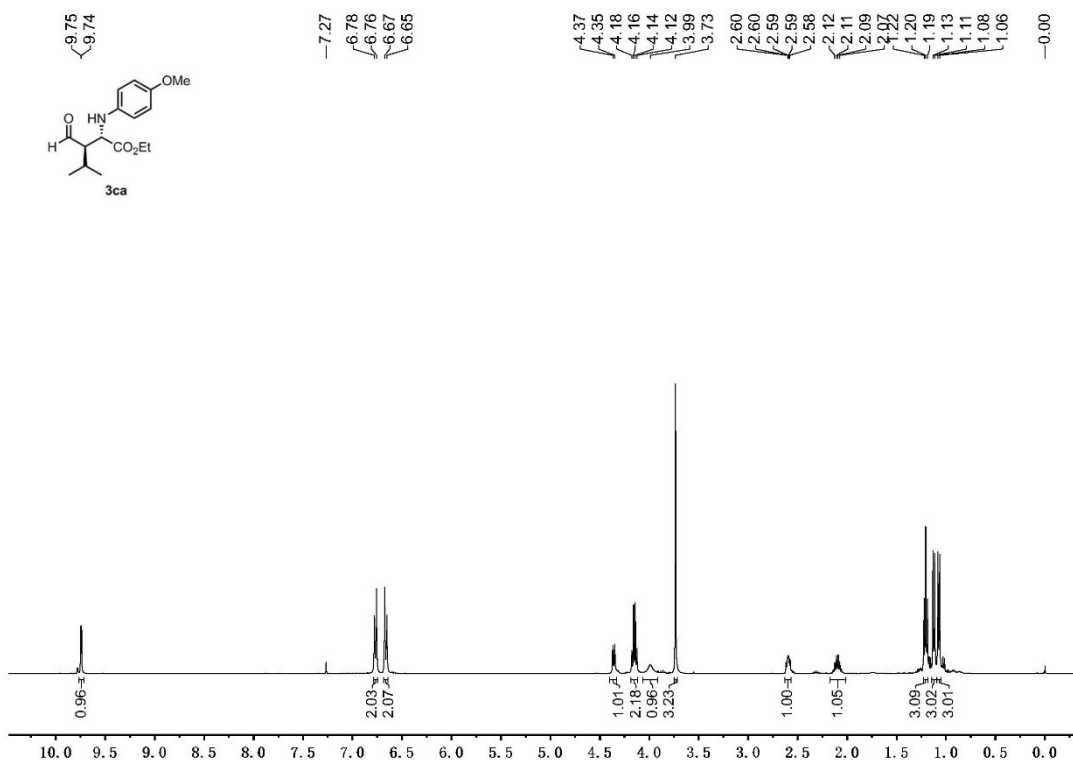



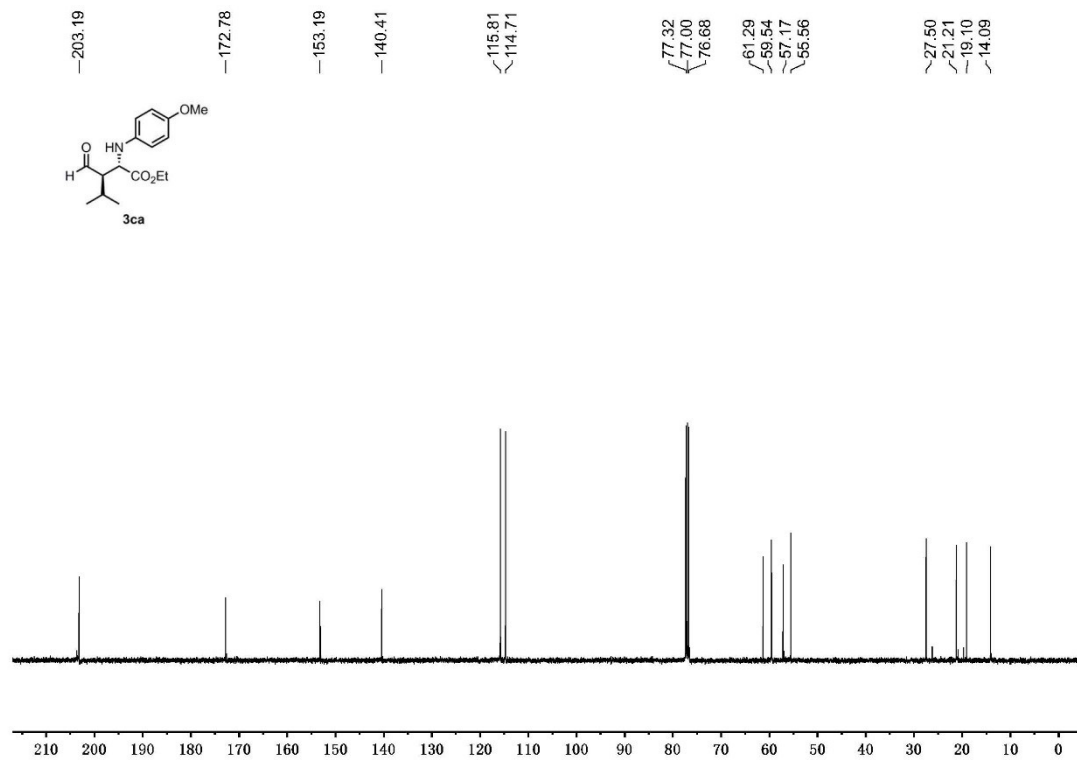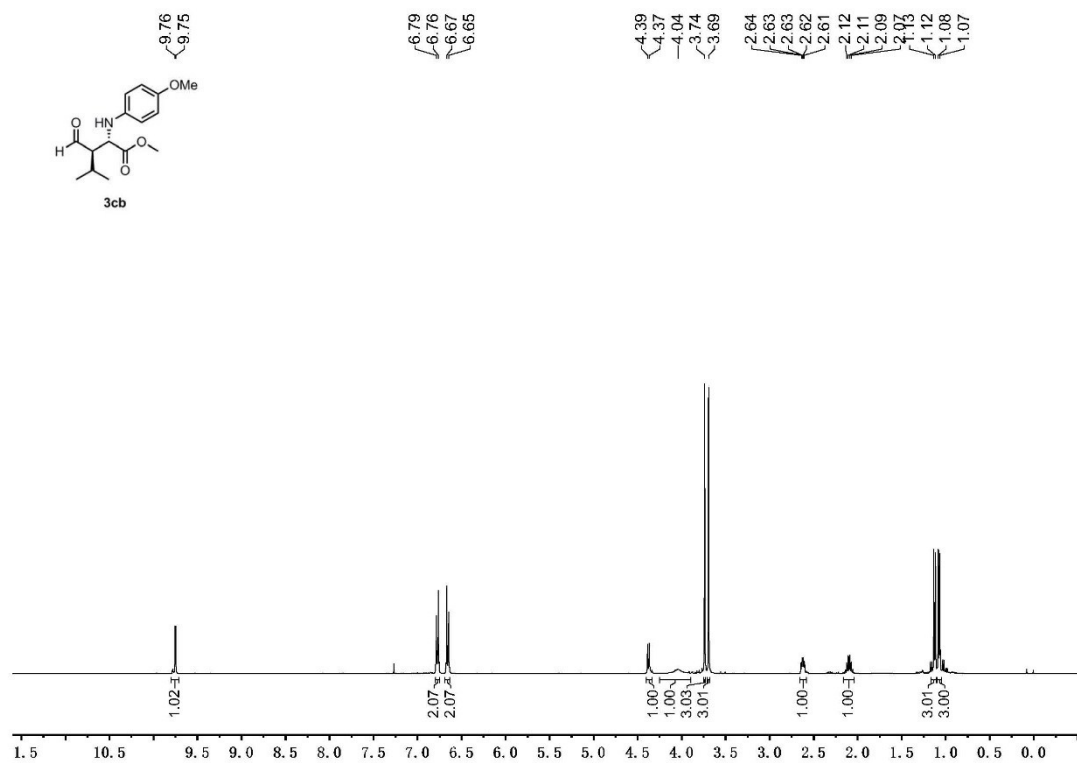

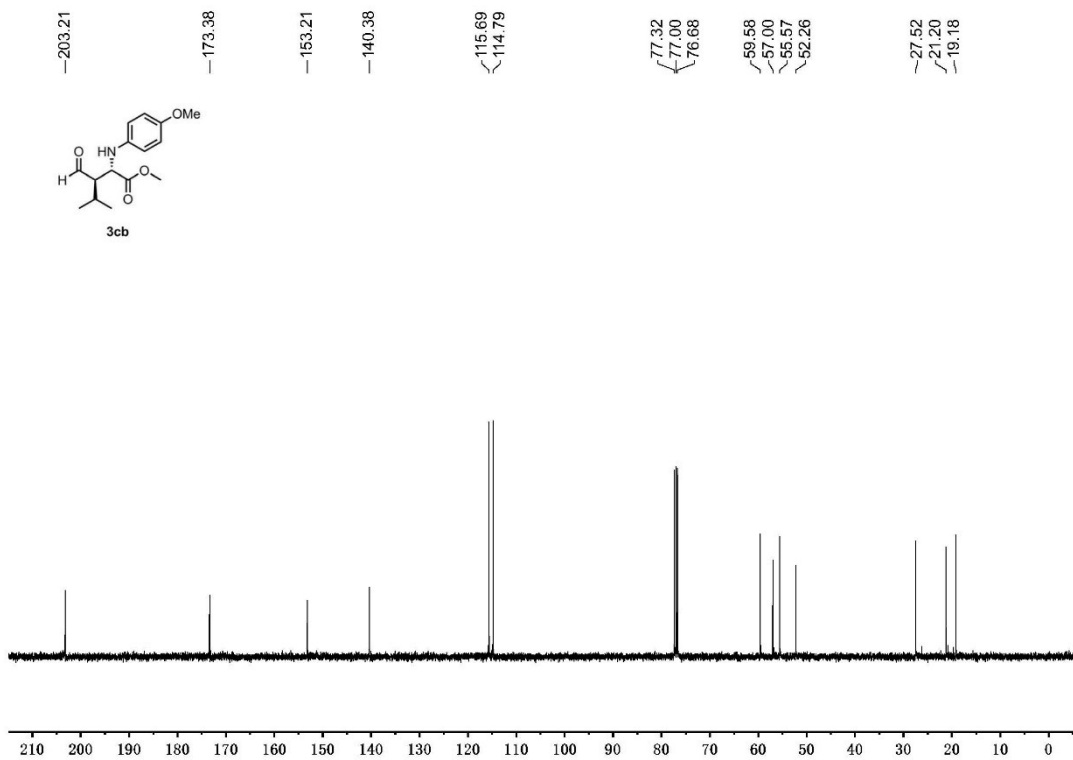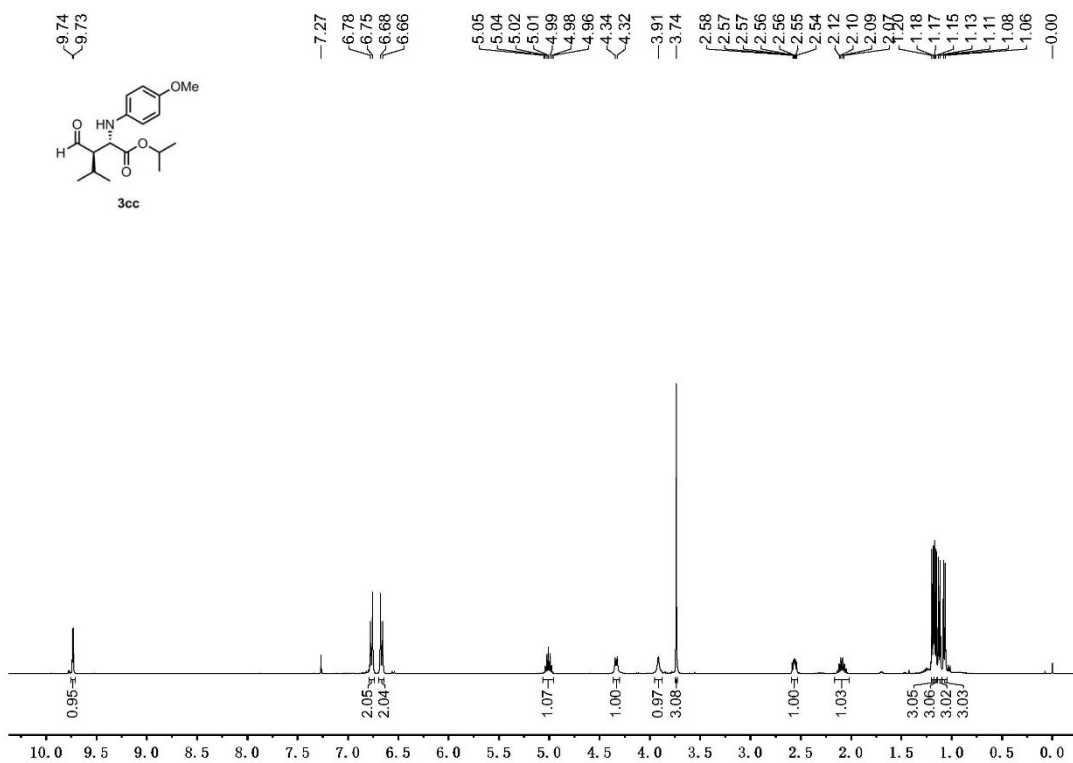

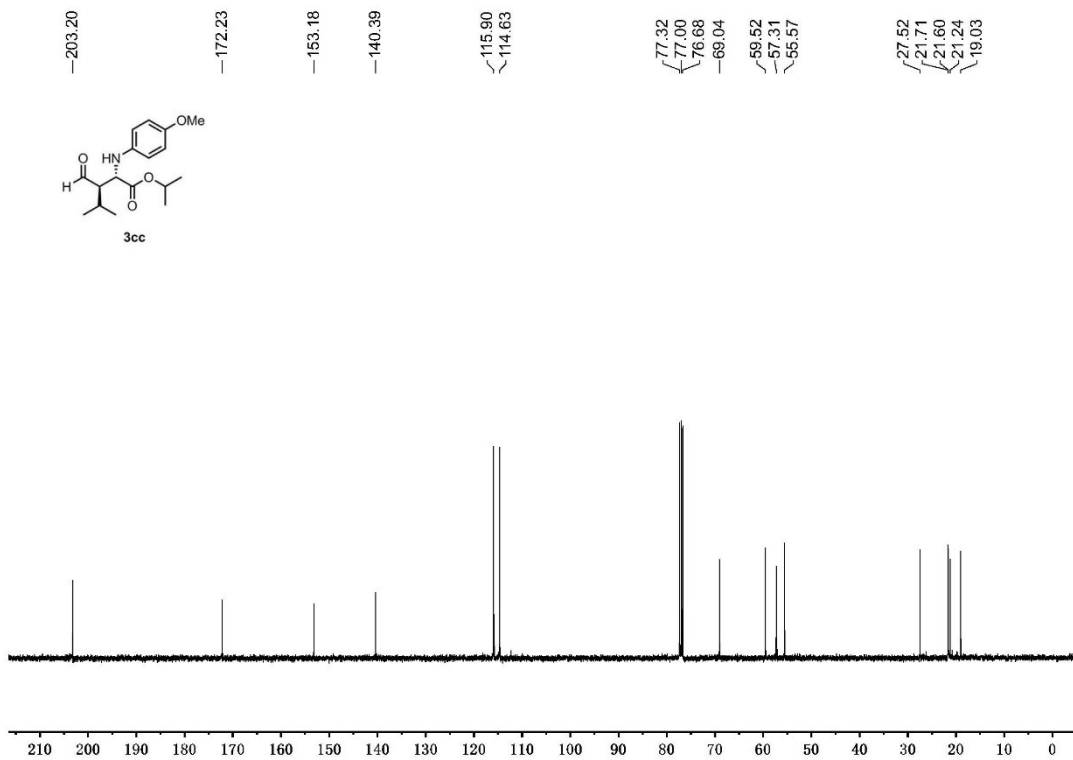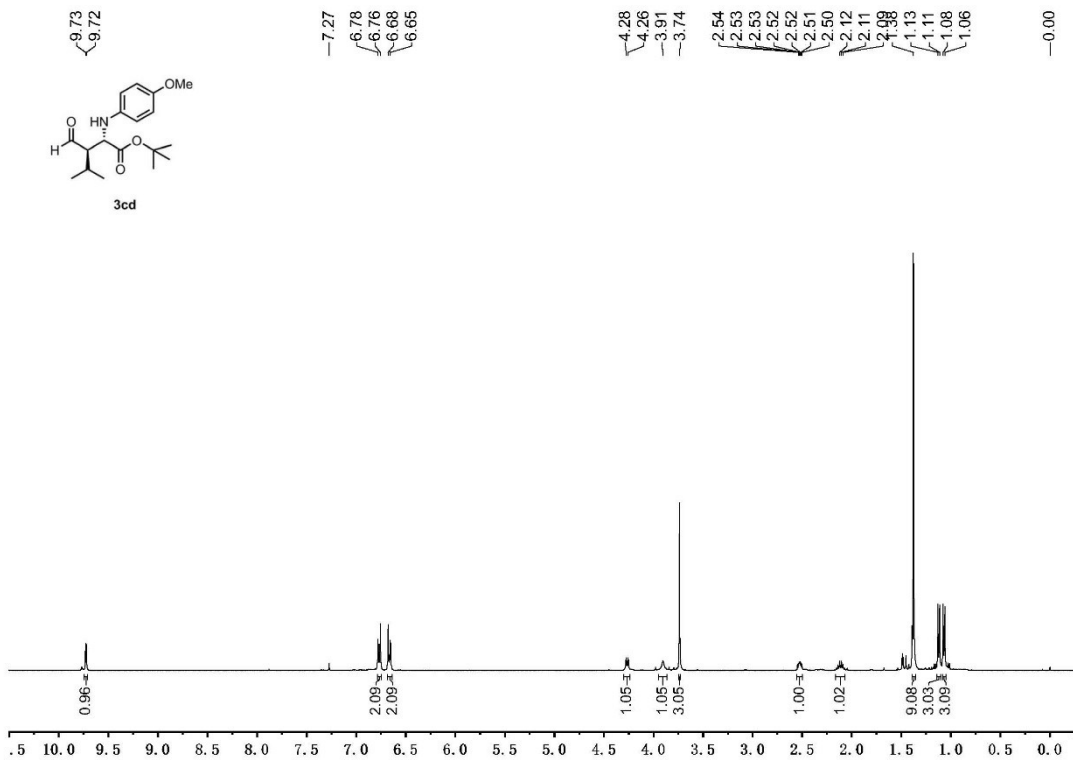

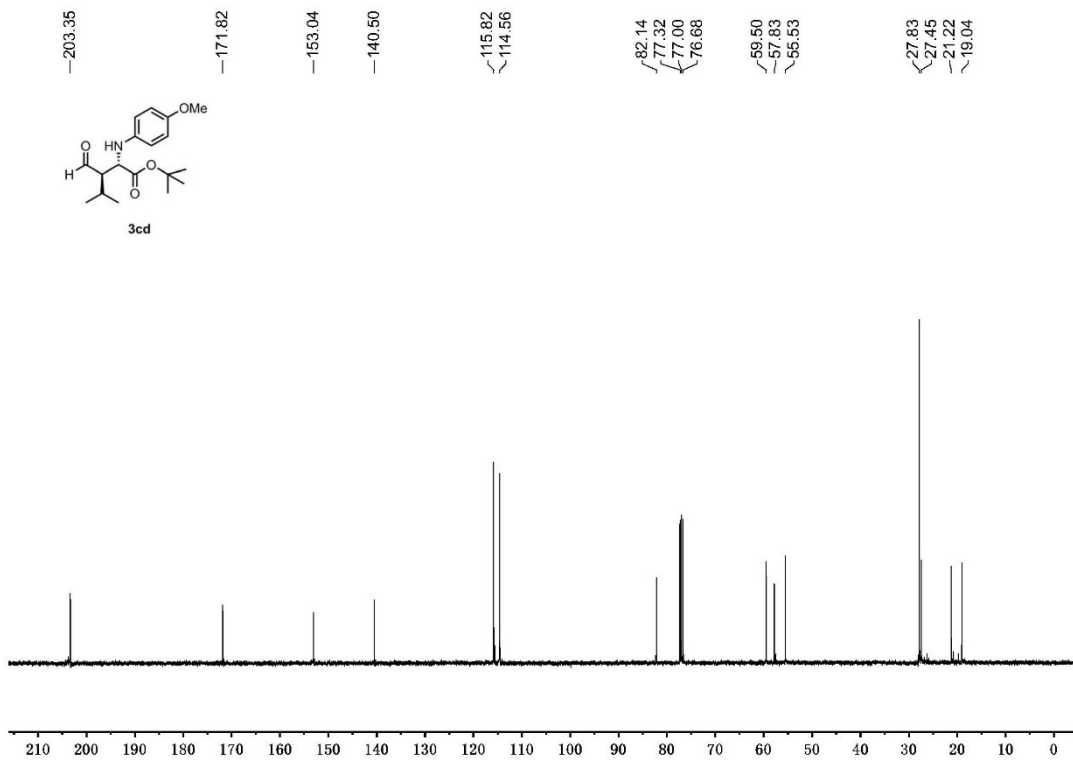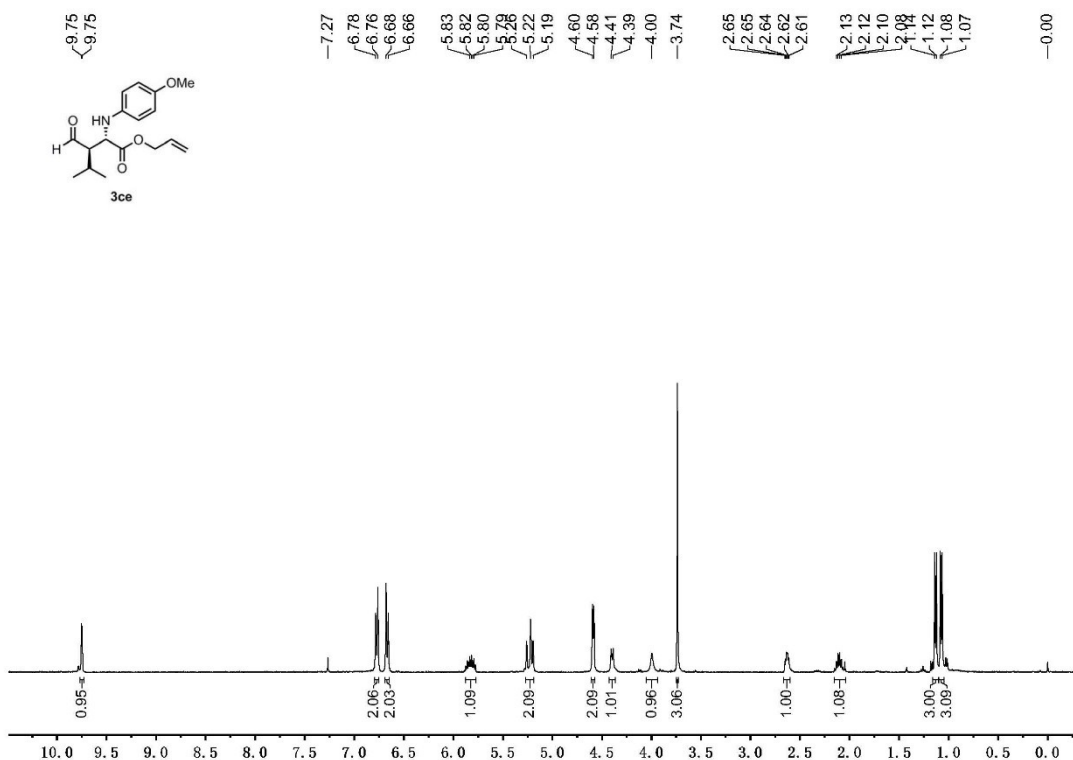

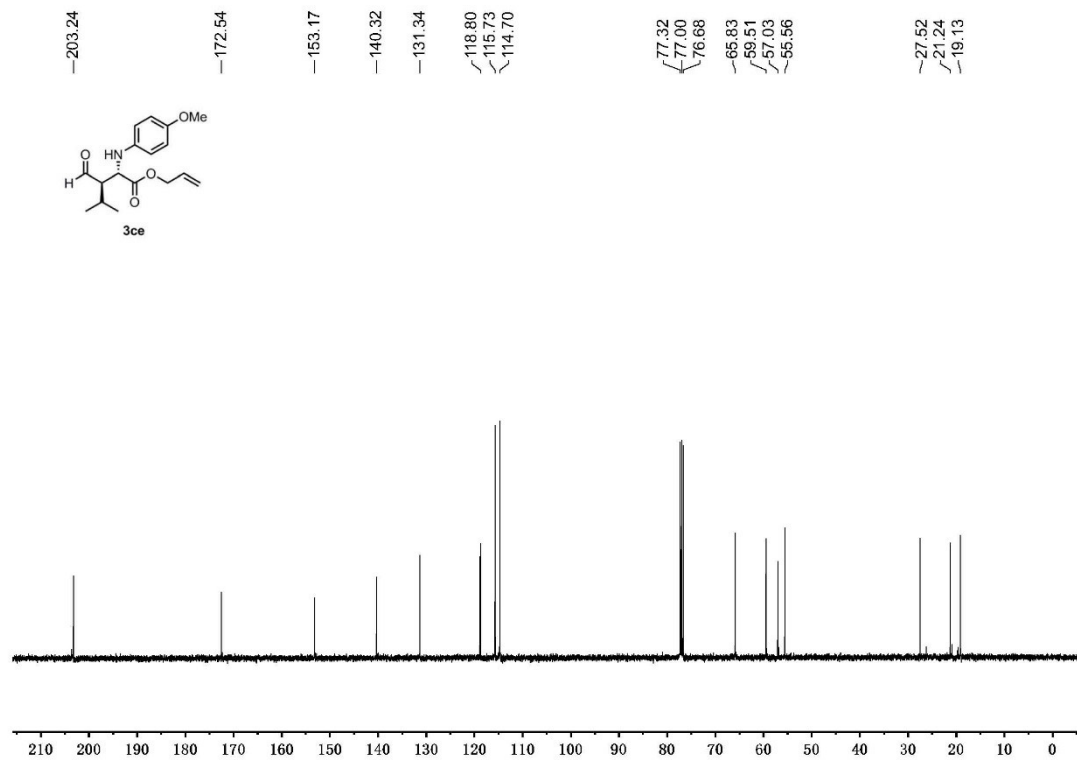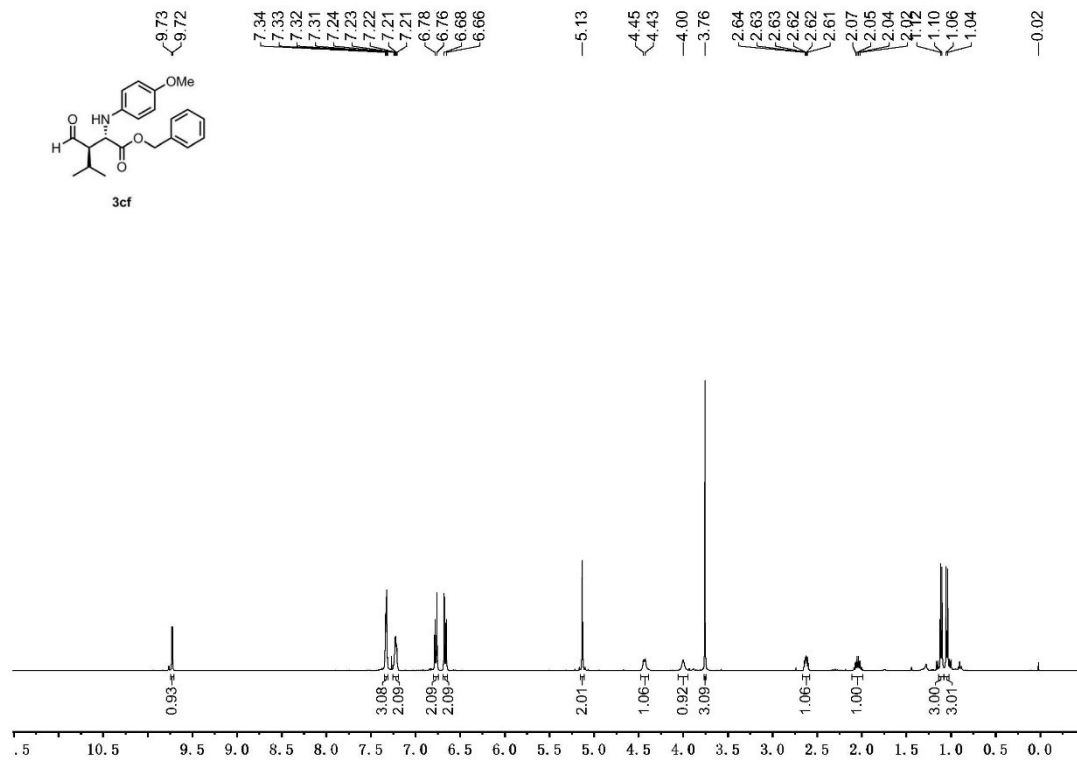

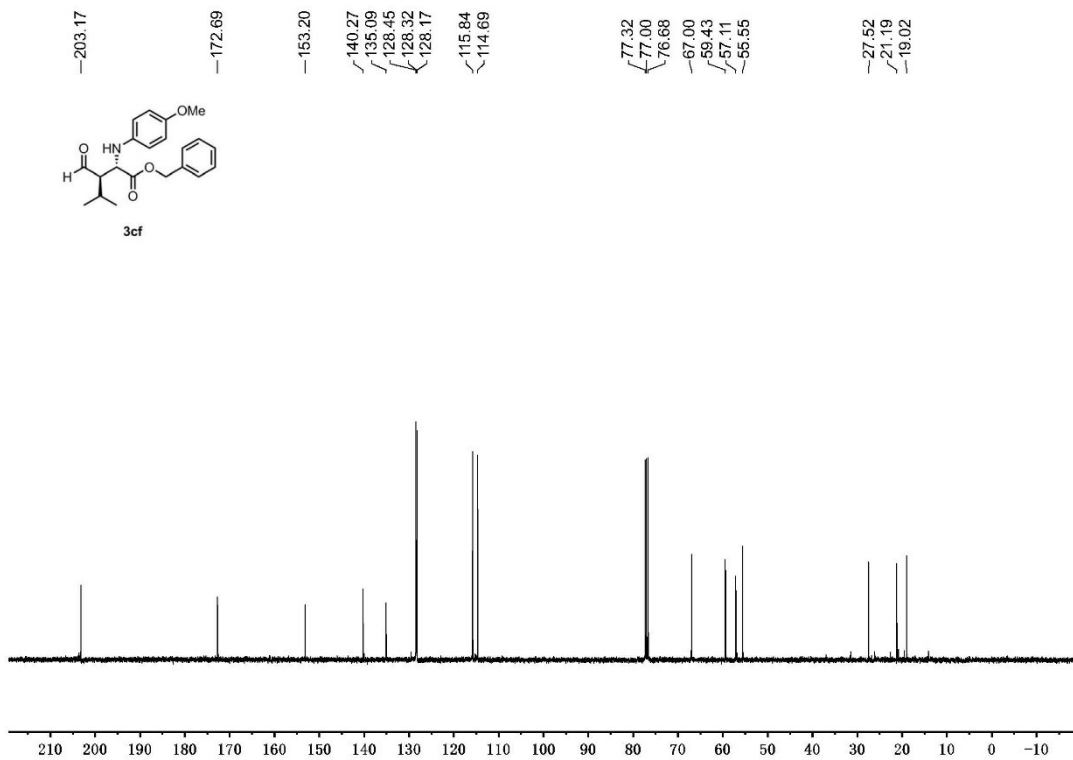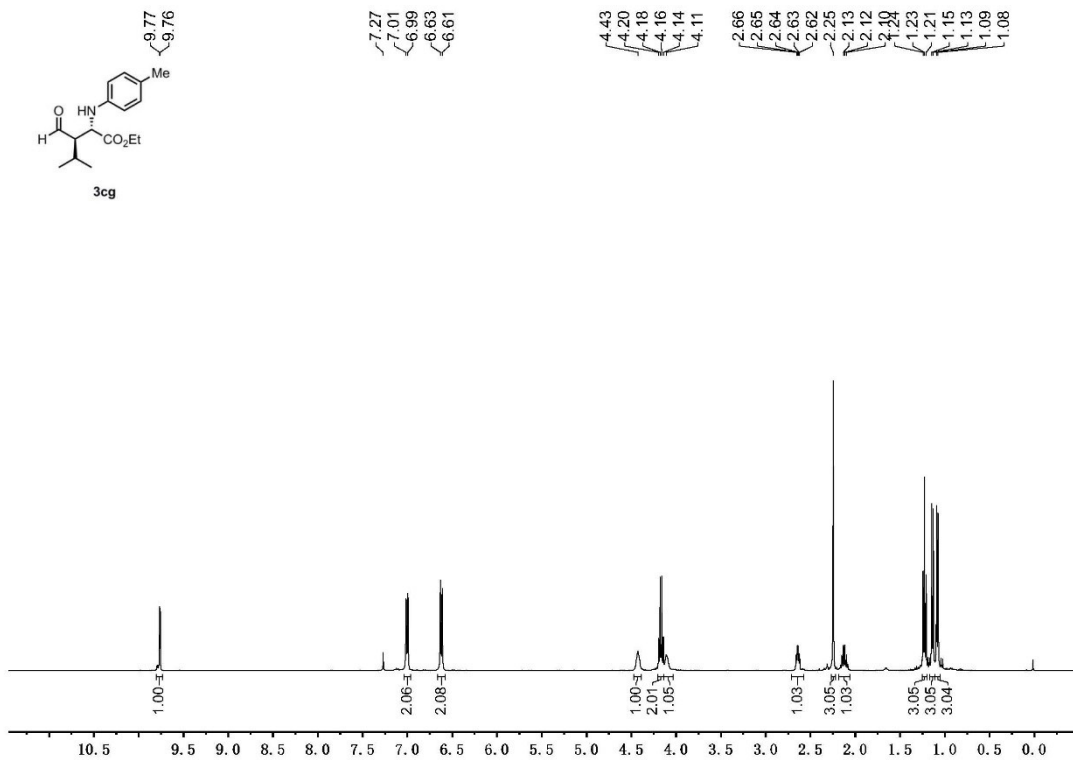

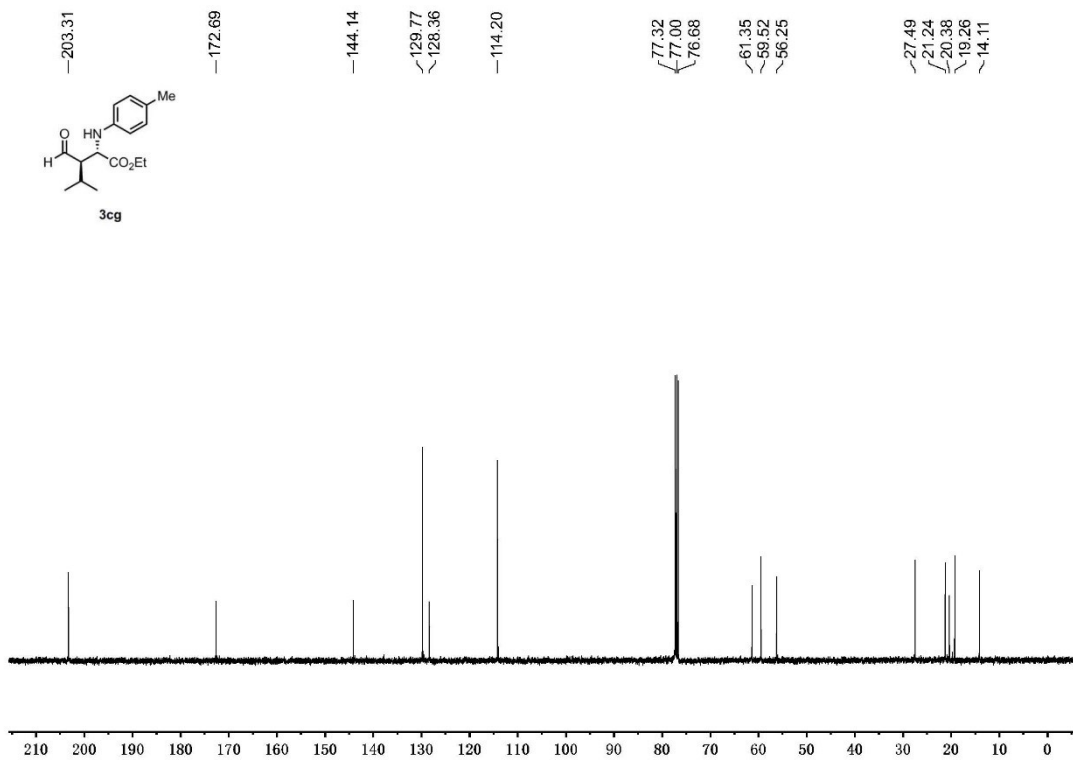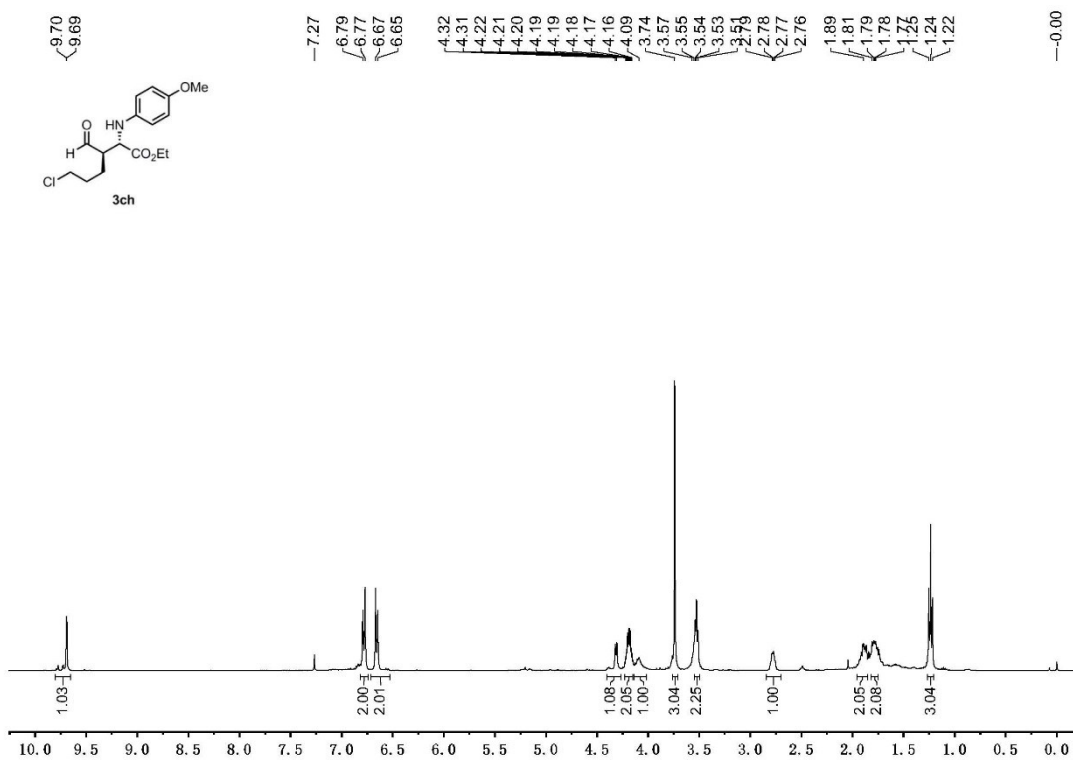

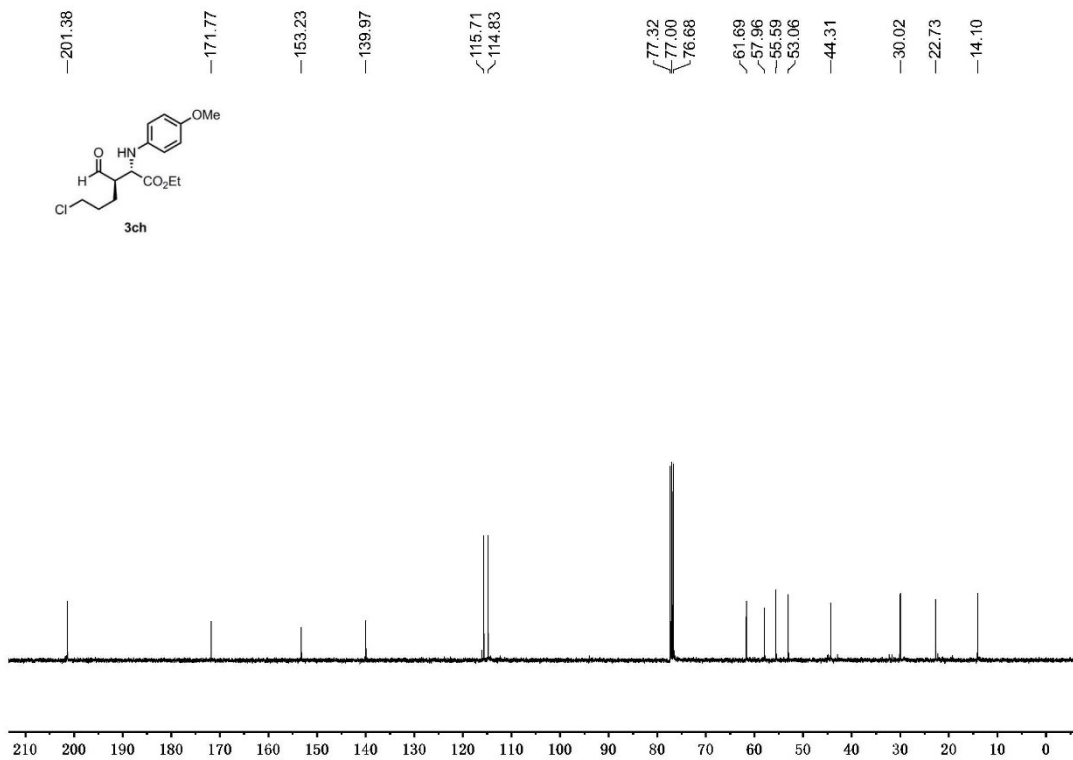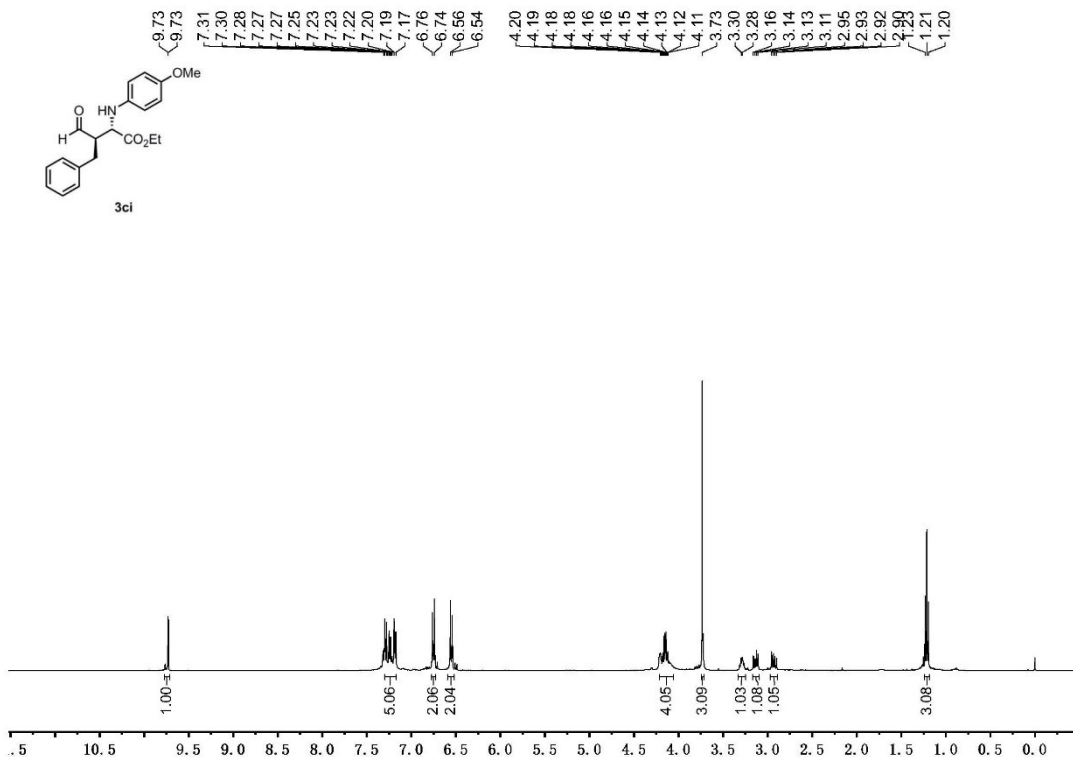



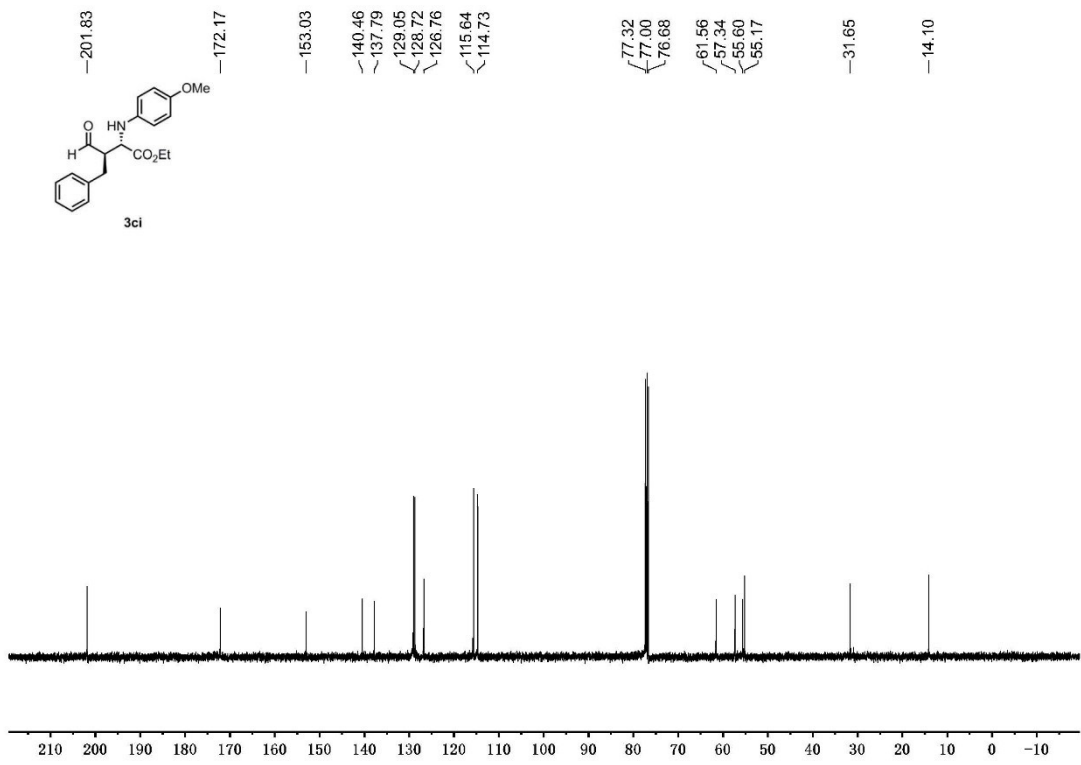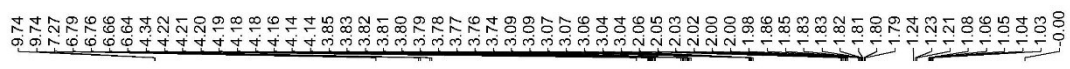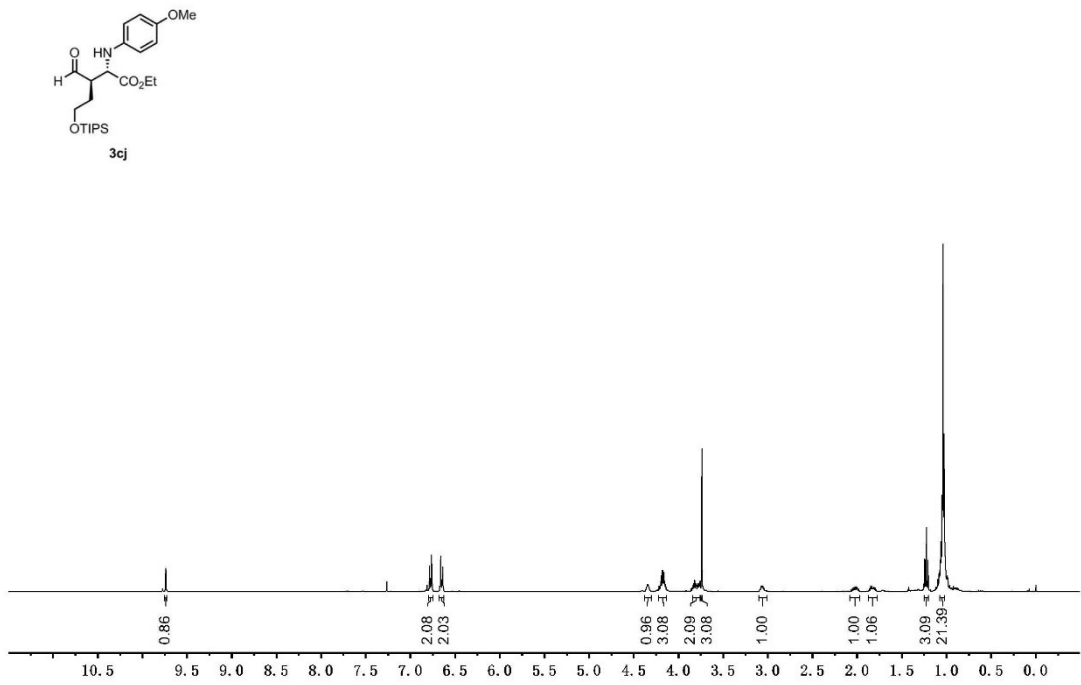

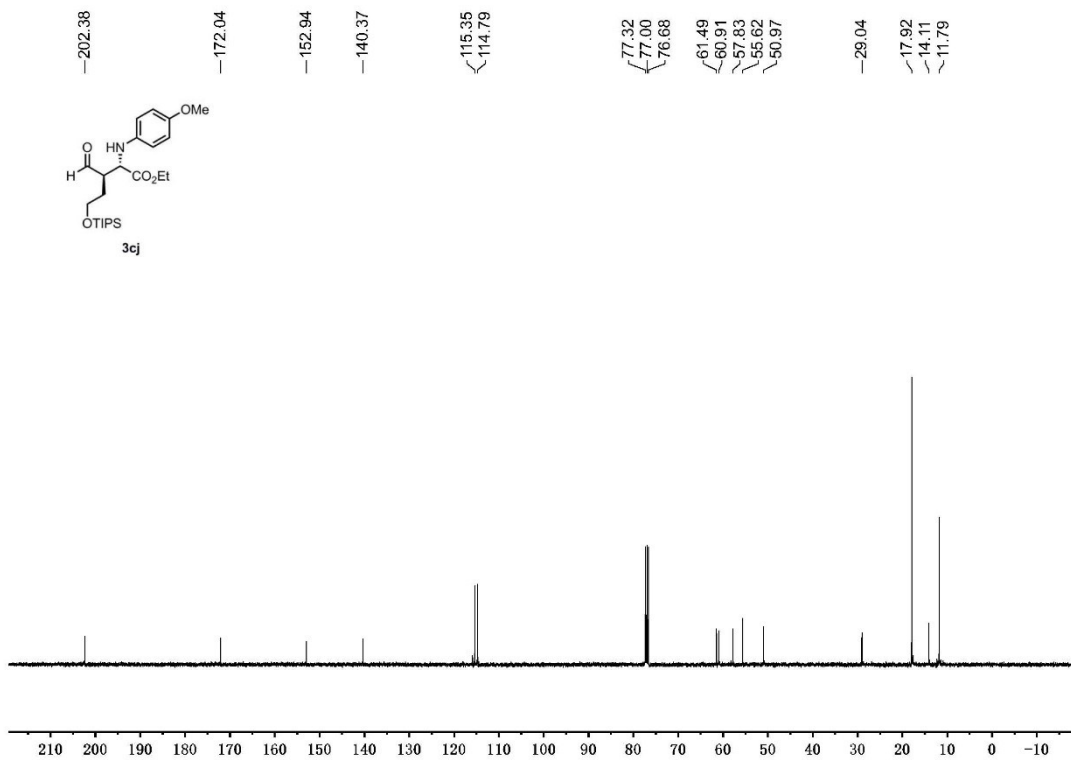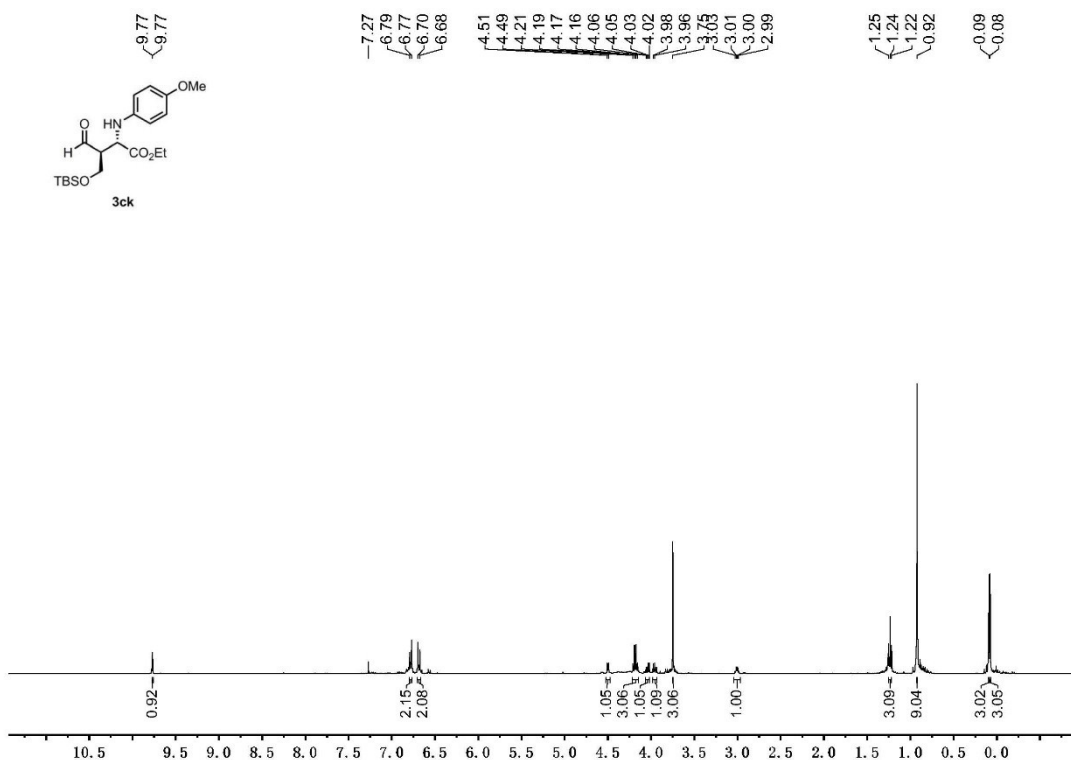

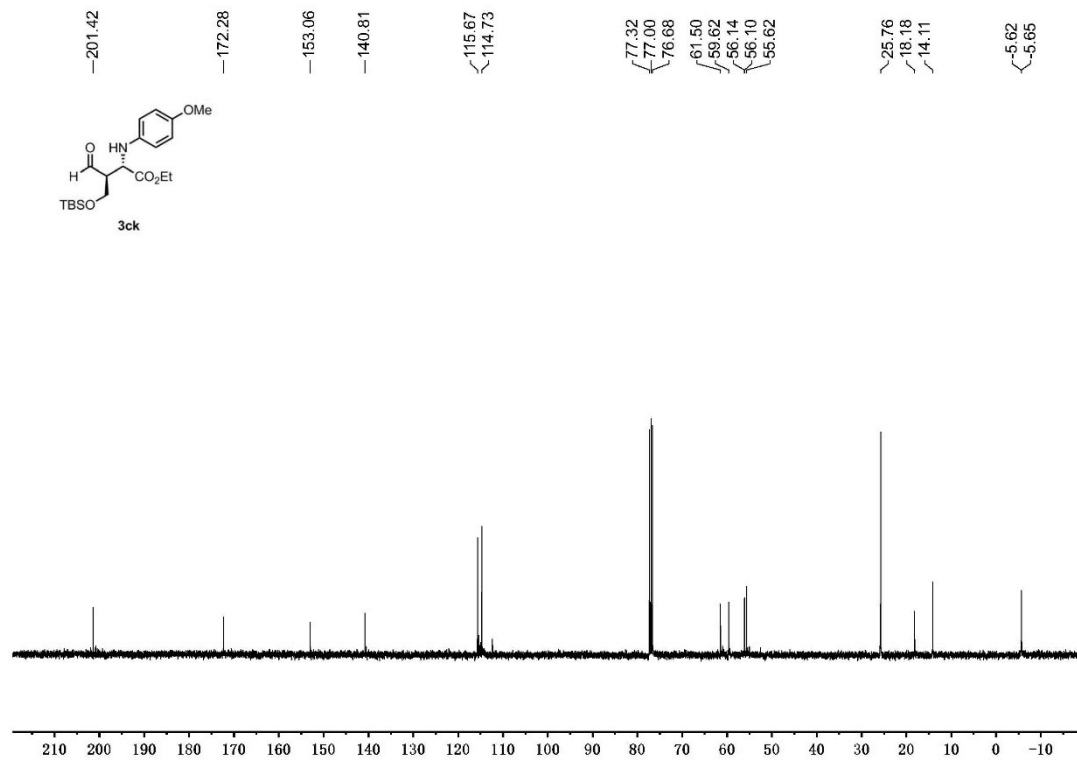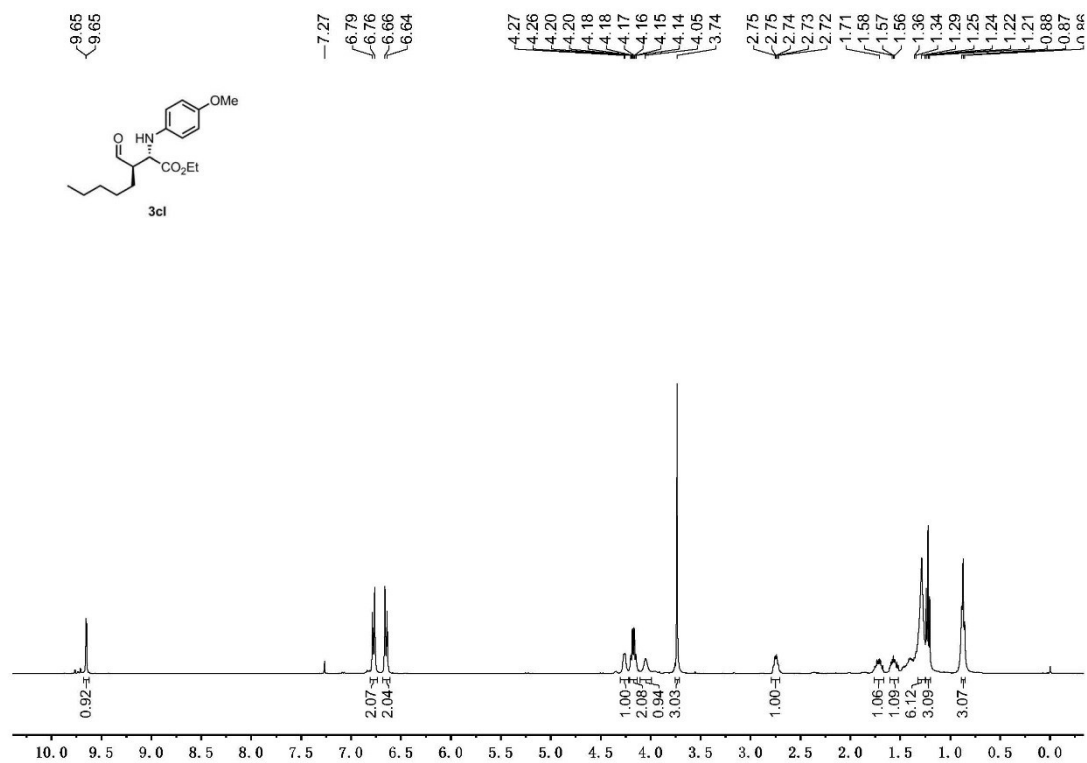

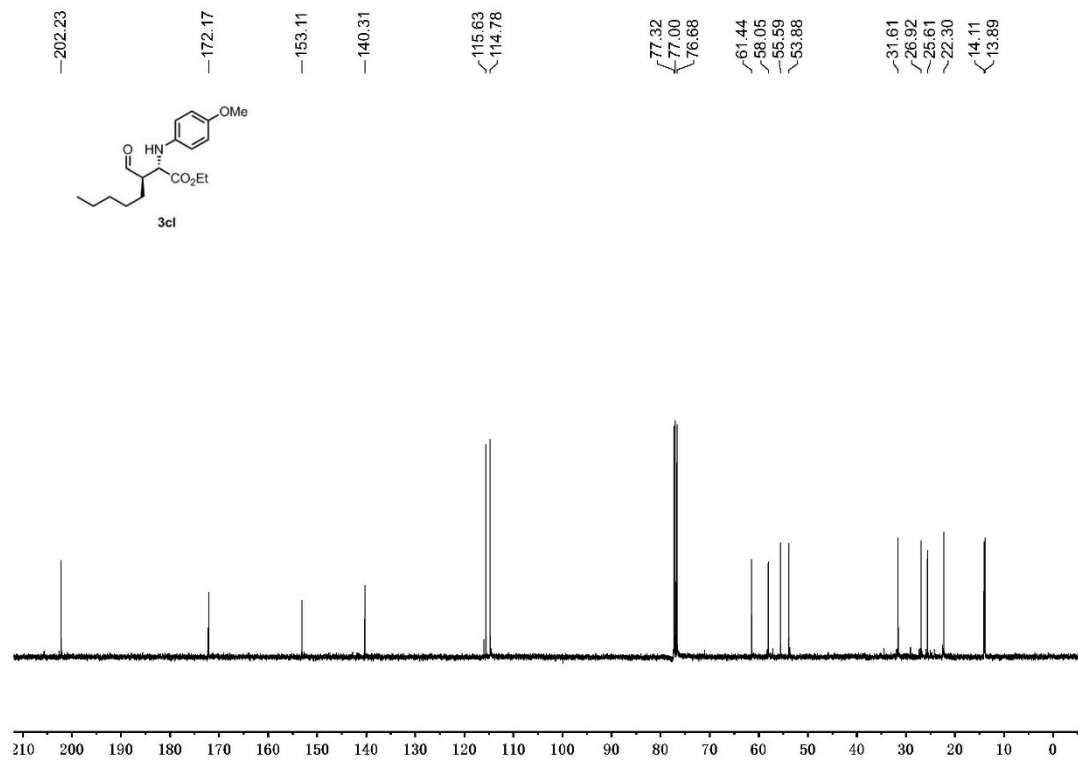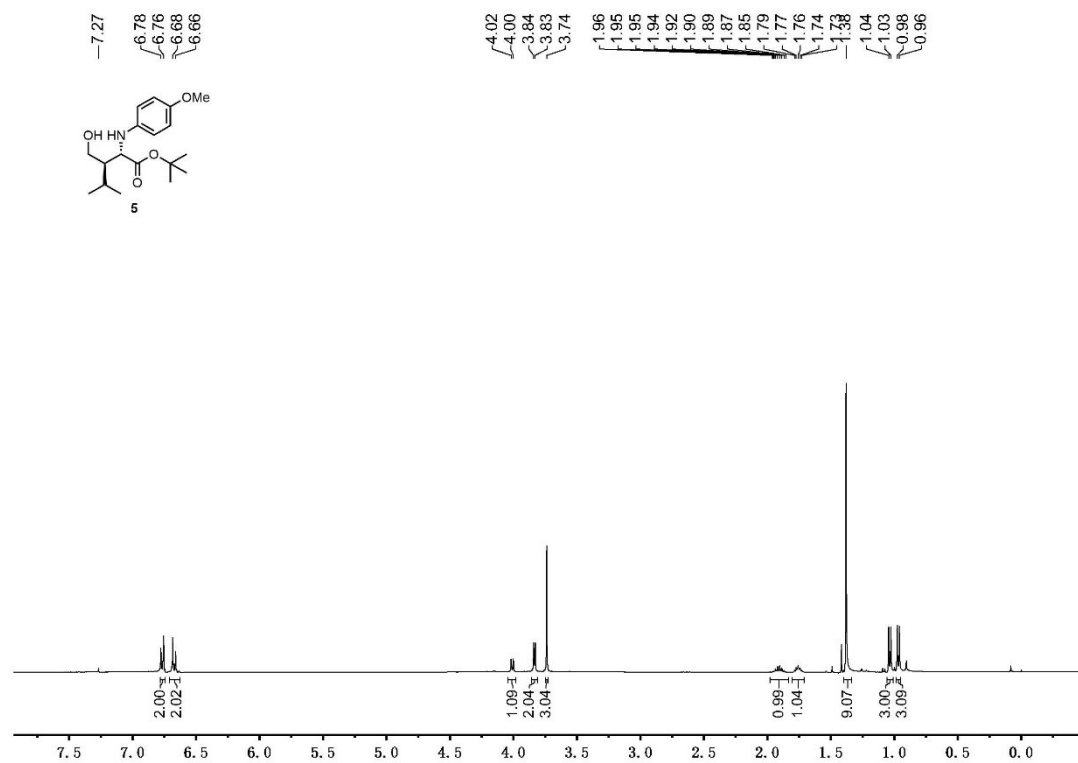

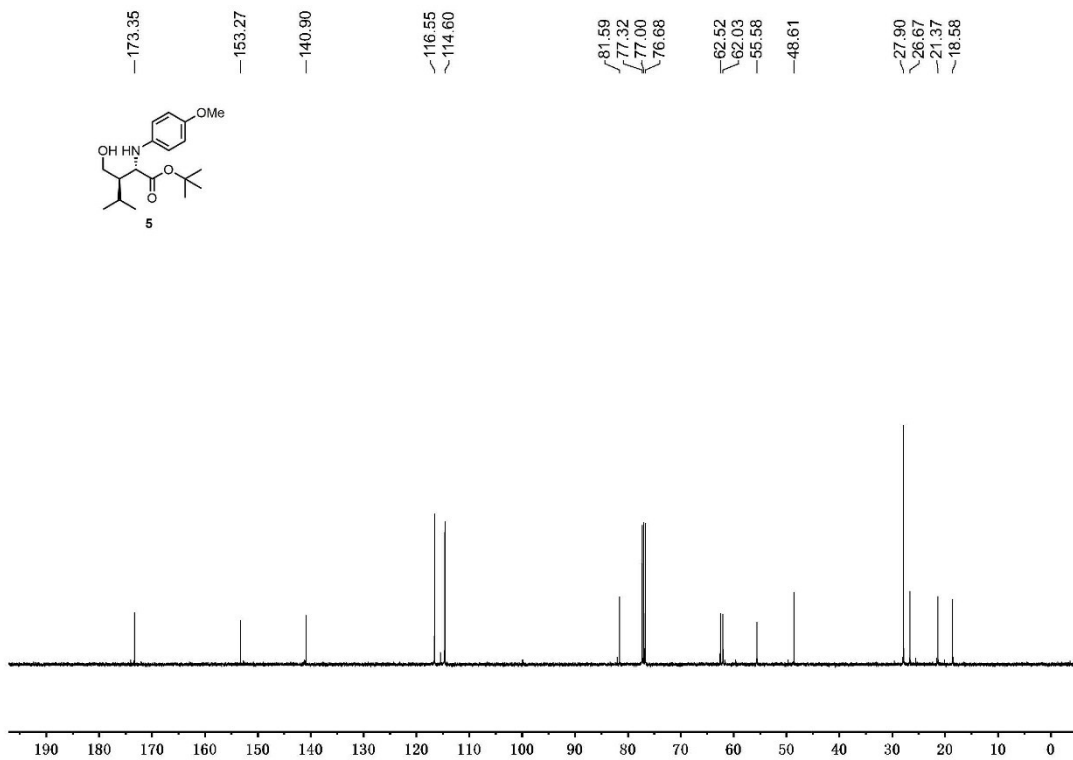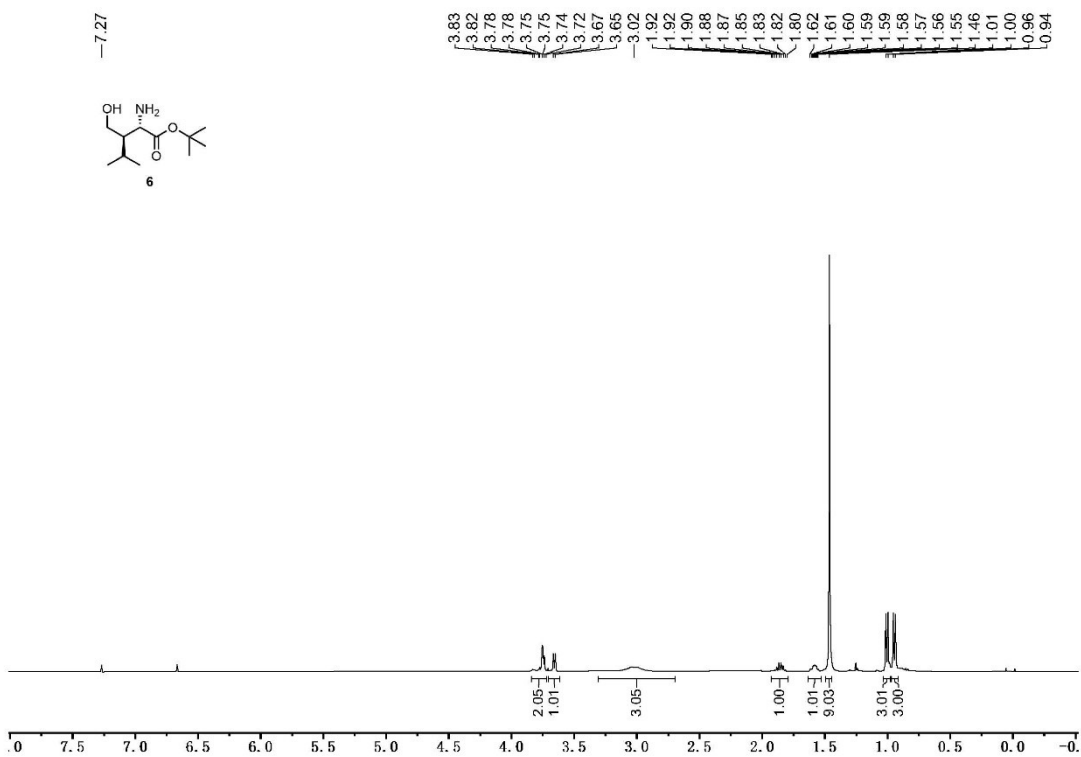

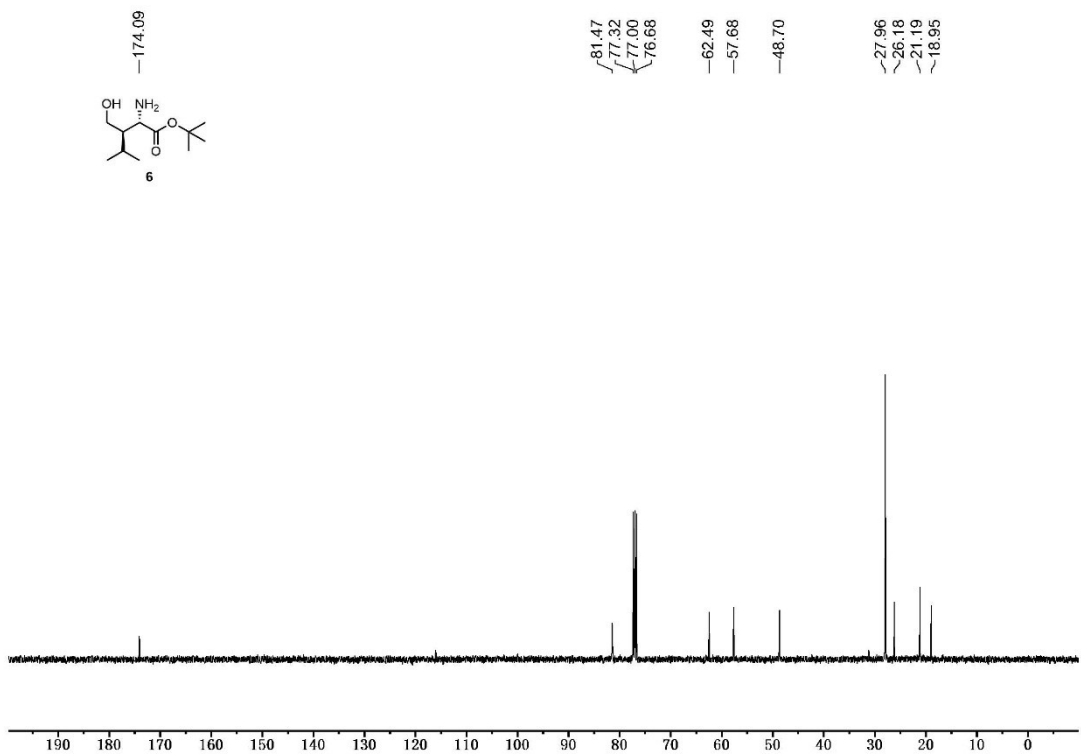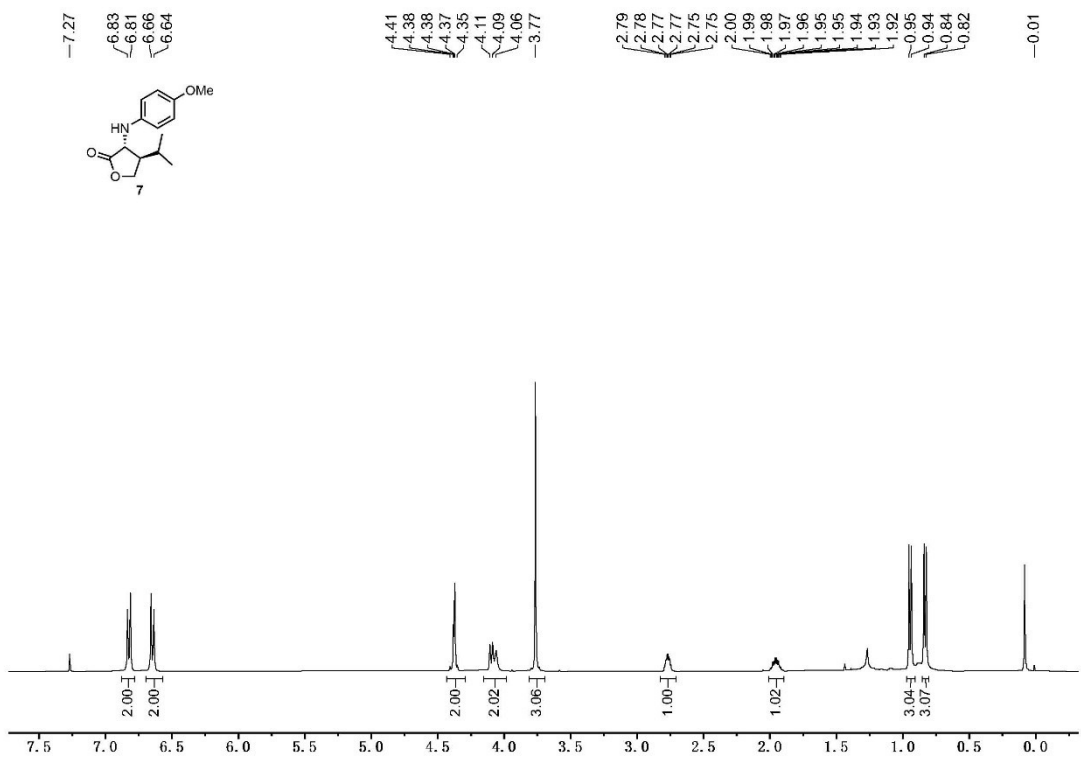

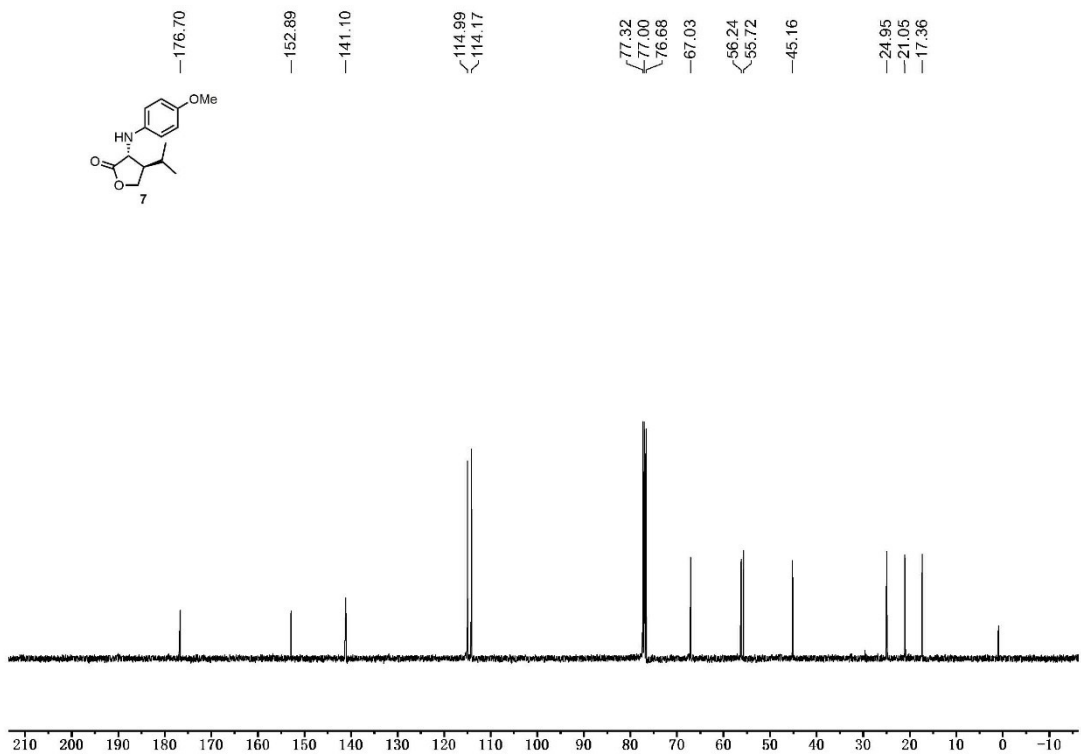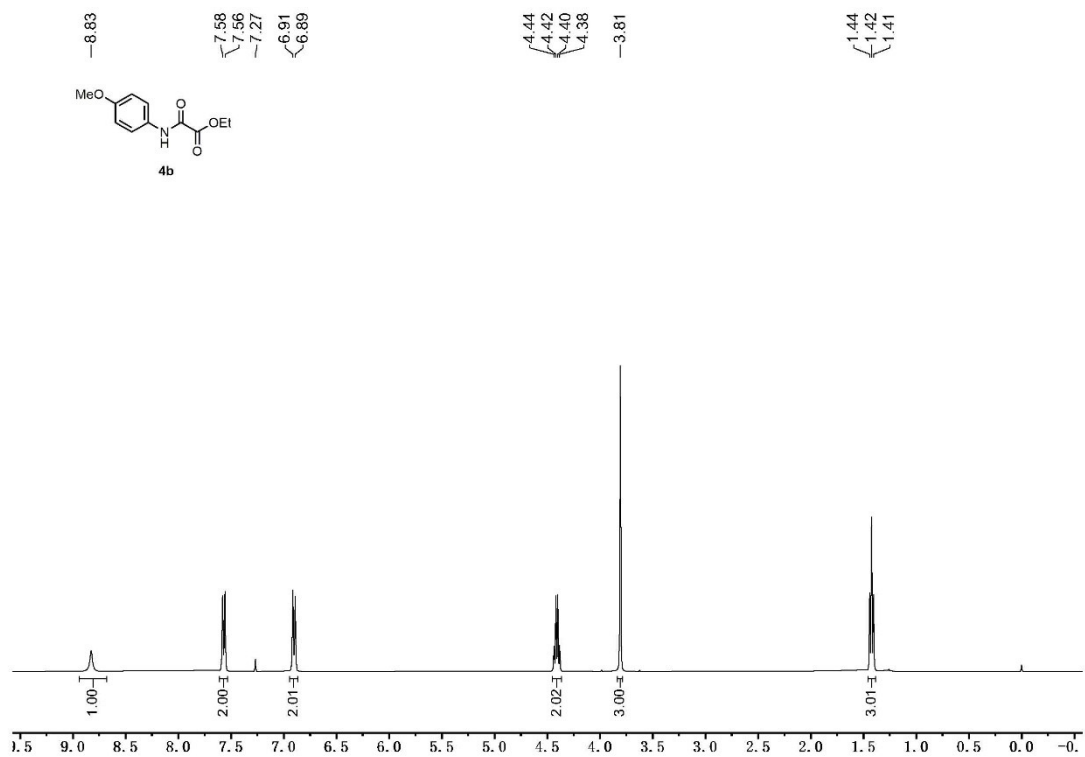

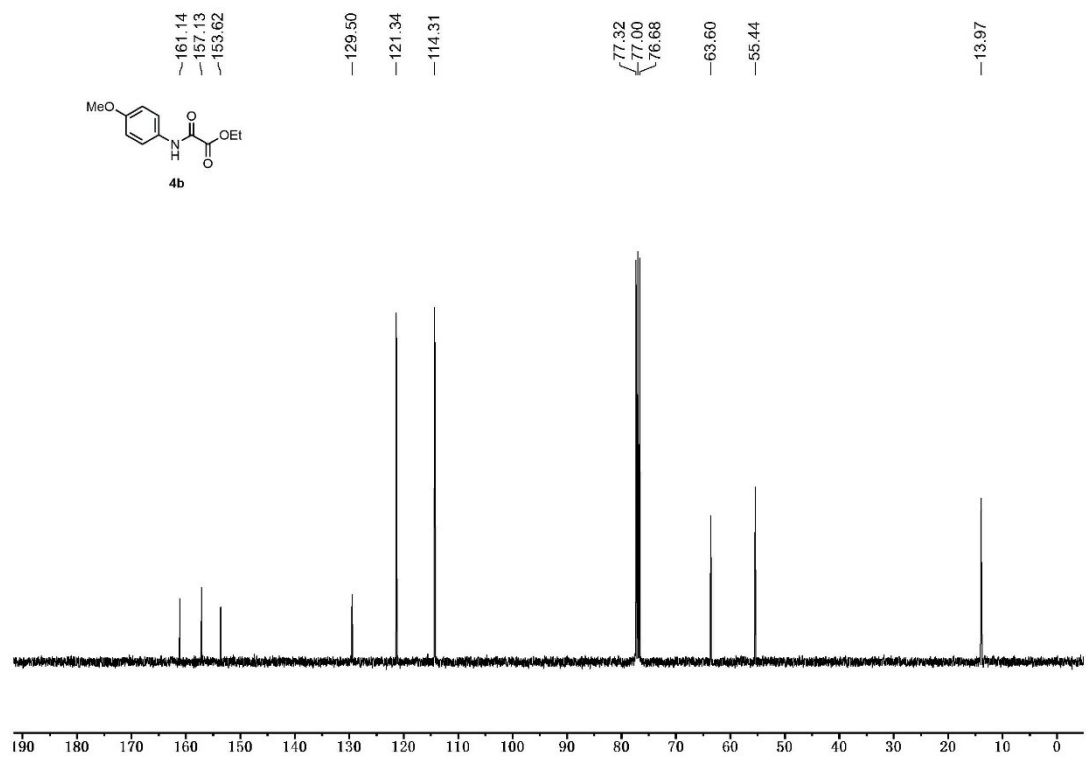



## 9. HPLC Spectra of Products

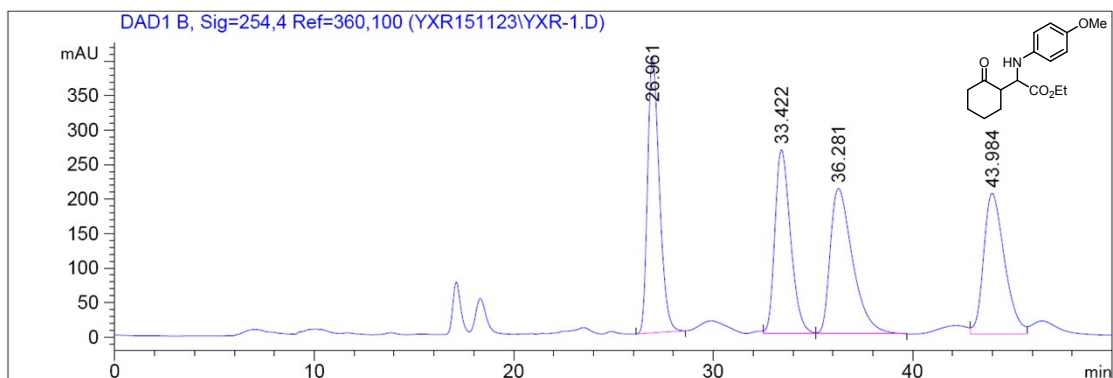

|   | Retention Time/min | Int Type | Width/min | Area/mAU              | Height/mAU | Area/%  |
|---|--------------------|----------|-----------|-----------------------|------------|---------|
| 1 | 26.961             | BB       | 0.6206    | 1.64128e <sup>4</sup> | 400.10571  | 26.3730 |
| 2 | 33.422             | MF R     | 0.9083    | 1.45368e <sup>4</sup> | 266.74786  | 23.3586 |
| 3 | 36.281             | FM R     | 1.2968    | 1.64028e <sup>4</sup> | 210.80472  | 26.3570 |
| 4 | 43.984             | MF R     | 1.2159    | 1.48808e <sup>4</sup> | 203.98376  | 23.9114 |

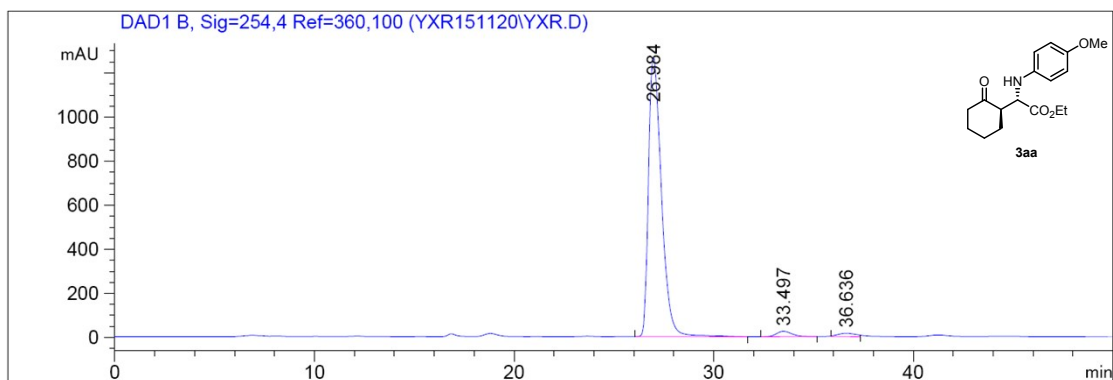

|   | Retention Time/min | Int Type | Width/min | Area/mAU              | Height/mAU | Area/%  |
|---|--------------------|----------|-----------|-----------------------|------------|---------|
| 1 | 26.984             | BB       | 0.7059    | 5.68674e <sup>4</sup> | 1266.36841 | 96.3361 |
| 2 | 33.497             | BB       | 0.7860    | 1253.94861            | 24.06038   | 2.1242  |
| 3 | 36.636             | MF R     | 1.0386    | 908.85608             | 14.58487   | 1.5396  |

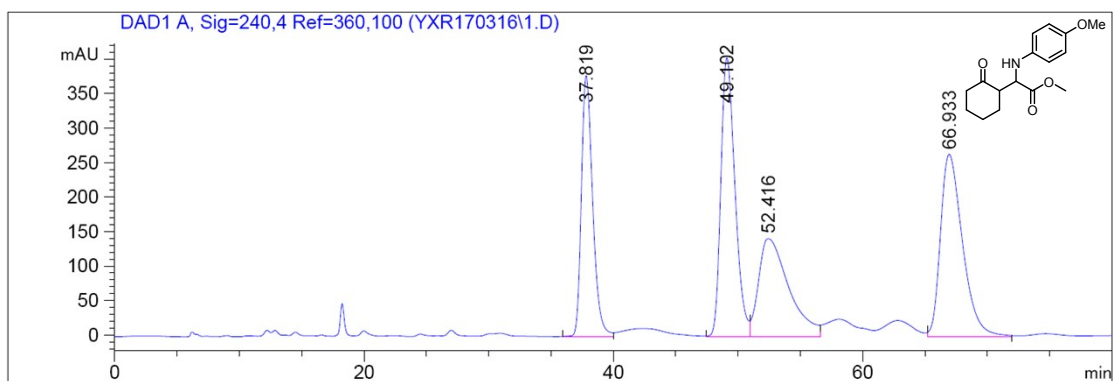

|   | Retention Time/min | Int Type | Width/min | Area/mAU              | Height/mAU | Area/%  |
|---|--------------------|----------|-----------|-----------------------|------------|---------|
| 1 | 37.819             | MF R     | 1.0519    | 2.39149e <sup>4</sup> | 378.91815  | 21.3655 |
| 2 | 49.102             | MF R     | 1.3108    | 3.17674e <sup>4</sup> | 403.92010  | 28.3809 |
| 3 | 52.416             | MF R     | 2.7999    | 2.38113e <sup>4</sup> | 141.74095  | 21.2729 |
| 4 | 66.933             | FM R     | 2.0466    | 3.24388e <sup>4</sup> | 264.17184  | 28.9807 |

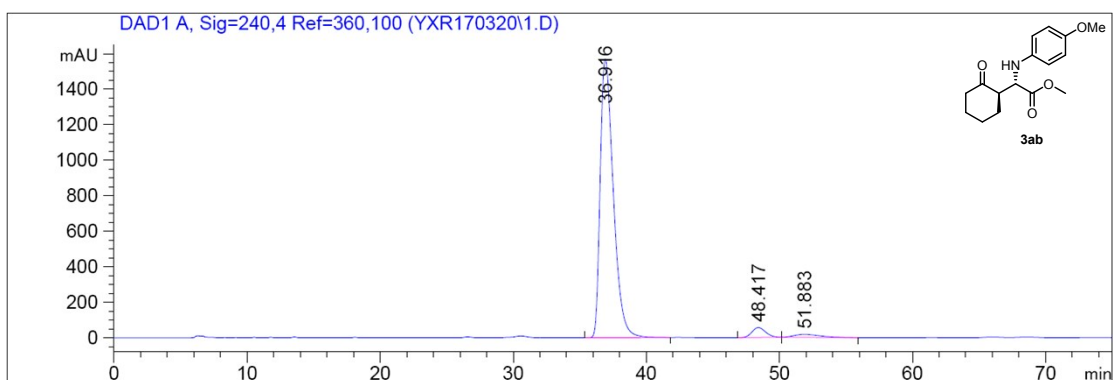

|   | Retention Time/min | Int Type | Width/min | Area/mAU              | Height/mAU | Area/%  |
|---|--------------------|----------|-----------|-----------------------|------------|---------|
| 1 | 36.916             | BB       | 1.0617    | 1.07321e <sup>5</sup> | 1569.67249 | 94.6216 |
| 2 | 48.417             | BB       | 1.0794    | 3930.50757            | 55.55710   | 3.4654  |
| 3 | 51.883             | BB       | 1.5903    | 2169.69946            | 16.34878   | 1.9130  |

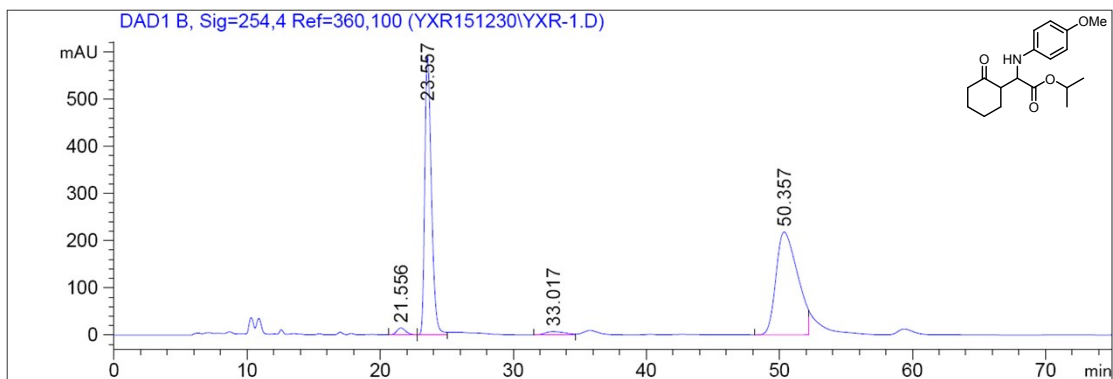

|   | Retention Time/min | Int Type | Width/min | Area/mAU              | Height/mAU | Area/%  |
|---|--------------------|----------|-----------|-----------------------|------------|---------|
| 1 | 21.556             | MF R     | 0.8013    | 719.61206             | 14.96757   | 1.5437  |
| 2 | 23.557             | MF R     | 0.5816    | 2.06285e <sup>4</sup> | 591.18707  | 44.2517 |
| 3 | 33.017             | MF R     | 1.7458    | 753.37457             | 7.19218    | 1.6161  |
| 4 | 50.357             | MF R     | 1.8731    | 2.45148e <sup>4</sup> | 218.13148  | 52.5885 |

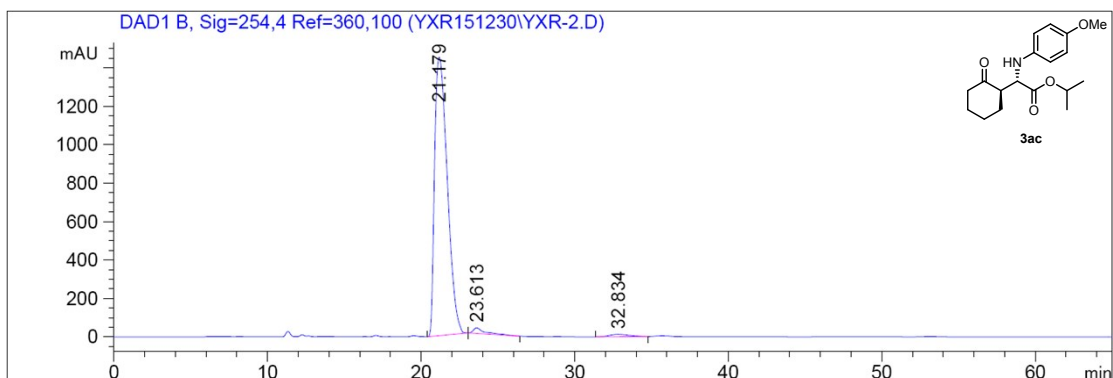

|   | Retention Time/min | Int Type | Width/min | Area/mAU              | Height/mAU | Area/%  |
|---|--------------------|----------|-----------|-----------------------|------------|---------|
| 1 | 21.179             | BB       | 0.9068    | 8.30781e <sup>4</sup> | 1449.31104 | 96.9333 |
| 2 | 23.613             | BB       | 0.7515    | 1571.80396            | 29.13138   | 1.8339  |
| 3 | 32.834             | BB       | 1.1409    | 1056.51501            | 11.93337   | 1.2327  |

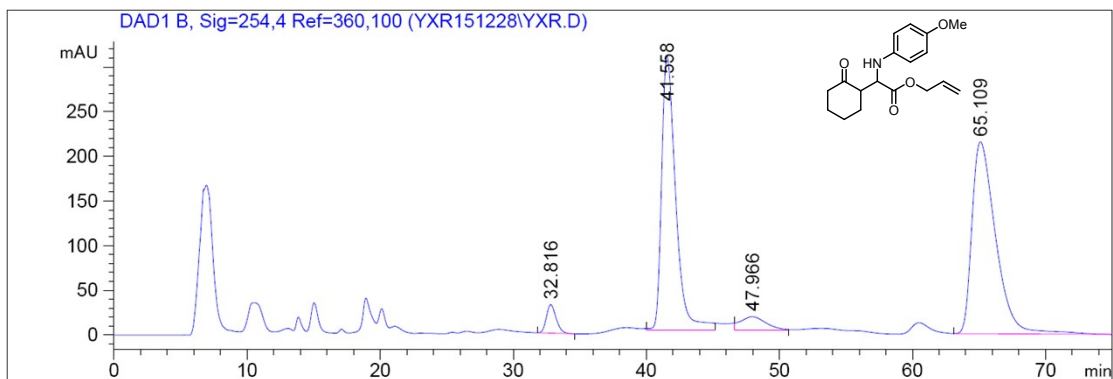

|   | Retention Time/min | Int Type | Width/min | Area/mAU              | Height/mAU | Area/%  |
|---|--------------------|----------|-----------|-----------------------|------------|---------|
| 1 | 32.816             | BB       | 0.7704    | 1627.71936            | 31.95047   | 3.0849  |
| 2 | 41.558             | MF R     | 1.2238    | 2.24986e <sup>4</sup> | 306.39633  | 42.6407 |
| 3 | 47.966             | FM R     | 2.1907    | 1938.35400            | 14.74679   | 3.6737  |
| 4 | 65.109             | BBA      | 1.8478    | 2.66986e <sup>4</sup> | 214.84842  | 50.6007 |

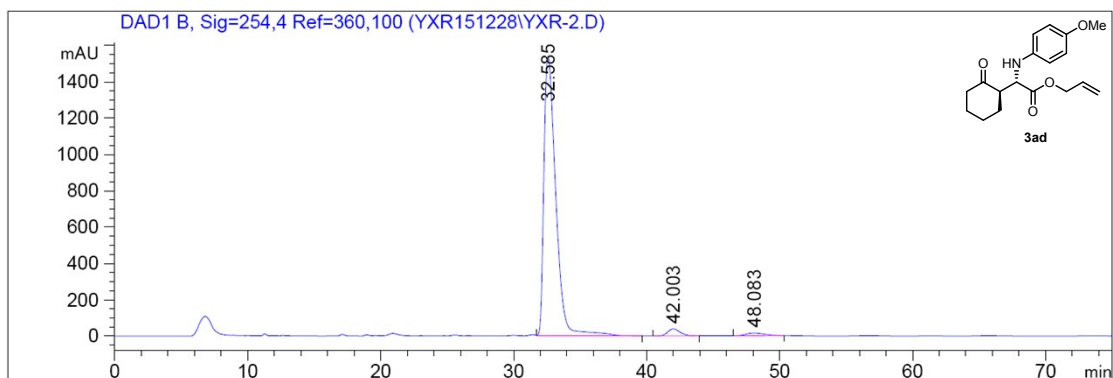

|   | Retention Time/min | Int Type | Width/min | Area/mAU              | Height/mAU | Area/%  |
|---|--------------------|----------|-----------|-----------------------|------------|---------|
| 1 | 32.585             | VB       | 0.9675    | 9.57220e <sup>4</sup> | 1535.10559 | 96.1787 |
| 2 | 42.003             | BB       | 0.9684    | 2445.66772            | 38.22931   | 2.4573  |
| 3 | 48.083             | BB       | 1.1482    | 1357.51318            | 14.42113   | 1.3640  |

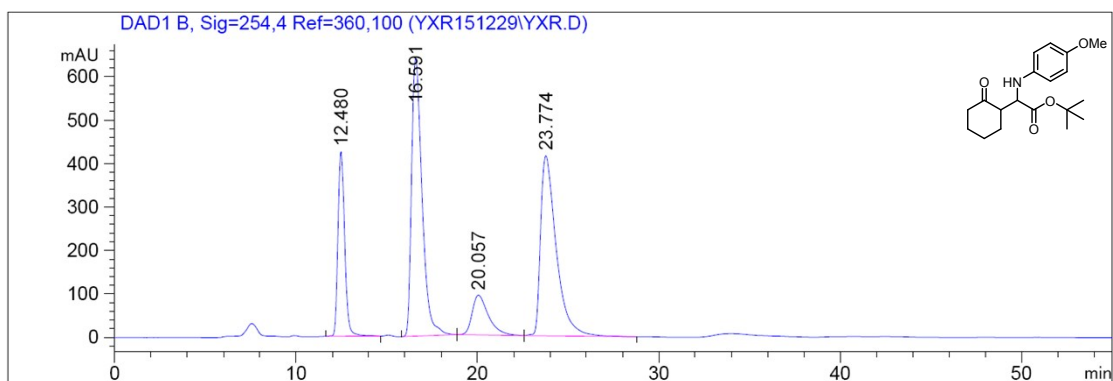

|   | Retention Time/min | Int Type | Width/min | Area/mAU              | Height/mAU | Area/%  |
|---|--------------------|----------|-----------|-----------------------|------------|---------|
| 1 | 12.480             | BB       | 0.4072    | 1.10388e <sup>4</sup> | 424.76489  | 16.3872 |
| 2 | 16.591             | BB       | 0.6157    | 2.57374e <sup>4</sup> | 639.24677  | 38.2073 |
| 3 | 20.057             | BB       | 0.9333    | 5707.25195            | 91.54926   | 8.4724  |
| 4 | 23.774             | BB       | 0.9027    | 2.48791e <sup>4</sup> | 414.26242  | 36.9331 |

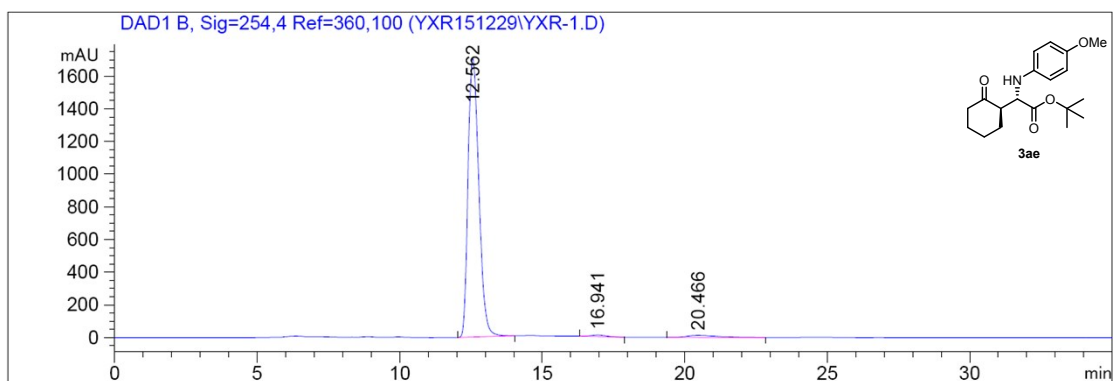

|   | Retention Time/min | Int Type | Width/min | Area/mAU              | Height/mAU | Area/%  |
|---|--------------------|----------|-----------|-----------------------|------------|---------|
| 1 | 12.562             | BB       | 0.4173    | 4.49208e <sup>4</sup> | 1705.15515 | 97.1530 |
| 2 | 16.941             | BB       | 0.5687    | 367.55658             | 9.59881    | 0.7949  |
| 3 | 20.466             | BB       | 1.0274    | 948.82098             | 12.61640   | 2.0521  |

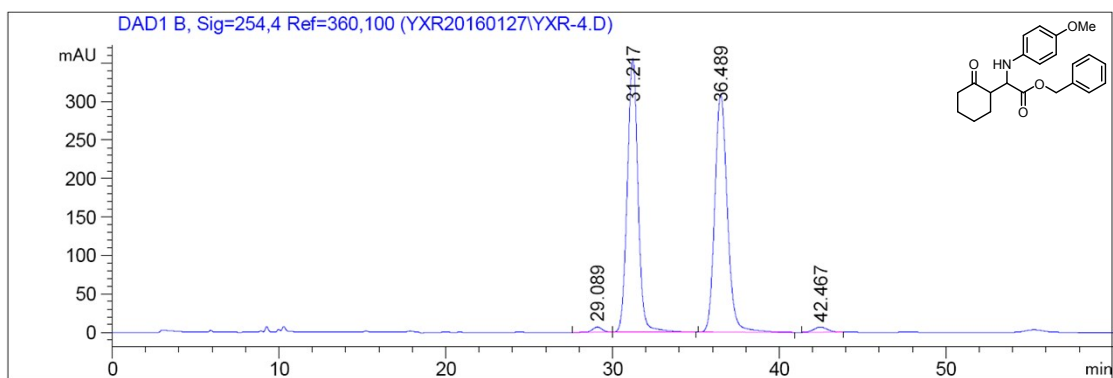

|   | Retention Time/min | Int Type | Width/min | Area/mAU              | Height/mAU | Area/%  |
|---|--------------------|----------|-----------|-----------------------|------------|---------|
| 1 | 29.089             | BB       | 0.5687    | 265.48087             | 6.69402    | 0.8143  |
| 2 | 31.217             | BB       | 0.6852    | 1.58246e <sup>4</sup> | 355.55719  | 48.5388 |
| 3 | 36.489             | BB       | 0.8033    | 1.61457e <sup>4</sup> | 309.17639  | 49.5237 |
| 4 | 42.467             | BB       | 0.7795    | 366.17697             | 6.53680    | 1.1232  |

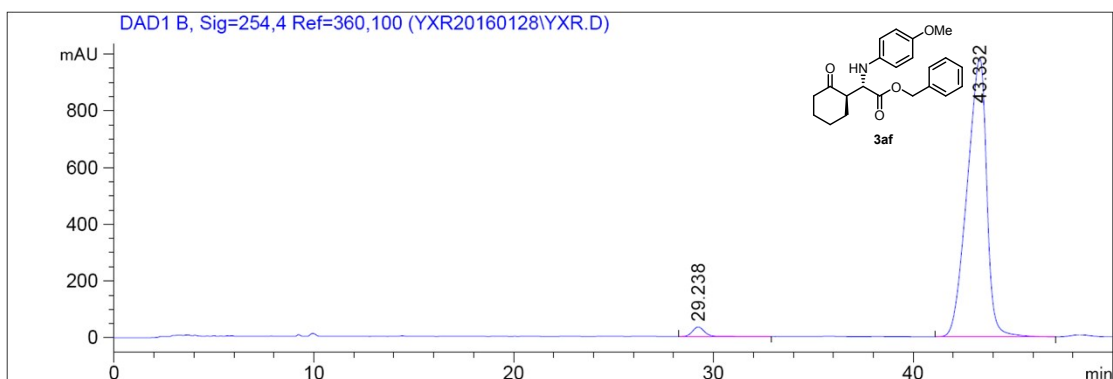

|   | Retention Time/min | Int Type | Width/min | Area/mAU              | Height/mAU | Area/%  |
|---|--------------------|----------|-----------|-----------------------|------------|---------|
| 1 | 29.238             | BB       | 0.6384    | 1402.90942            | 33.37512   | 2.0619  |
| 2 | 43.332             | BB       | 1.0561    | 6.66364e <sup>4</sup> | 981.46307  | 97.9381 |

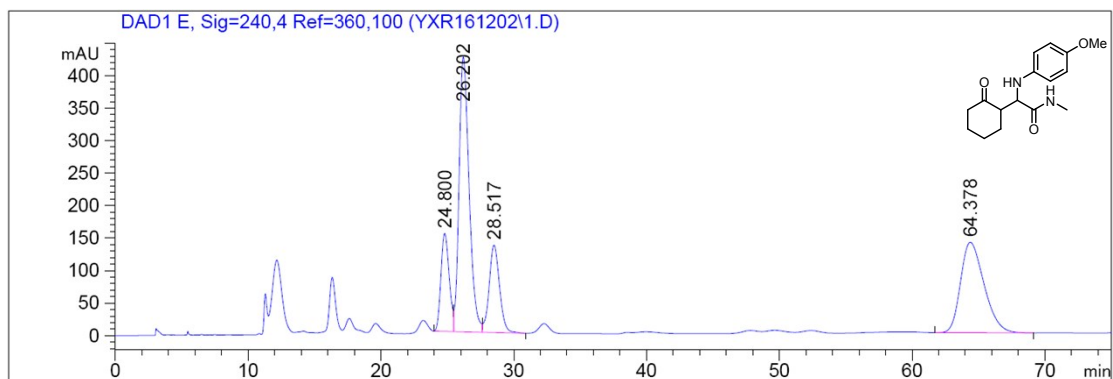

|   | Retention Time/min | Int Type | Width/min | Area/mAU              | Height/mAU | Area/%  |
|---|--------------------|----------|-----------|-----------------------|------------|---------|
| 1 | 24.800             | BV       | 0.6735    | 6507.24072            | 150.78763  | 12.2135 |
| 2 | 26.202             | VV       | 0.8048    | 2.22864e <sup>4</sup> | 422.94339  | 41.8293 |
| 3 | 28.517             | VB       | 0.8289    | 7324.91309            | 134.59164  | 13.7482 |
| 4 | 64.378             | BB       | 1.8811    | 1.71607e <sup>4</sup> | 139.31493  | 32.2090 |

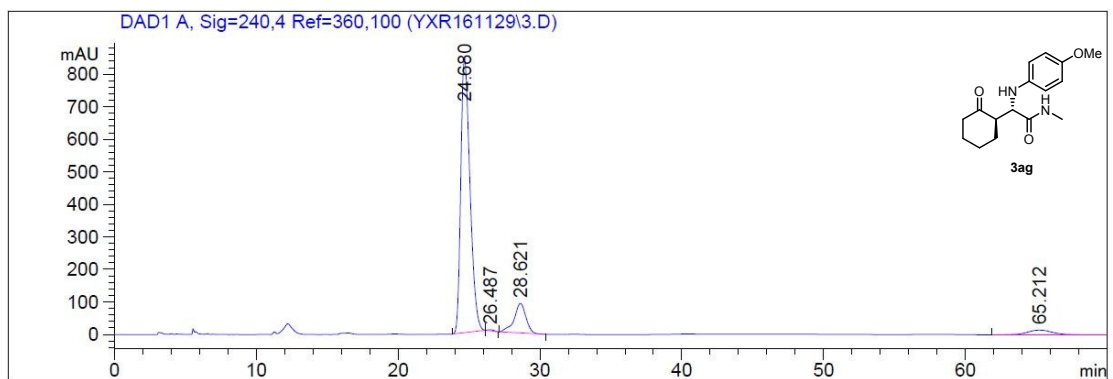

|   | Retention Time/min | Int Type | Width/min | Area/mAU              | Height/mAU | Area/%  |
|---|--------------------|----------|-----------|-----------------------|------------|---------|
| 1 | 24.680             | BB       | 0.6922    | 3.80140e <sup>4</sup> | 846.09918  | 83.9792 |
| 2 | 26.487             | BB       | 0.4678    | 97.12515              | 3.27726    | 0.2146  |
| 3 | 28.621             | BB       | 0.8708    | 5262.14990            | 90.97268   | 11.6250 |
| 4 | 65.212             | BBA      | 1.5419    | 1892.67114            | 14.76067   | 4.1812  |

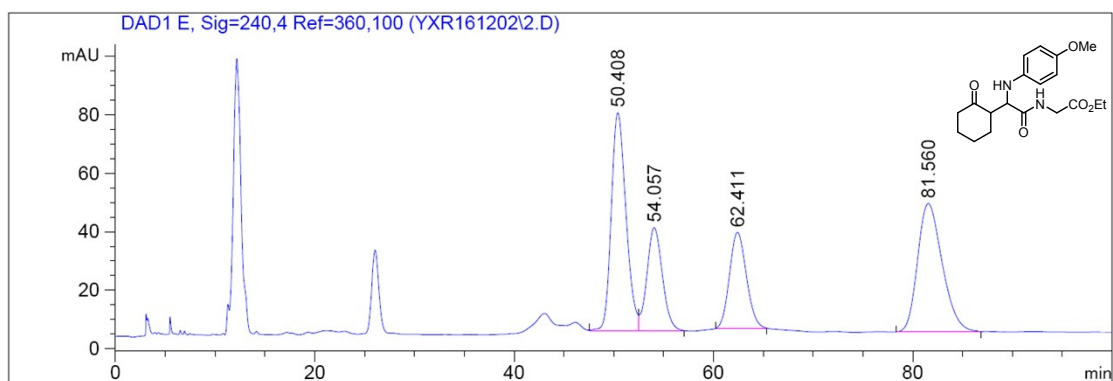

|   | Retention Time/min | Int Type | Width/min | Area/mAU   | Height/mAU | Area/%  |
|---|--------------------|----------|-----------|------------|------------|---------|
| 1 | 50.408             | MF R     | 1.7102    | 7639.75977 | 74.45250   | 33.3861 |
| 2 | 54.057             | FM R     | 1.7900    | 3785.00000 | 35.24250   | 16.5406 |
| 3 | 62.411             | MM R     | 1.9826    | 3929.45728 | 33.03288   | 17.1719 |
| 4 | 81.560             | MM R     | 2.8606    | 7528.83301 | 43.86533   | 32.9014 |

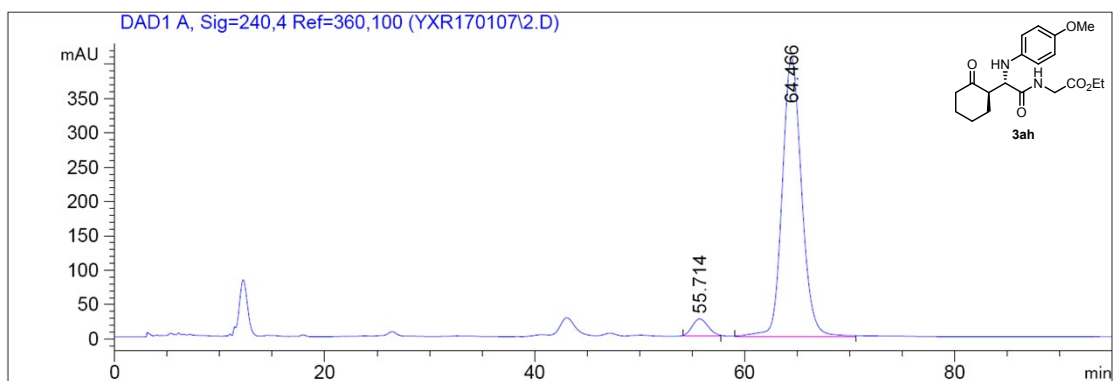

|   | Retention Time/min | Int Type | Width/min | Area/mAU              | Height/mAU | Area/%  |
|---|--------------------|----------|-----------|-----------------------|------------|---------|
| 1 | 55.714             | MM R     | 1.7412    | 2578.63525            | 24.68265   | 4.7101  |
| 2 | 64.466             | MM R     | 2.1424    | 5.21689e <sup>4</sup> | 405.83606  | 95.2899 |



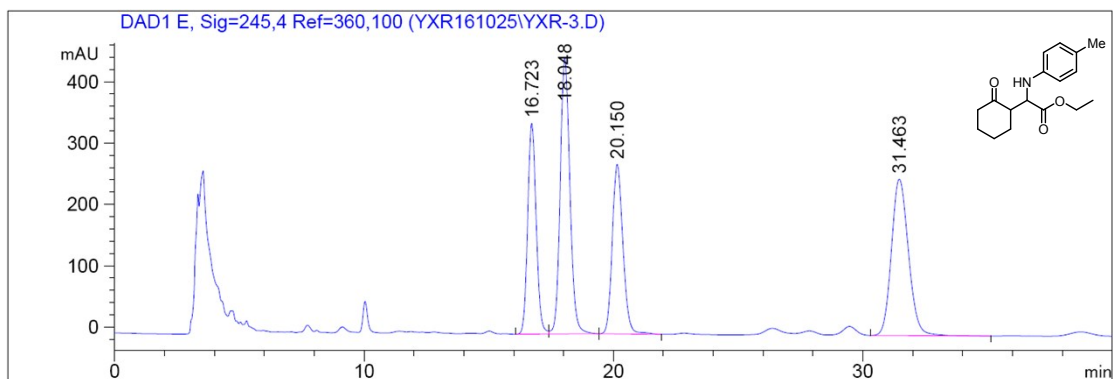

|   | Retention Time/min | Int Type | Width/min | Area/mAU              | Height/mAU | Area/%  |
|---|--------------------|----------|-----------|-----------------------|------------|---------|
| 1 | 16.723             | BV       | 0.3685    | 8139.15527            | 343.39212  | 20.0163 |
| 2 | 18.048             | VB       | 0.4200    | 1.22179e <sup>4</sup> | 451.10236  | 30.0469 |
| 3 | 20.150             | BB       | 0.4602    | 8245.63574            | 276.29492  | 20.2782 |
| 4 | 31.463             | BB       | 0.7320    | 1.20600e <sup>4</sup> | 254.88084  | 29.6587 |

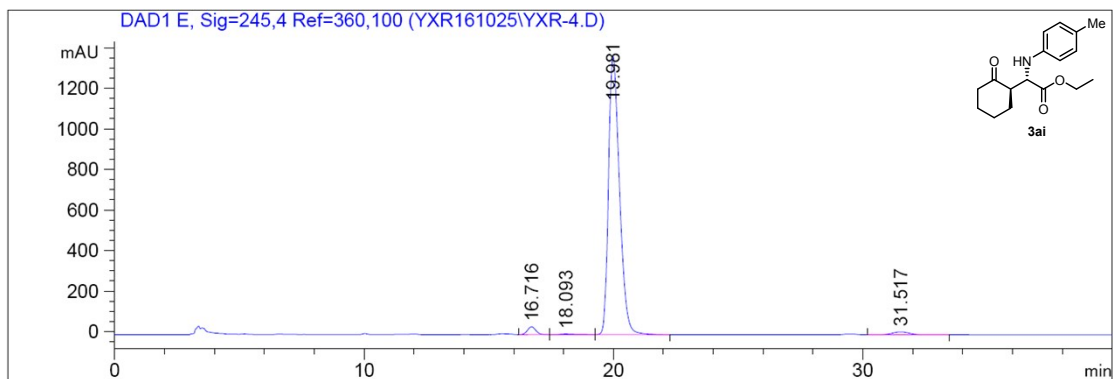

|   | Retention Time/min | Int Type | Width/min | Area/mAU              | Height/mAU | Area/%  |
|---|--------------------|----------|-----------|-----------------------|------------|---------|
| 1 | 16.716             | BB       | 0.3587    | 877.37262             | 38.10011   | 2.0202  |
| 2 | 18.093             | BB       | 0.5269    | 101.24154             | 2.77972    | 0.2331  |
| 3 | 19.981             | BB       | 0.4689    | 4.17906e <sup>4</sup> | 1373.71838 | 96.2251 |
| 4 | 31.517             | BB       | 0.7097    | 660.81287             | 14.17958   | 1.5216  |

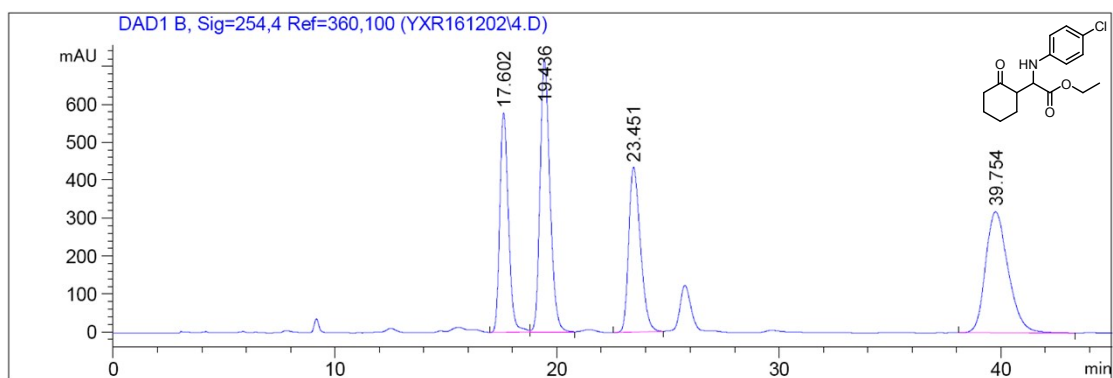

|   | Retention Time/min | Int Type | Width/min | Area/mAU              | Height/mAU | Area/%  |
|---|--------------------|----------|-----------|-----------------------|------------|---------|
| 1 | 17.602             | BV       | 0.4183    | 1.56543e <sup>4</sup> | 577.46283  | 20.4401 |
| 2 | 19.436             | VB       | 0.4792    | 2.23824e <sup>4</sup> | 718.99091  | 29.2250 |
| 3 | 23.451             | BB       | 0.5647    | 1.58927e <sup>4</sup> | 434.54868  | 20.7513 |
| 4 | 39.754             | BB       | 1.0823    | 2.26571e <sup>4</sup> | 319.14008  | 29.5837 |

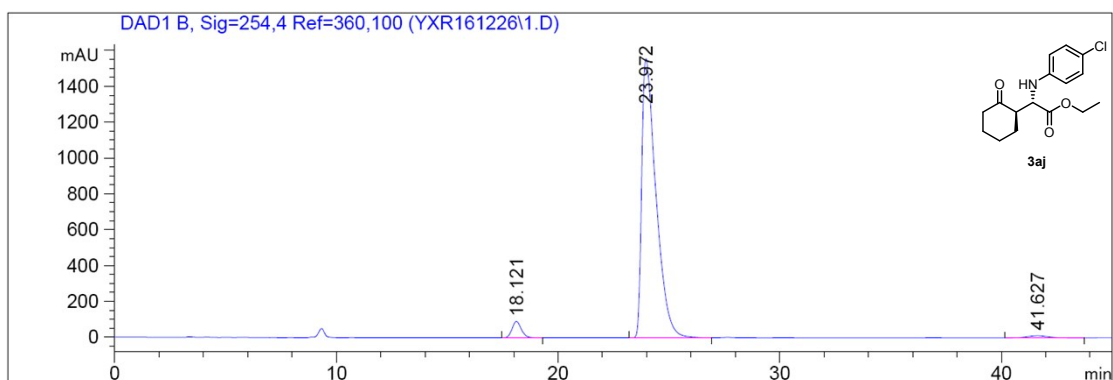

|   | Retention Time/min | Int Type | Width/min | Area/mAU              | Height/mAU | Area/%  |
|---|--------------------|----------|-----------|-----------------------|------------|---------|
| 1 | 18.121             | BB       | 0.4476    | 2622.35889            | 90.63425   | 3.5982  |
| 2 | 23.972             | BB       | 0.6588    | 6.94871e <sup>4</sup> | 1556.57288 | 95.3455 |
| 3 | 41.627             | BB       | 0.9361    | 769.82233             | 11.75377   | 1.0563  |

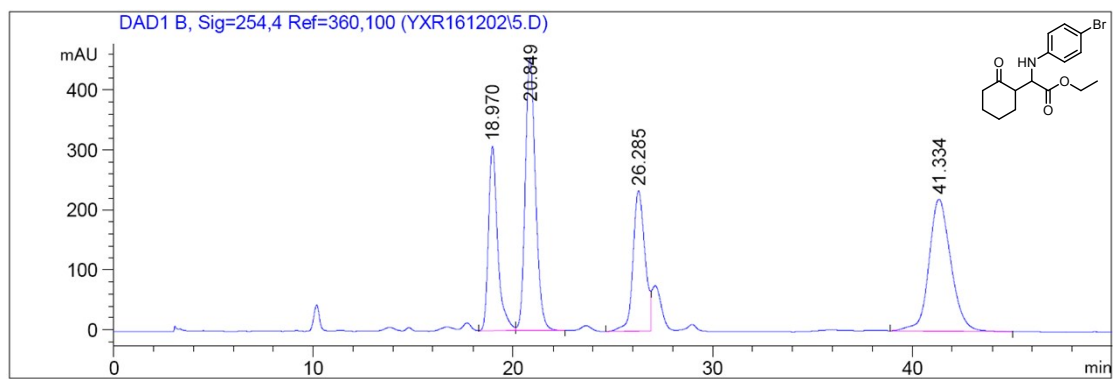

|   | Retention Time/min | Int Type | Width/min | Area/mAU              | Height/mAU | Area/%  |
|---|--------------------|----------|-----------|-----------------------|------------|---------|
| 1 | 18.970             | BV       | 0.4913    | 9945.35840            | 307.48956  | 18.8934 |
| 2 | 20.849             | VB       | 0.5477    | 1.62158e <sup>4</sup> | 455.13074  | 30.8056 |
| 3 | 26.285             | BV       | 0.6310    | 9676.06543            | 233.73955  | 18.3819 |
| 4 | 41.334             | BB       | 1.1366    | 1.68020e <sup>4</sup> | 220.08995  | 31.9191 |

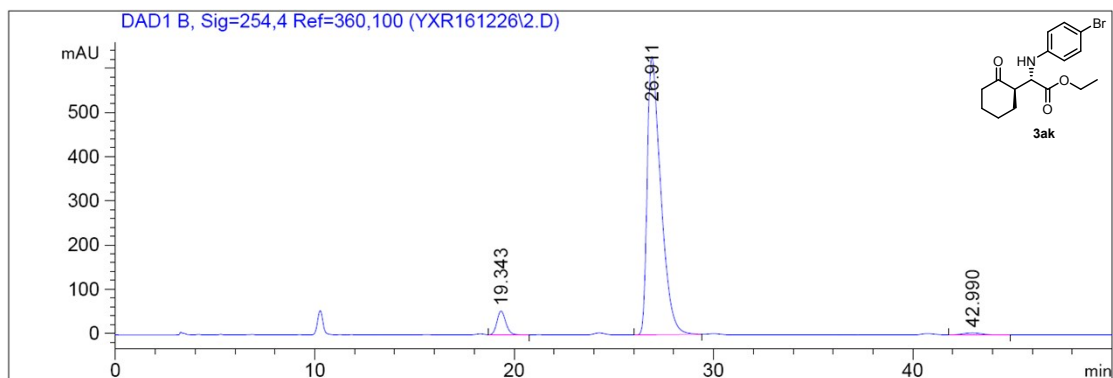

|   | Retention Time/min | Int Type | Width/min | Area/mAU              | Height/mAU | Area/%  |
|---|--------------------|----------|-----------|-----------------------|------------|---------|
| 1 | 19.343             | BB       | 0.4779    | 1643.26257            | 53.56564   | 5.1832  |
| 2 | 26.911             | BB       | 0.6982    | 2.97772e <sup>4</sup> | 629.17181  | 93.9234 |
| 3 | 42.990             | BB       | 0.7934    | 283.24747             | 4.34010    | 0.8934  |

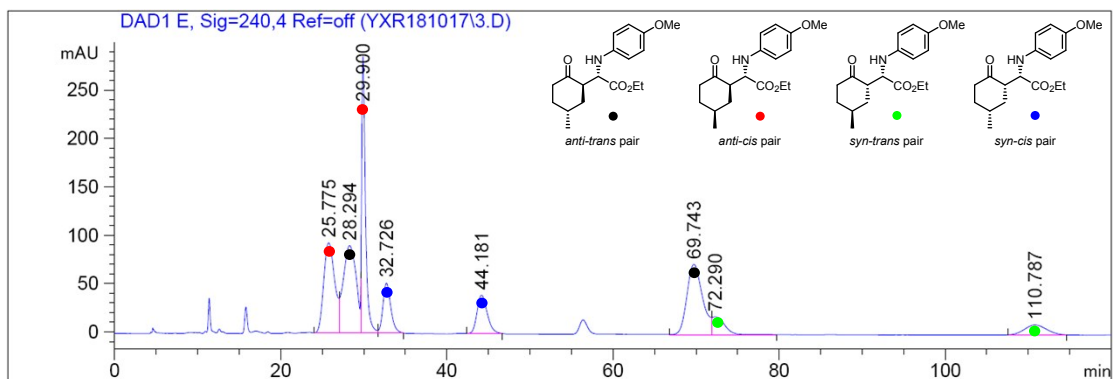

|   | Retention Time/min | Int Type | Width/min | Area/mAU   | Height/mAU | Area/%  |
|---|--------------------|----------|-----------|------------|------------|---------|
| 1 | 25.775             | MF R     | 1.5453    | 8648.95703 | 93.28068   | 18.1414 |
| 2 | 28.294             | MF R     | 1.8000    | 9762.12695 | 90.38831   | 20.4763 |
| 3 | 29.900             | MF R     | 0.5243    | 8988.58008 | 285.70557  | 18.8537 |
| 4 | 32.726             | FM R     | 1.0962    | 3386.82227 | 51.49301   | 7.1039  |
| 5 | 44.181             | MM R     | 1.4237    | 3392.81348 | 39.71836   | 7.1165  |
| 6 | 69.743             | MF R     | 2.1683    | 9480.44531 | 72.87189   | 19.8854 |
| 7 | 72.290             | FM R     | 1.8206    | 2020.53516 | 18.49733   | 4.2381  |
| 8 | 110.787            | MM R     | 3.1644    | 1995.02429 | 10.50763   | 4.1846  |

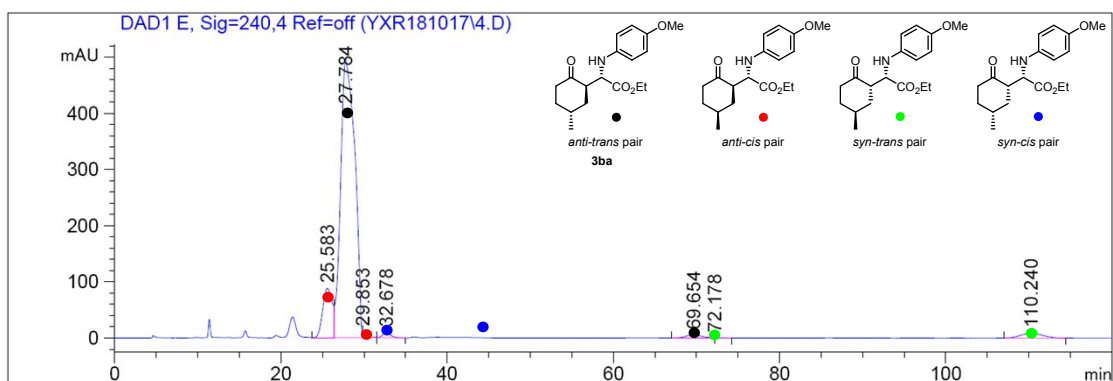

|   | Retention Time/min | Int Type | Width/min | Area/mAU              | Height/mAU             | Area/%  |
|---|--------------------|----------|-----------|-----------------------|------------------------|---------|
| 1 | 25.583             | BV       | 1.2009    | 6874.89551            | 87.67223               | 9.9596  |
| 2 | 27.784             | MF R     | 1.9710    | 5.87322e <sup>4</sup> | 496.63663              | 85.0850 |
| 3 | 29.853             | FM R     | 0.3868    | 253.49452             | 10.92275               | 0.3672  |
| 4 | 32.678             | BB       | 0.9549    | 628.64197             | 9.63823                | 0.9107  |
| 5 | 69.654             | MF R     | 2.2387    | 788.02264             | 5.86657                | 1.1416  |
| 6 | 72.178             | FM R     | 0.9392    | 47.69592              | 8.46398e <sup>-1</sup> | 0.0691  |
| 7 | 110.240            | MM R     | 3.2217    | 1702.75513            | 8.80865                | 2.4668  |

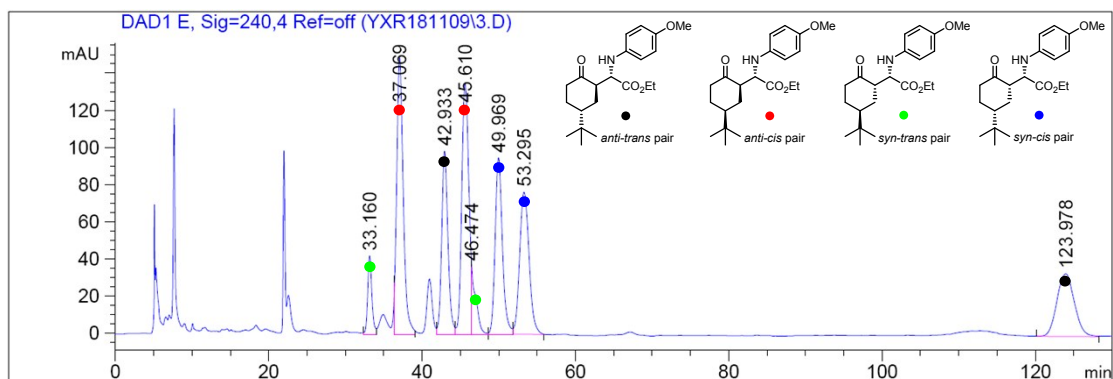

|   | Retention Time/min | Int Type | Width/min | Area/mAU   | Height/mAU | Area/%  |
|---|--------------------|----------|-----------|------------|------------|---------|
| 1 | 33.160             | MF R     | 0.6294    | 1590.87048 | 42.12516   | 3.6118  |
| 2 | 37.069             | FM R     | 0.9713    | 8675.65820 | 148.86310  | 19.6969 |
| 3 | 42.933             | MF R     | 0.9434    | 5576.89502 | 98.52335   | 12.6616 |
| 4 | 45.610             | FM R     | 1.0704    | 8683.78516 | 135.20578  | 19.7153 |
| 5 | 46.474             | MF R     | 0.5437    | 1342.08203 | 36.39882   | 3.0470  |
| 6 | 49.969             | MF R     | 1.0992    | 6264.93652 | 94.98831   | 14.2237 |
| 7 | 53.295             | FM R     | 1.4283    | 6551.14795 | 76.44254   | 14.8735 |
| 8 | 123.978            | MM R     | 2.6462    | 5360.50000 | 33.76182   | 12.1703 |

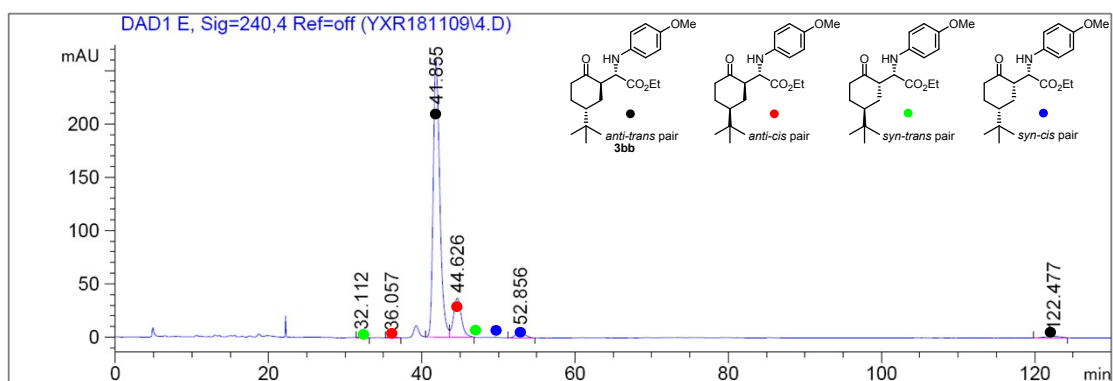

|   | Retention Time/min | Int Type | Width/min | Area/mAU              | Height/mAU | Area/%  |
|---|--------------------|----------|-----------|-----------------------|------------|---------|
| 1 | 32.112             | MM R     | 0.5993    | 89.42572              | 2.48698    | 0.4690  |
| 2 | 36.057             | MM R     | 0.9311    | 116.05249             | 2.07725    | 0.6086  |
| 3 | 41.855             | MF R     | 0.9932    | 1.55158e <sup>4</sup> | 260.37131  | 81.3716 |
| 4 | 44.626             | FM R     | 1.1987    | 2625.77246            | 36.50734   | 13.7707 |
| 5 | 52.856             | BB       | 0.9398    | 501.04181             | 6.68977    | 2.6277  |
| 6 | 122.477            | MF R     | 2.3488    | 219.74570             | 1.55930    | 1.1524  |

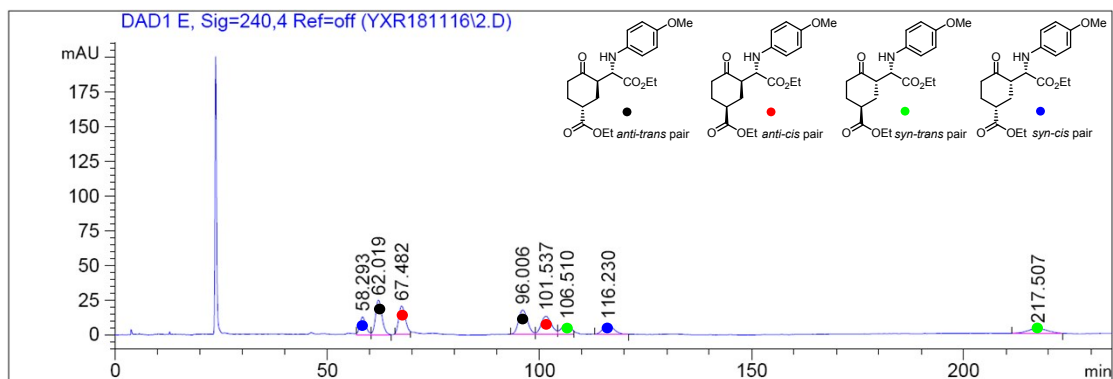

|   | Retention Time/min | Int Type | Width/min | Area/mAU   | Height/mAU | Area/%  |
|---|--------------------|----------|-----------|------------|------------|---------|
| 1 | 58.293             | MF R     | 1.6319    | 1252.26697 | 12.78979   | 8.6242  |
| 2 | 62.019             | FM R     | 1.7766    | 2653.03931 | 24.88813   | 18.2712 |
| 3 | 67.482             | MF R     | 1.8300    | 2227.51685 | 20.28715   | 15.3406 |
| 4 | 96.006             | MF R     | 2.4921    | 2645.94629 | 17.69587   | 18.2223 |
| 5 | 101.537            | MF R     | 2.8316    | 2231.03540 | 13.13174   | 15.3649 |
| 6 | 106.510            | MF R     | 2.6797    | 1140.50696 | 7.09347    | 7.8545  |
| 7 | 116.230            | MM R     | 3.0170    | 1243.01794 | 6.86680    | 8.5605  |
| 8 | 217.507            | MM R     | 5.2947    | 1127.03418 | 3.54768    | 7.7617  |

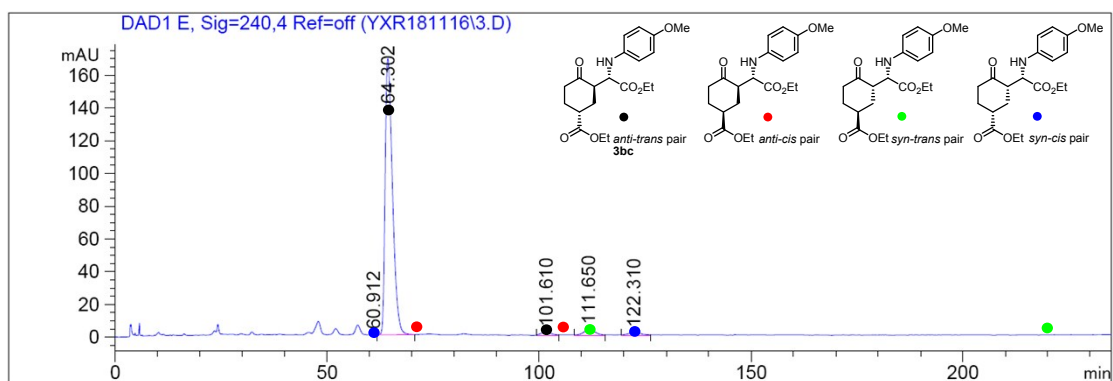

|   | Retention Time/min | Int Type | Width/min | Area/mAU              | Height/mAU             | Area/%  |
|---|--------------------|----------|-----------|-----------------------|------------------------|---------|
| 1 | 60.912             | MM R     | 0.8533    | 15.21683              | 2.97207e <sup>-1</sup> | 0.0707  |
| 2 | 64.302             | BB       | 1.6641    | 2.02146e <sup>4</sup> | 168.68474              | 93.9834 |
| 3 | 101.610            | MF R     | 2.5721    | 312.47040             | 2.02473                | 1.4528  |
| 4 | 111.650            | MF R     | 3.1570    | 617.82831             | 3.26164                | 2.8725  |
| 5 | 122.310            | MF R     | 3.3955    | 348.57495             | 1.71097                | 1.6206  |

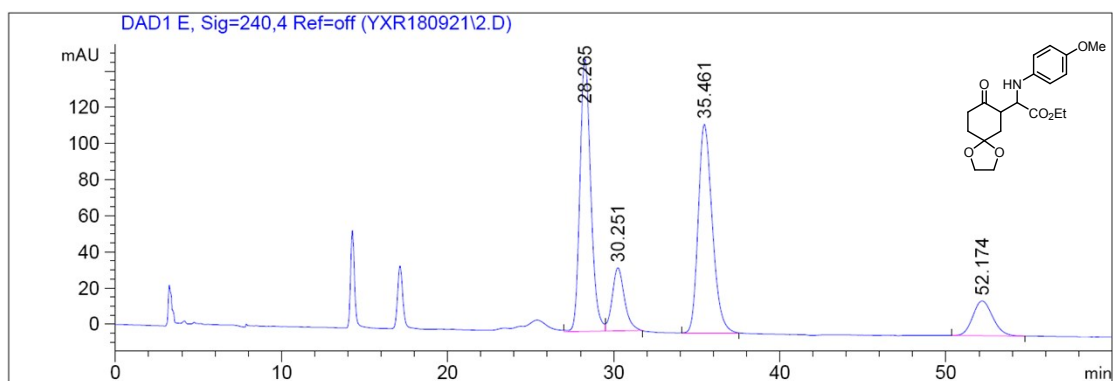

|   | Retention Time/min | Int Type | Width/min | Area/mAU   | Height/mAU | Area/%  |
|---|--------------------|----------|-----------|------------|------------|---------|
| 1 | 28.265             | MF R     | 0.7557    | 6843.88477 | 150.93642  | 40.1145 |
| 2 | 30.251             | FM R     | 0.8562    | 1792.38525 | 34.89219   | 10.5058 |
| 3 | 35.461             | MM R     | 0.9841    | 6818.17529 | 115.47246  | 39.9638 |
| 4 | 52.174             | BB       | 1.1656    | 1606.44617 | 19.25038   | 9.4160  |

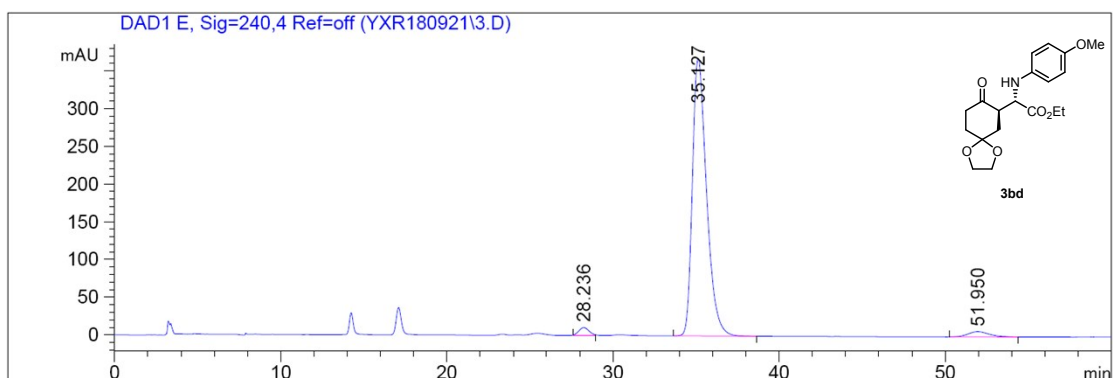

|   | Retention Time/min | Int Type | Width/min | Area/mAU              | Height/mAU | Area/%  |
|---|--------------------|----------|-----------|-----------------------|------------|---------|
| 1 | 28.236             | FM R     | 0.7186    | 457.05353             | 10.60001   | 2.0013  |
| 2 | 35.127             | BB       | 0.9113    | 2.17716e <sup>4</sup> | 367.40143  | 95.3293 |
| 3 | 51.950             | BB       | 1.0441    | 609.66241             | 6.95890    | 2.6695  |

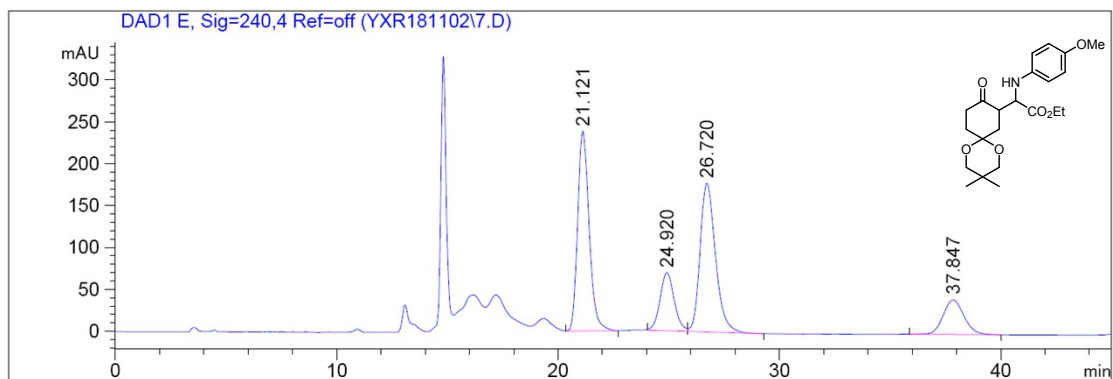

|   | Retention Time/min | Int Type | Width/min | Area/mAU   | Height/mAU | Area/%  |
|---|--------------------|----------|-----------|------------|------------|---------|
| 1 | 21.121             | BB       | 0.5560    | 8568.58301 | 238.03221  | 37.3226 |
| 2 | 24.920             | FM R     | 0.7424    | 3088.10522 | 69.33035   | 13.4510 |
| 3 | 26.720             | VB       | 0.7411    | 8594.98828 | 177.44193  | 37.4376 |
| 4 | 37.847             | BB       | 0.9963    | 2706.48364 | 41.31455   | 11.7888 |

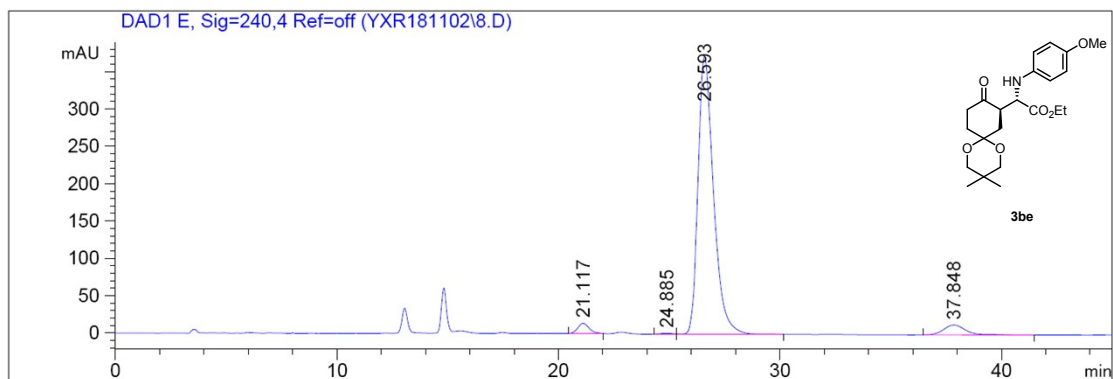

|   | Retention Time/min | Int Type | Width/min | Area/mAU              | Height/mAU | Area/%  |
|---|--------------------|----------|-----------|-----------------------|------------|---------|
| 1 | 21.117             | MM R     | 0.5916    | 480.83185             | 13.54584   | 2.4570  |
| 2 | 24.885             | FM R     | 0.6930    | 56.66631              | 1.36289    | 0.2896  |
| 3 | 26.593             | FM R     | 0.8125    | 1.81261e <sup>4</sup> | 371.81287  | 92.6215 |
| 4 | 37.848             | BB       | 1.0120    | 906.48230             | 13.15326   | 4.6320  |



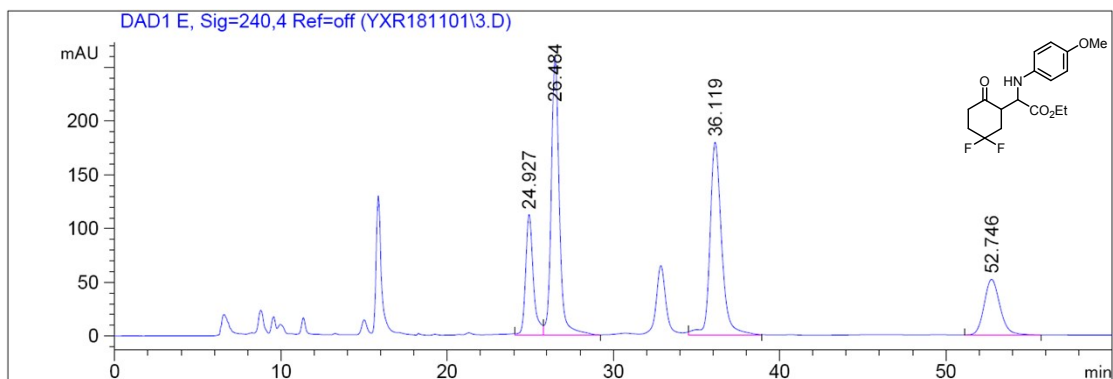

|   | Retention Time/min | Int Type | Width/min | Area/mAU   | Height/mAU | Area/%  |
|---|--------------------|----------|-----------|------------|------------|---------|
| 1 | 24.927             | FM R     | 0.5392    | 3626.10303 | 112.08134  | 14.7183 |
| 2 | 26.484             | VB       | 0.5107    | 8753.07520 | 258.75537  | 35.5285 |
| 3 | 36.119             | FM R     | 0.8153    | 8780.93945 | 179.49423  | 35.6416 |
| 4 | 52.746             | MM R     | 1.1158    | 3476.62036 | 51.93158   | 14.1115 |

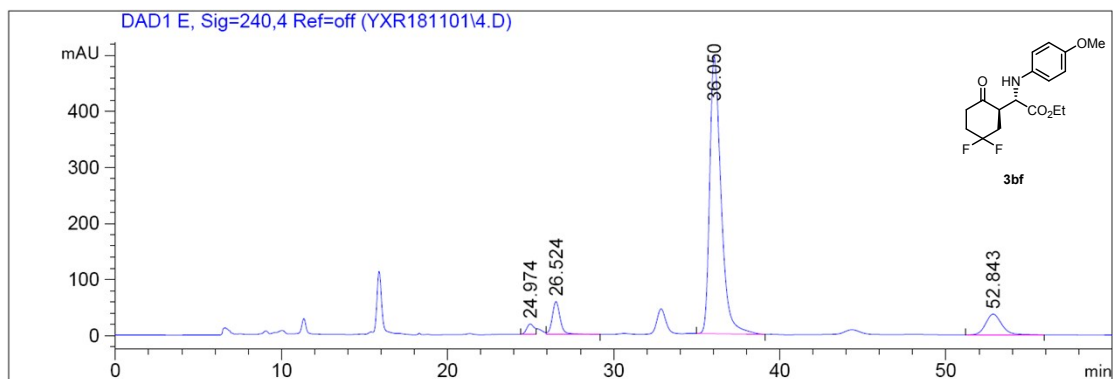

|   | Retention Time/min | Int Type | Width/min | Area/mAU              | Height/mAU | Area/%  |
|---|--------------------|----------|-----------|-----------------------|------------|---------|
| 1 | 24.974             | FM R     | 0.5059    | 565.50781             | 18.63091   | 1.9851  |
| 2 | 26.524             | VB       | 0.5074    | 1941.65588            | 58.47685   | 6.8159  |
| 3 | 36.050             | BB       | 0.7188    | 2.35266e <sup>4</sup> | 494.72998  | 82.5867 |
| 4 | 52.843             | BB       | 1.0172    | 2453.38916            | 36.82735   | 8.6123  |

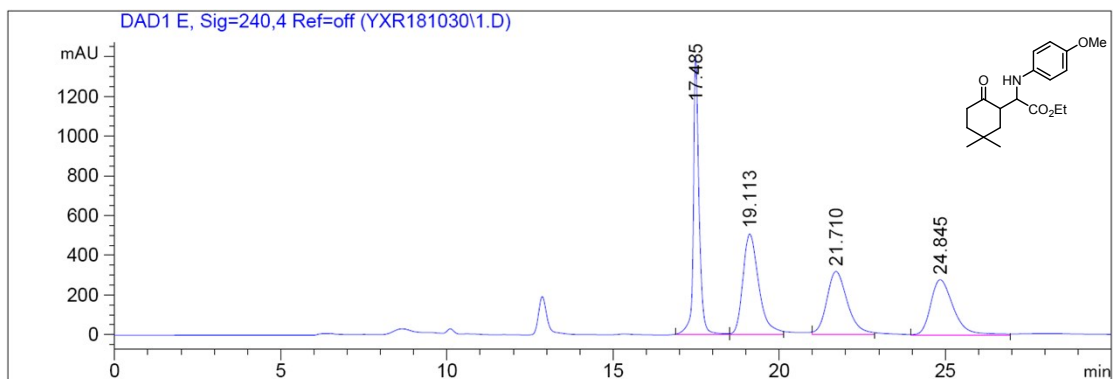

|   | Retention Time/min | Int Type | Width/min | Area/mAU              | Height/mAU | Area/%  |
|---|--------------------|----------|-----------|-----------------------|------------|---------|
| 1 | 17.485             | MF R     | 0.1974    | 1.65669e <sup>4</sup> | 1398.50879 | 27.3966 |
| 2 | 19.113             | MF R     | 0.5530    | 1.67565e <sup>4</sup> | 505.01651  | 27.7102 |
| 3 | 21.710             | MF R     | 0.7164    | 1.35997e <sup>4</sup> | 316.37378  | 22.4898 |
| 4 | 24.845             | MM R     | 0.8064    | 1.35475e <sup>4</sup> | 280.00269  | 22.4034 |

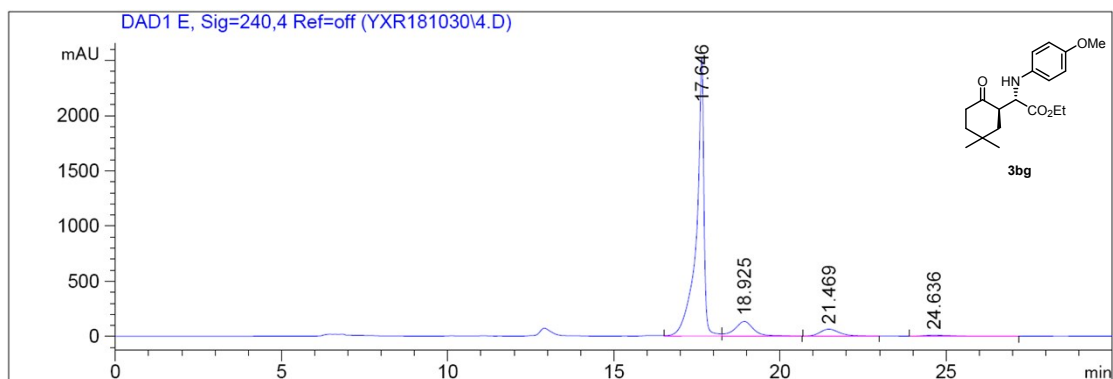

|   | Retention Time/min | Int Type | Width/min | Area/mAU              | Height/mAU | Area/%  |
|---|--------------------|----------|-----------|-----------------------|------------|---------|
| 1 | 17.646             | VV       | 0.2118    | 3.93176e <sup>4</sup> | 2523.68140 | 83.1092 |
| 2 | 18.925             | VB       | 0.5720    | 5111.66016            | 132.52692  | 10.8050 |
| 3 | 21.469             | BB       | 0.6077    | 2460.28857            | 62.16716   | 5.2005  |
| 4 | 24.636             | BB       | 0.7459    | 418.78873             | 7.95900    | 0.8852  |

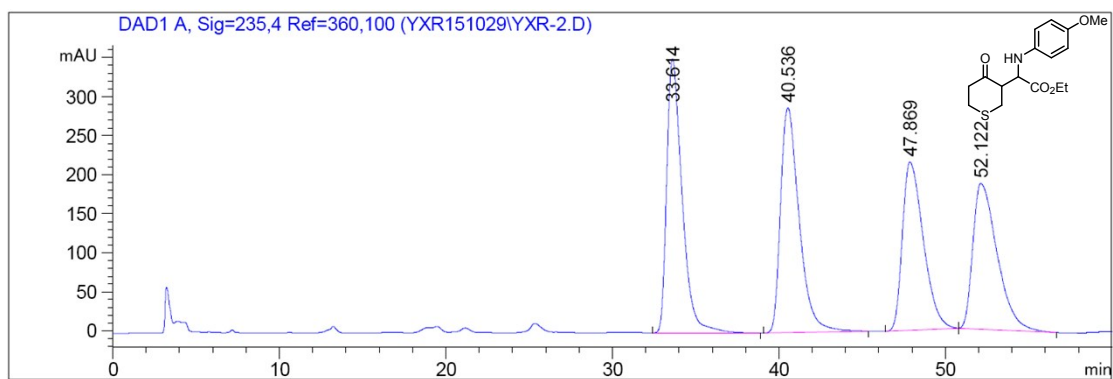

|   | Retention Time/min | Int Type | Width/min | Area/mAU              | Height/mAU | Area/%  |
|---|--------------------|----------|-----------|-----------------------|------------|---------|
| 1 | 33.614             | BB       | 0.9849    | 2.24670e <sup>4</sup> | 350.92899  | 27.1805 |
| 2 | 40.536             | BB       | 1.1525    | 2.24069e <sup>4</sup> | 287.73294  | 27.1078 |
| 3 | 47.869             | BB       | 1.3685    | 1.88136e <sup>4</sup> | 215.50777  | 22.7606 |
| 4 | 52.122             | BB       | 1.5440    | 1.89711e <sup>4</sup> | 186.93272  | 22.9511 |

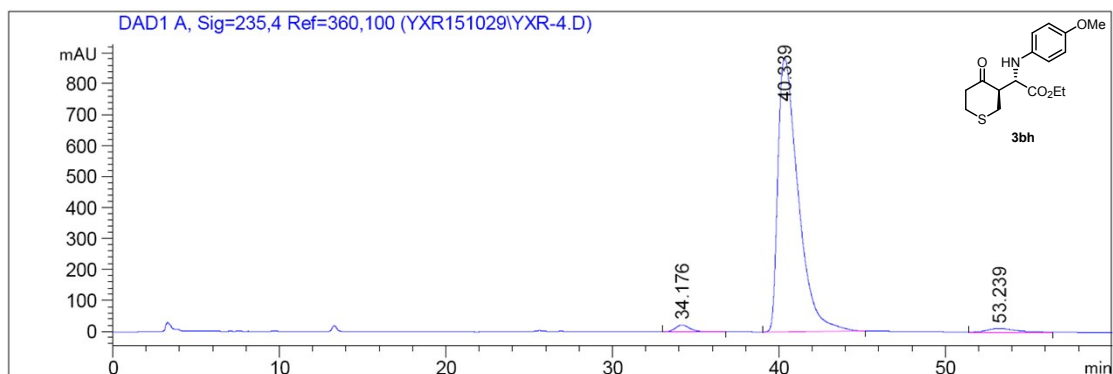

|   | Retention Time/min | Int Type | Width/min | Area/mAU              | Height/mAU | Area/%  |
|---|--------------------|----------|-----------|-----------------------|------------|---------|
| 1 | 34.176             | BB       | 0.8751    | 1316.94275            | 21.97821   | 1.7051  |
| 2 | 40.339             | BB       | 1.2372    | 7.47340e <sup>4</sup> | 885.00037  | 96.7596 |
| 3 | 53.239             | BB       | 1.2495    | 1185.83472            | 11.19790   | 1.5353  |

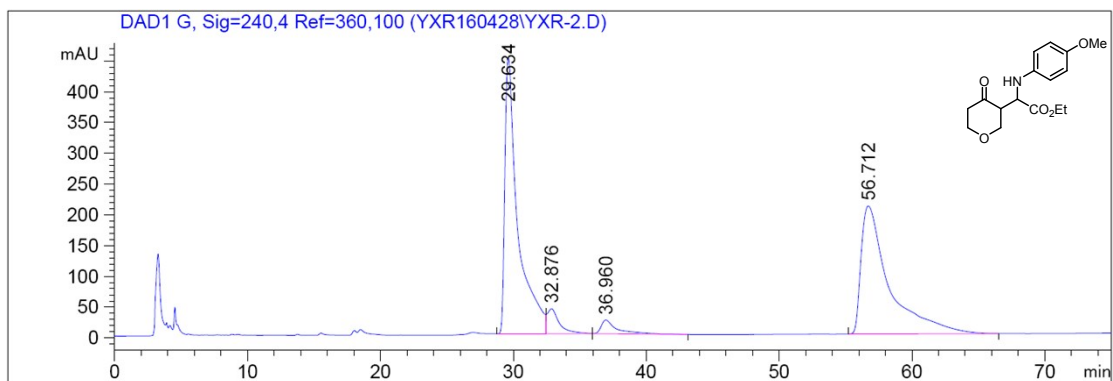

|   | Retention Time/min | Int Type | Width/min | Area/mAU              | Height/mAU | Area/%  |
|---|--------------------|----------|-----------|-----------------------|------------|---------|
| 1 | 29.634             | BV       | 0.9482    | 3.04396e <sup>4</sup> | 449.42856  | 46.6372 |
| 2 | 32.876             | VB       | 0.9044    | 2593.40723            | 40.42946   | 3.9734  |
| 3 | 36.960             | BB       | 1.1524    | 1837.30811            | 22.22762   | 2.8150  |
| 4 | 56.712             | BB       | 2.0763    | 3.03987e <sup>4</sup> | 207.85150  | 46.5744 |

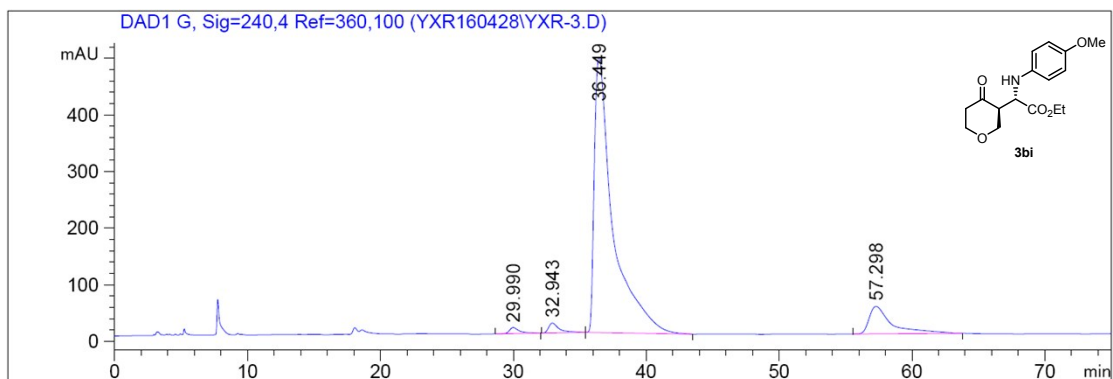

|   | Retention Time/min | Int Type | Width/min | Area/mAU              | Height/mAU | Area/%  |
|---|--------------------|----------|-----------|-----------------------|------------|---------|
| 1 | 29.990             | BB       | 0.7400    | 560.70203             | 10.68802   | 1.0288  |
| 2 | 32.943             | BB       | 0.7876    | 957.88342             | 17.25549   | 1.7575  |
| 3 | 36.449             | BB       | 1.3888    | 4.72089e <sup>4</sup> | 486.19116  | 86.6198 |
| 4 | 57.298             | BB       | 1.6553    | 5773.77881            | 48.55615   | 10.5939 |

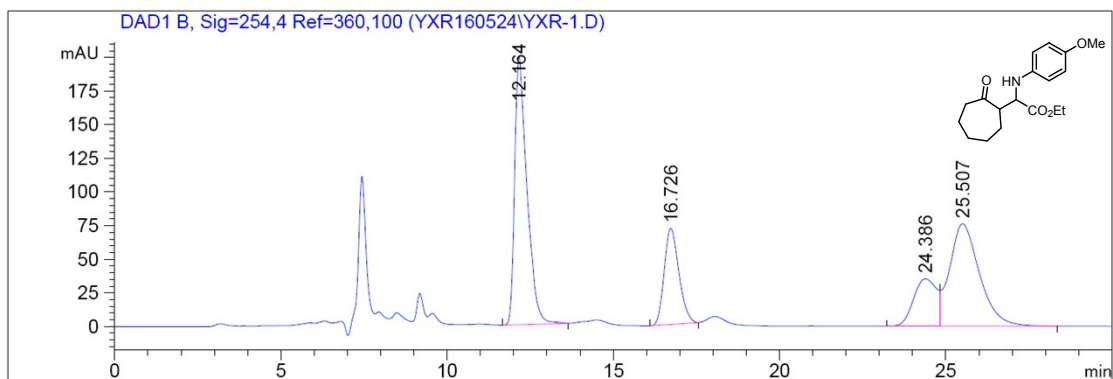

|   | Retention Time/min | Int Type | Width/min | Area/mAU   | Height/mAU | Area/%  |
|---|--------------------|----------|-----------|------------|------------|---------|
| 1 | 12.164             | BB       | 0.3730    | 5102.40283 | 199.11568  | 37.1276 |
| 2 | 16.726             | BB       | 0.4726    | 2189.35864 | 71.23458   | 15.9309 |
| 3 | 24.386             | BV       | 0.7386    | 1689.83105 | 35.16724   | 12.2960 |
| 4 | 25.507             | VB       | 0.9232    | 4761.29297 | 76.18205   | 34.6455 |

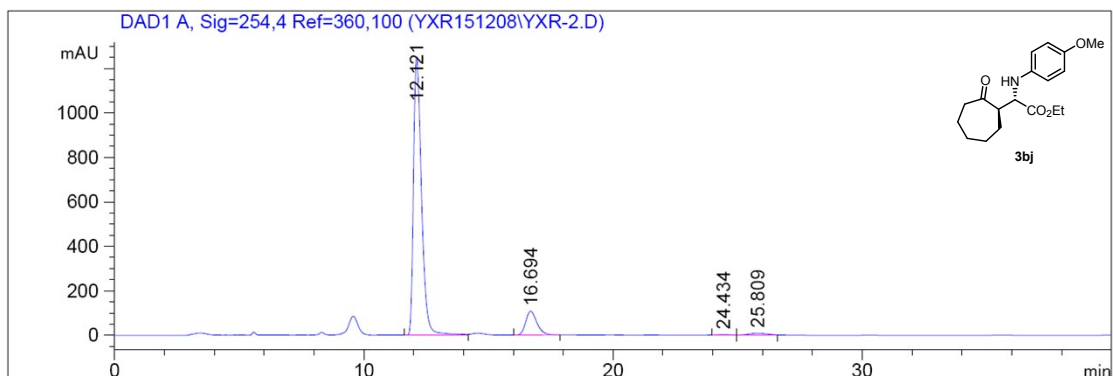

|   | Retention Time/min | Int Type | Width/min | Area/mAU              | Height/mAU | Area/%  |
|---|--------------------|----------|-----------|-----------------------|------------|---------|
| 1 | 12.121             | MF R     | 0.3739    | 2.80952e <sup>4</sup> | 1252.50073 | 88.1992 |
| 2 | 16.694             | BB       | 0.4777    | 3318.23315            | 107.01801  | 10.4169 |
| 3 | 24.434             | MF R     | 0.6341    | 53.63891              | 1.40994    | 0.1684  |
| 4 | 25.809             | FM R     | 0.8116    | 387.16287             | 7.95048    | 1.2154  |

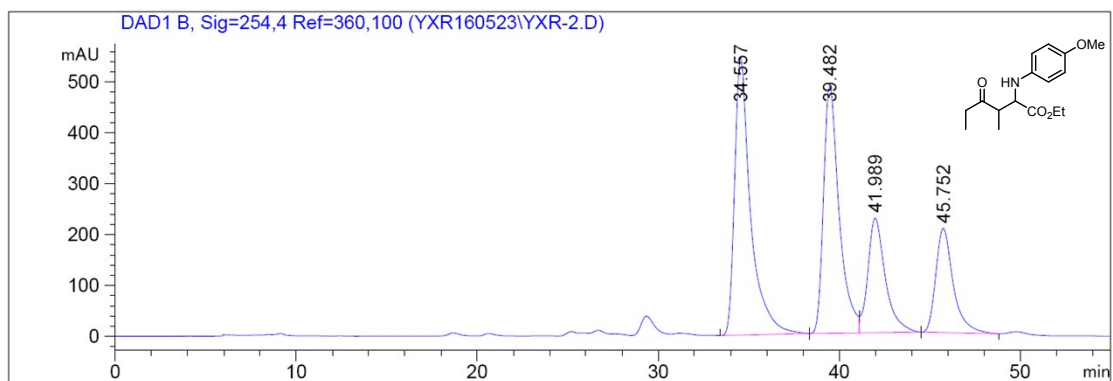

|   | Retention Time/min | Int Type | Width/min | Area/mAU              | Height/mAU | Area/%  |
|---|--------------------|----------|-----------|-----------------------|------------|---------|
| 1 | 34.557             | BB       | 0.9064    | 3.35524e <sup>4</sup> | 544.91943  | 36.5880 |
| 2 | 39.482             | BV       | 0.9024    | 2.92168e <sup>4</sup> | 486.63986  | 31.8602 |
| 3 | 41.989             | VB       | 1.0003    | 1.51804e <sup>4</sup> | 225.23358  | 16.5539 |
| 4 | 45.752             | BB       | 1.0047    | 1.37534e <sup>4</sup> | 204.99800  | 14.9978 |

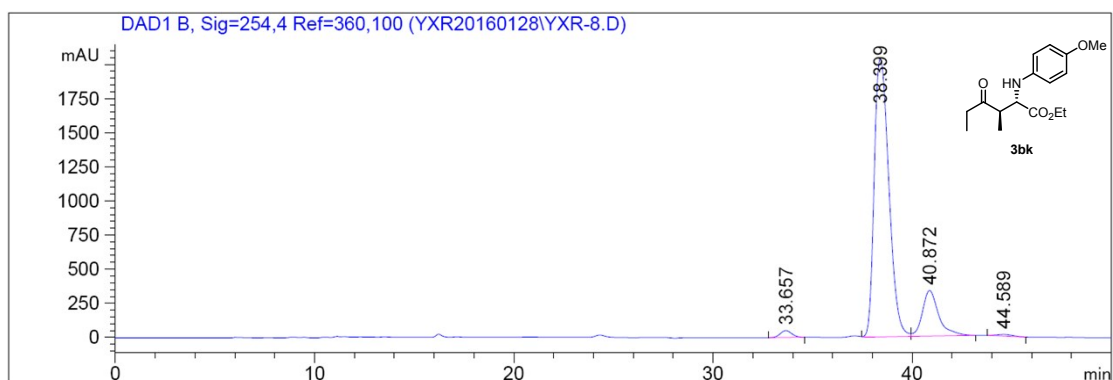

|   | Retention Time/min | Int Type | Width/min | Area/mAU              | Height/mAU | Area/%  |
|---|--------------------|----------|-----------|-----------------------|------------|---------|
| 1 | 33.657             | BB       | 0.6215    | 1988.54785            | 50.05849   | 1.5809  |
| 2 | 38.399             | VV       | 0.8043    | 1.04093e <sup>5</sup> | 2036.59534 | 82.7527 |
| 3 | 40.872             | VB       | 0.8611    | 1.90366e <sup>4</sup> | 333.90891  | 15.1339 |
| 4 | 44.589             | BB       | 0.7545    | 669.84338             | 12.63441   | 0.5235  |

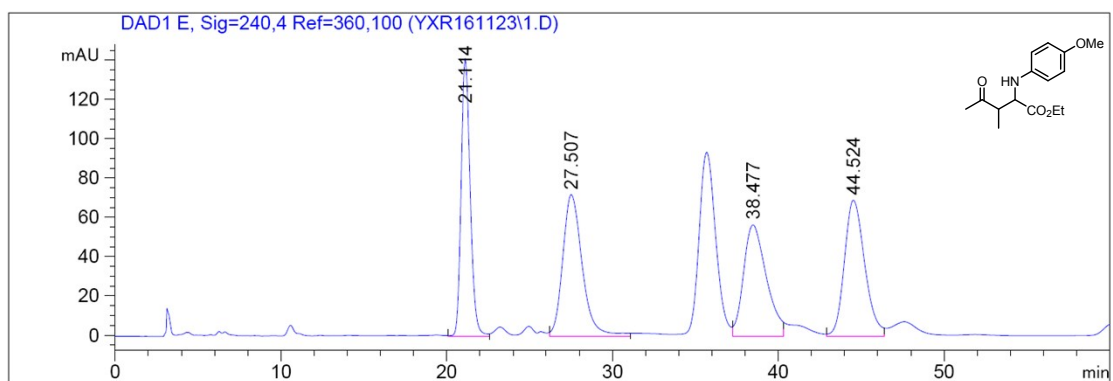

|   | Retention Time/min | Int Type | Width/min | Area/mAU   | Height/mAU | Area/%  |
|---|--------------------|----------|-----------|------------|------------|---------|
| 1 | 21.114             | MF R     | 0.6322    | 5360.86523 | 141.33614  | 23.7021 |
| 2 | 27.507             | MF R     | 1.3682    | 5916.61768 | 72.07486   | 26.1593 |
| 3 | 38.477             | MF R     | 1.5967    | 5425.45313 | 56.63126   | 23.9877 |
| 4 | 44.524             | MF R     | 1.4238    | 5914.70898 | 69.23727   | 26.1509 |

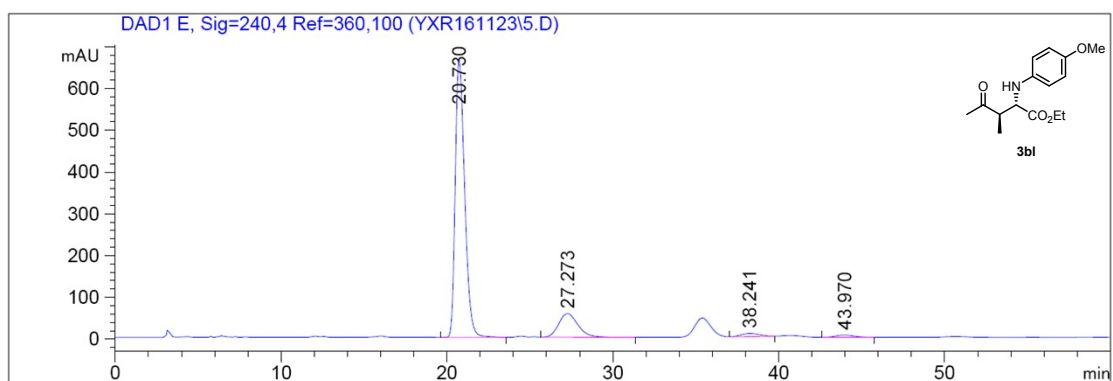

|   | Retention Time/min | Int Type | Width/min | Area/mAU              | Height/mAU | Area/%  |
|---|--------------------|----------|-----------|-----------------------|------------|---------|
| 1 | 20.730             | BB       | 0.6116    | 2.62418e <sup>4</sup> | 666.11707  | 82.4878 |
| 2 | 27.273             | BB       | 1.2075    | 4577.99561            | 56.48825   | 14.3903 |
| 3 | 38.241             | BB       | 0.9470    | 571.36035             | 7.46498    | 1.7960  |
| 4 | 43.970             | BB       | 0.9156    | 421.80060             | 5.50681    | 1.3259  |

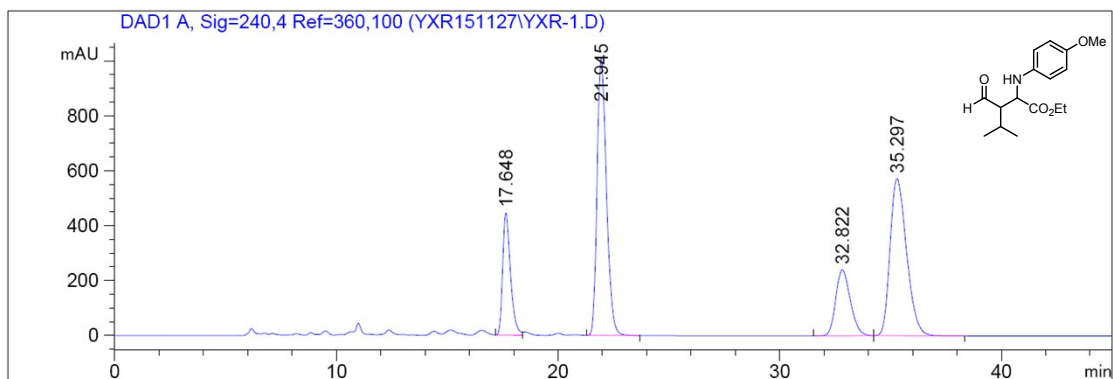

|   | Retention Time/min | Int Type | Width/min | Area/mAU              | Height/mAU | Area/%  |
|---|--------------------|----------|-----------|-----------------------|------------|---------|
| 1 | 17.648             | BV       | 0.3718    | 1.08852e <sup>4</sup> | 444.28430  | 13.4336 |
| 2 | 21.945             | BB       | 0.4511    | 2.96166e <sup>4</sup> | 1013.00366 | 36.5505 |
| 3 | 32.822             | BB       | 0.7038    | 1.09572e <sup>4</sup> | 240.39999  | 13.5226 |
| 4 | 35.297             | BB       | 0.8037    | 2.95702e <sup>4</sup> | 571.46484  | 36.4933 |

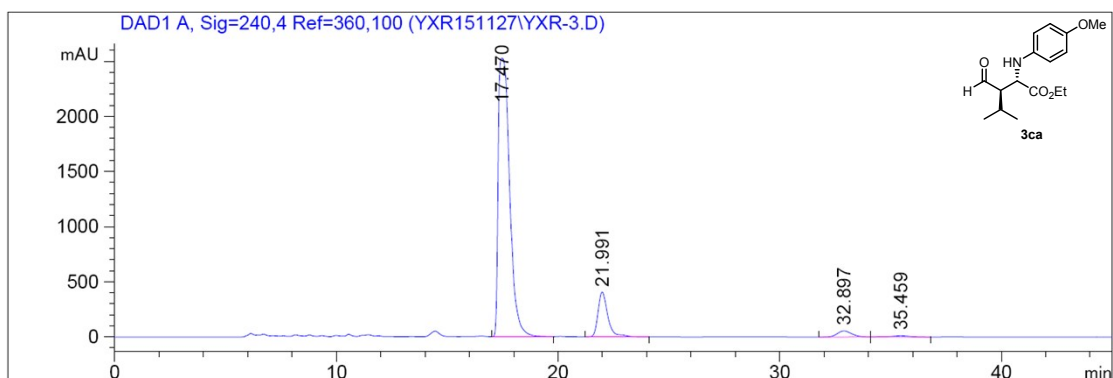

|   | Retention Time/min | Int Type | Width/min | Area/mAU              | Height/mAU | Area/%  |
|---|--------------------|----------|-----------|-----------------------|------------|---------|
| 1 | 17.470             | BB       | 0.5581    | 9.01669e <sup>4</sup> | 2528.09766 | 85.3092 |
| 2 | 21.991             | BB       | 0.4628    | 1.24572e <sup>4</sup> | 407.30743  | 11.7861 |
| 3 | 32.897             | BB       | 0.6859    | 2464.75391            | 55.09393   | 2.3320  |
| 4 | 35.459             | BB       | 0.8222    | 605.36023             | 10.50672   | 0.5727  |



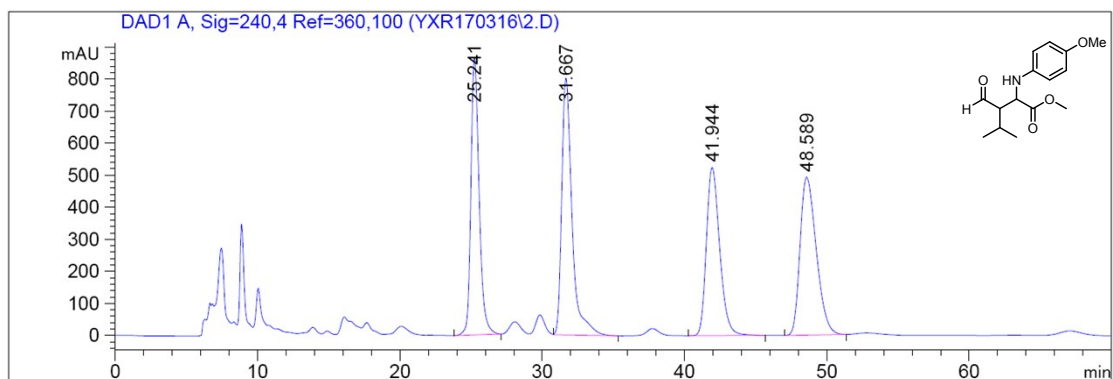

|   | Retention Time/min | Int Type | Width/min | Area/mAU              | Height/mAU | Area/%  |
|---|--------------------|----------|-----------|-----------------------|------------|---------|
| 1 | 25.241             | BB       | 0.6142    | 3.47554e <sup>4</sup> | 866.10376  | 23.4465 |
| 2 | 31.667             | VB       | 0.7582    | 4.03097e <sup>4</sup> | 802.22559  | 27.1936 |
| 3 | 41.944             | BB       | 1.0052    | 3.40443e <sup>4</sup> | 524.53552  | 22.9668 |
| 4 | 48.589             | BB       | 1.2328    | 3.91230e <sup>4</sup> | 493.54095  | 26.3930 |

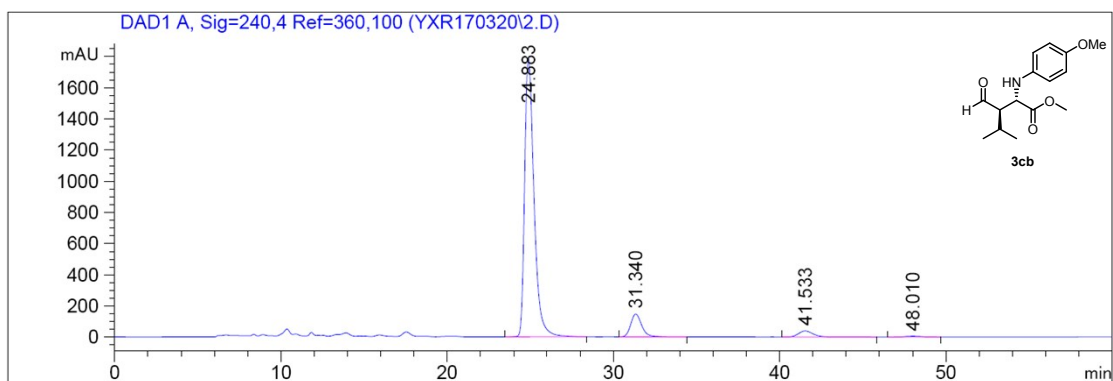

|   | Retention Time/min | Int Type | Width/min | Area/mAU              | Height/mAU | Area/%  |
|---|--------------------|----------|-----------|-----------------------|------------|---------|
| 1 | 24.883             | BB       | 0.5963    | 6.99500e <sup>4</sup> | 1788.46643 | 87.8430 |
| 2 | 31.340             | BB       | 0.7060    | 6774.89551            | 146.38429  | 8.5079  |
| 3 | 41.533             | BB       | 0.9651    | 2509.70947            | 39.19138   | 3.1517  |
| 4 | 48.010             | BB       | 0.9227    | 396.10971             | 5.81494    | 0.4974  |

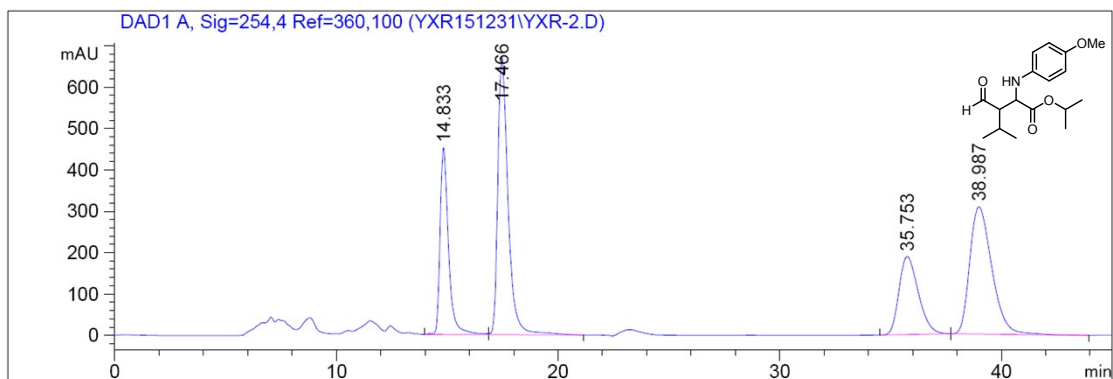

|   | Retention Time/min | Int Type | Width/min | Area/mAU              | Height/mAU | Area/%  |
|---|--------------------|----------|-----------|-----------------------|------------|---------|
| 1 | 14.833             | BV       | 0.4010    | 1.20353e <sup>4</sup> | 451.46768  | 18.1203 |
| 2 | 17.466             | VB       | 0.4887    | 2.16535e <sup>4</sup> | 670.53845  | 32.6014 |
| 3 | 35.753             | BB       | 0.9395    | 1.14152e <sup>4</sup> | 188.23247  | 17.1866 |
| 4 | 38.987             | BB       | 1.0810    | 2.13150e <sup>4</sup> | 307.39700  | 32.0916 |

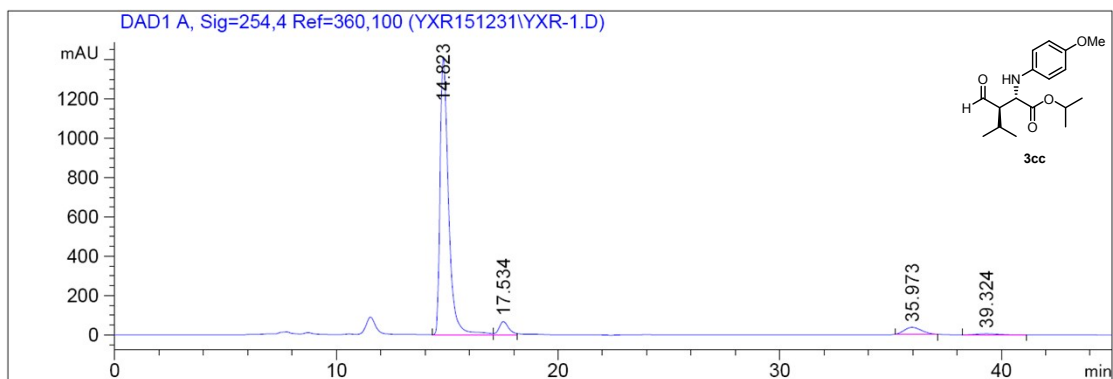

|   | Retention Time/min | Int Type | Width/min | Area/mAU              | Height/mAU | Area/%  |
|---|--------------------|----------|-----------|-----------------------|------------|---------|
| 1 | 14.823             | MF R     | 0.4412    | 3.74419e <sup>4</sup> | 1414.39063 | 89.7067 |
| 2 | 17.534             | MF R     | 0.4961    | 1996.02722            | 67.05069   | 4.7823  |
| 3 | 35.973             | MM R     | 0.9074    | 1960.50195            | 36.00914   | 4.6971  |
| 4 | 39.324             | BB       | 0.7702    | 339.70831             | 5.61233    | 0.8139  |

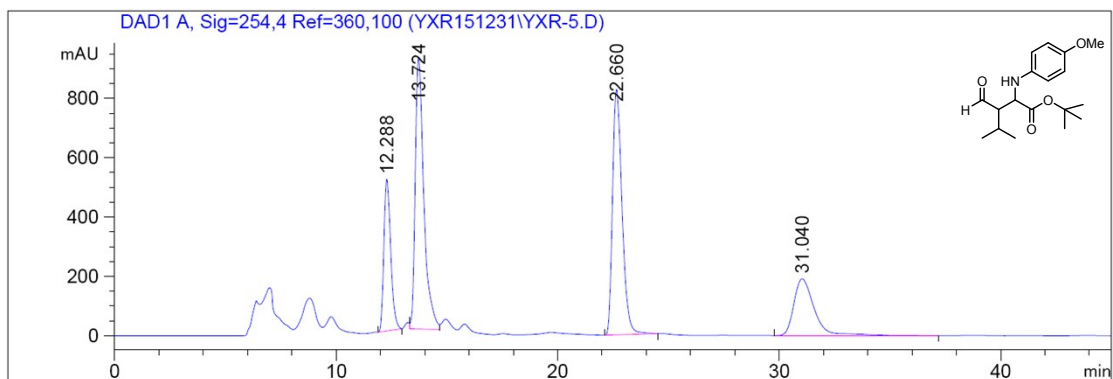

|   | Retention Time/min | Int Type | Width/min | Area/mAU              | Height/mAU | Area/%  |
|---|--------------------|----------|-----------|-----------------------|------------|---------|
| 1 | 12.288             | BB       | 0.3344    | 1.09861e <sup>4</sup> | 511.85443  | 15.1159 |
| 2 | 13.724             | VV       | 0.4107    | 2.47410e <sup>4</sup> | 917.09949  | 34.0413 |
| 3 | 22.660             | BB       | 0.4622    | 2.47007e <sup>4</sup> | 827.62939  | 33.9859 |
| 4 | 31.040             | BB       | 0.9701    | 1.22515e <sup>4</sup> | 191.06065  | 16.8570 |

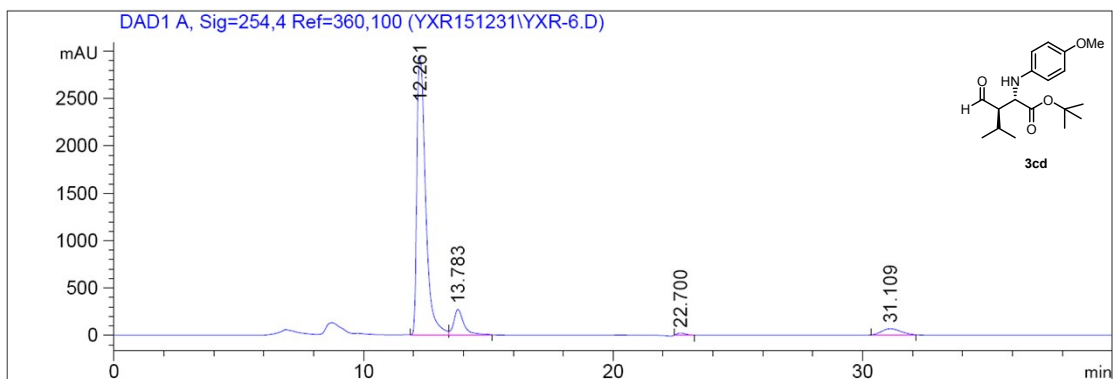

|   | Retention Time/min | Int Type | Width/min | Area/mAU              | Height/mAU | Area/%  |
|---|--------------------|----------|-----------|-----------------------|------------|---------|
| 1 | 12.261             | MF R     | 0.4083    | 7.19143e <sup>4</sup> | 2935.41431 | 86.0325 |
| 2 | 13.783             | FM R     | 0.4611    | 7424.39697            | 268.37338  | 8.8820  |
| 3 | 22.700             | MM R     | 0.4060    | 534.99725             | 21.96223   | 0.6400  |
| 4 | 31.109             | MM R     | 0.9132    | 3715.96973            | 67.82070   | 4.4455  |

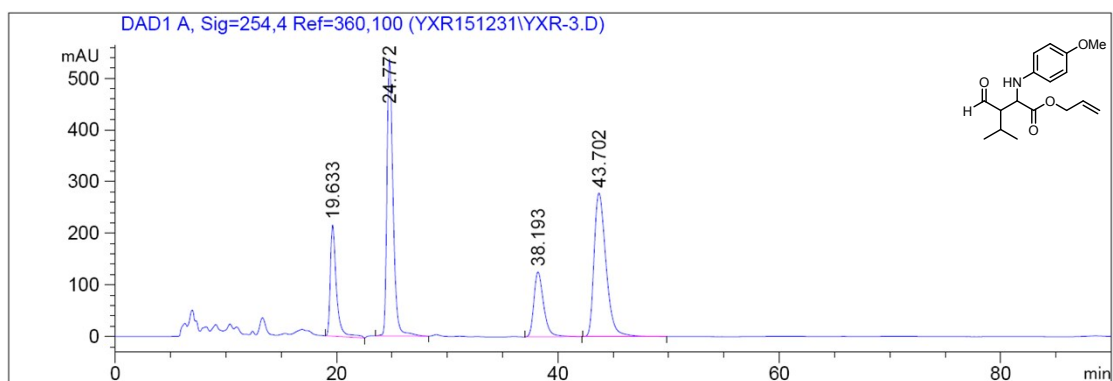

|   | Retention Time/min | Int Type | Width/min | Area/mAU              | Height/mAU | Area/%  |
|---|--------------------|----------|-----------|-----------------------|------------|---------|
| 1 | 19.633             | BB       | 0.5727    | 8279.87891            | 215.26515  | 14.4218 |
| 2 | 24.772             | BB       | 0.5915    | 2.06474e <sup>4</sup> | 535.90051  | 35.9635 |
| 3 | 38.193             | BB       | 0.9304    | 7684.16943            | 125.49399  | 13.3842 |
| 4 | 43.702             | BB       | 1.1423    | 2.08007e <sup>4</sup> | 278.21027  | 36.2304 |

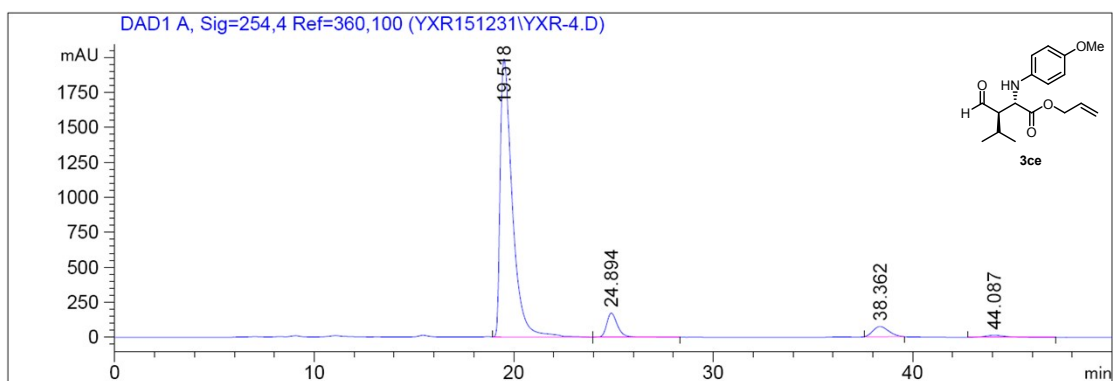

|   | Retention Time/min | Int Type | Width/min | Area/mAU              | Height/mAU | Area/%  |
|---|--------------------|----------|-----------|-----------------------|------------|---------|
| 1 | 19.518             | VB       | 0.6391    | 8.44005e <sup>4</sup> | 1988.81921 | 88.0223 |
| 2 | 24.894             | BB       | 0.5724    | 6476.83154            | 172.36227  | 6.7548  |
| 3 | 38.362             | MM R     | 0.9131    | 4014.01587            | 73.26868   | 4.1863  |
| 4 | 44.087             | BB       | 0.9459    | 993.95544             | 14.56937   | 1.0366  |

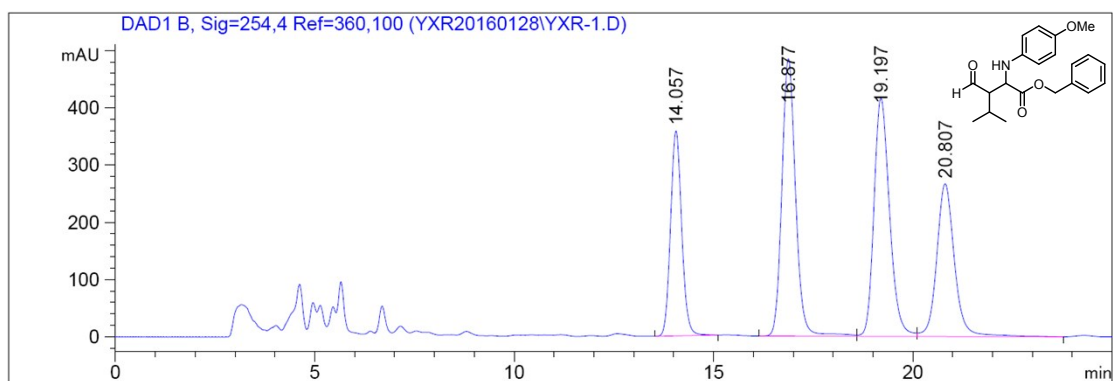

|   | Retention Time/min | Int Type | Width/min | Area/mAU              | Height/mAU | Area/%  |
|---|--------------------|----------|-----------|-----------------------|------------|---------|
| 1 | 14.057             | BB       | 0.3005    | 6954.87695            | 358.19519  | 18.2592 |
| 2 | 16.877             | BV       | 0.3689    | 1.15851e <sup>4</sup> | 484.64444  | 30.4154 |
| 3 | 19.197             | VV       | 0.4188    | 1.13005e <sup>4</sup> | 416.11356  | 29.6681 |
| 4 | 20.807             | VB       | 0.4707    | 8249.18262            | 266.80841  | 21.6573 |

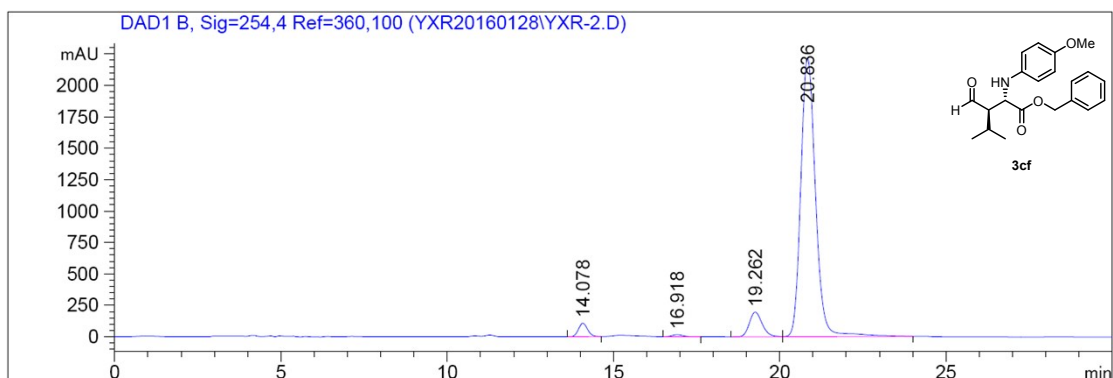

|   | Retention Time/min | Int Type | Width/min | Area/mAU              | Height/mAU | Area/%  |
|---|--------------------|----------|-----------|-----------------------|------------|---------|
| 1 | 14.078             | BB       | 0.2949    | 2042.05493            | 106.88641  | 2.6886  |
| 2 | 16.918             | BB       | 0.3515    | 358.49493             | 15.75256   | 0.4720  |
| 3 | 19.262             | BV       | 0.4144    | 5257.88232            | 196.37361  | 6.9226  |
| 4 | 20.836             | VB       | 0.4752    | 6.82937e <sup>4</sup> | 2218.31885 | 89.9168 |

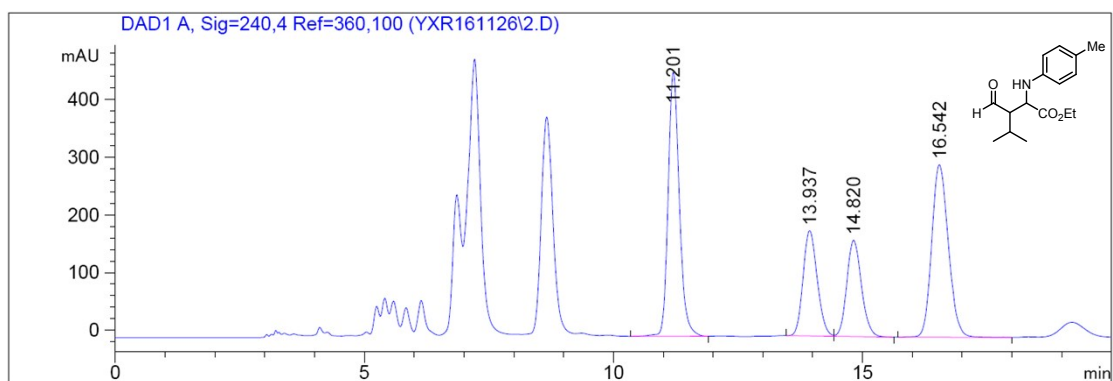

|   | Retention Time/min | Int Type | Width/min | Area/mAU   | Height/mAU | Area/%  |
|---|--------------------|----------|-----------|------------|------------|---------|
| 1 | 11.201             | BB       | 0.2403    | 7154.60107 | 457.96786  | 33.8876 |
| 2 | 13.937             | BV       | 0.3064    | 3605.89282 | 182.59789  | 17.0792 |
| 3 | 14.820             | VB       | 0.3167    | 3412.01294 | 166.73230  | 16.1609 |
| 4 | 16.542             | BB       | 0.3607    | 6940.23975 | 299.14990  | 32.8723 |

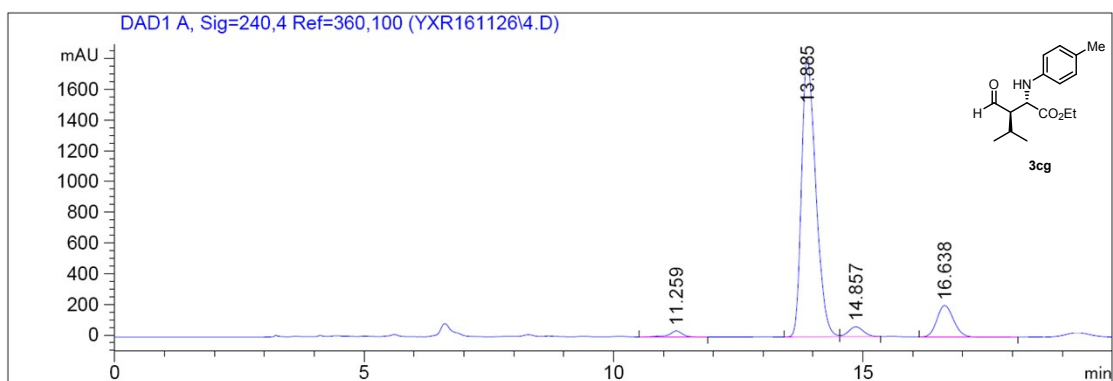

|   | Retention Time/min | Int Type | Width/min | Area/mAU              | Height/mAU | Area/%  |
|---|--------------------|----------|-----------|-----------------------|------------|---------|
| 1 | 11.259             | BB       | 0.2708    | 717.14404             | 38.95102   | 1.6706  |
| 2 | 13.885             | BV       | 0.3068    | 3.61346e <sup>4</sup> | 1810.72339 | 84.1768 |
| 3 | 14.857             | VB       | 0.3191    | 1310.84460            | 63.97268   | 3.0537  |
| 4 | 16.638             | BB       | 0.3629    | 4764.43506            | 205.22018  | 11.0989 |

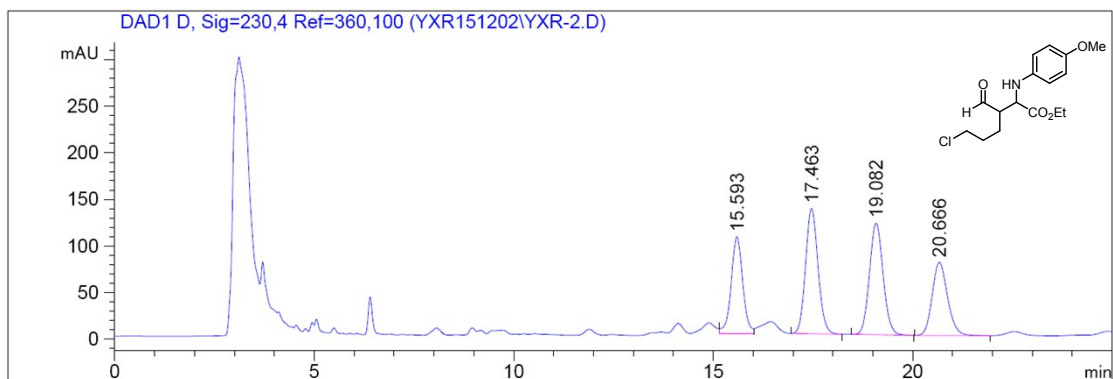

|   | Retention Time/min | Int Type | Width/min | Area/mAU   | Height/mAU | Area/%  |
|---|--------------------|----------|-----------|------------|------------|---------|
| 1 | 15.593             | VV       | 0.3087    | 2091.79053 | 103.95885  | 20.9560 |
| 2 | 17.463             | BB       | 0.3376    | 2932.06201 | 134.90128  | 29.3740 |
| 3 | 19.082             | BB       | 0.3676    | 2854.22656 | 119.93543  | 28.5943 |
| 4 | 20.666             | BB       | 0.4122    | 2103.73975 | 78.61732   | 21.0757 |

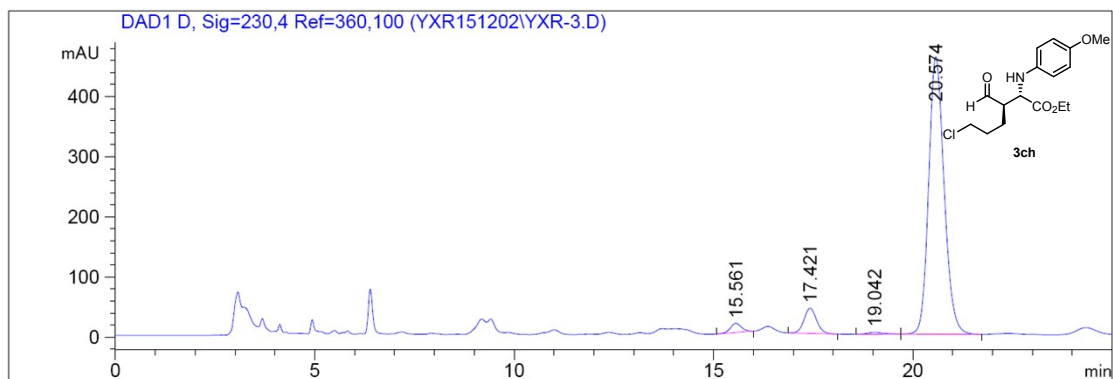

|   | Retention Time/min | Int Type | Width/min | Area/mAU              | Height/mAU | Area/%  |
|---|--------------------|----------|-----------|-----------------------|------------|---------|
| 1 | 15.561             | BB       | 0.2964    | 290.55994             | 15.10630   | 2.1108  |
| 2 | 17.421             | BB       | 0.3375    | 922.51965             | 42.12090   | 6.7017  |
| 3 | 19.042             | BB       | 0.3956    | 86.58823              | 3.14083    | 0.6290  |
| 4 | 20.574             | BB       | 0.4171    | 1.24658e <sup>4</sup> | 461.57147  | 90.5585 |

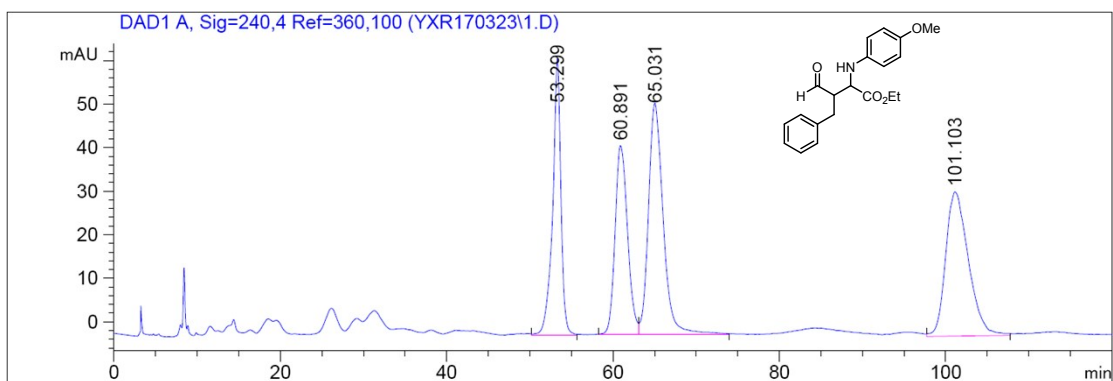

|   | Retention Time/min | Int Type | Width/min | Area/mAU   | Height/mAU | Area/%  |
|---|--------------------|----------|-----------|------------|------------|---------|
| 1 | 53.299             | MM R     | 1.1543    | 4411.81494 | 63.70360   | 20.3183 |
| 2 | 60.891             | MF R     | 1.7331    | 4499.79102 | 43.27388   | 20.7235 |
| 3 | 65.031             | FM R     | 2.0427    | 6501.97510 | 53.04926   | 29.9444 |
| 4 | 101.103            | MM R     | 3.1680    | 6299.92383 | 33.14325   | 29.0139 |

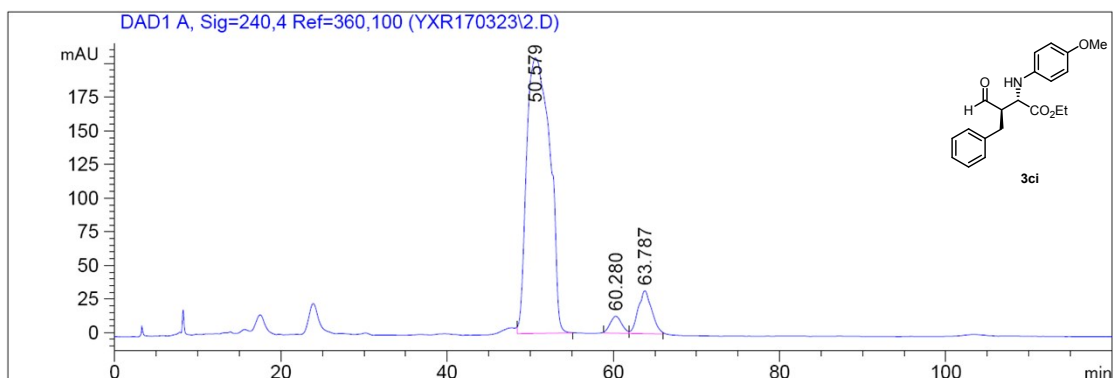

|   | Retention Time/min | Int Type | Width/min | Area/mAU              | Height/mAU | Area/%  |
|---|--------------------|----------|-----------|-----------------------|------------|---------|
| 1 | 50.579             | FM R     | 3.2235    | 3.96297e <sup>4</sup> | 204.90135  | 89.1826 |
| 2 | 60.280             | FM R     | 1.6065    | 1210.88635            | 12.56210   | 2.7250  |
| 3 | 63.787             | MF R     | 1.8832    | 3596.01245            | 31.82486   | 8.0925  |





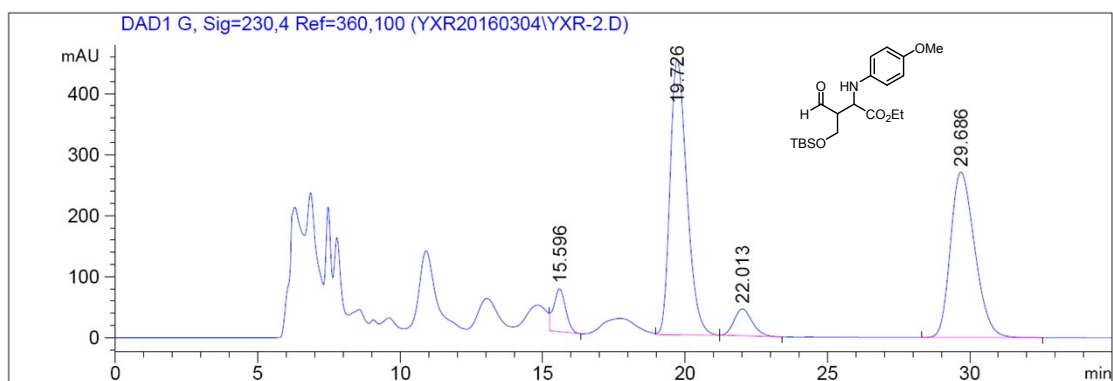

|   | Retention Time/min | Int Type | Width/min | Area/mAU              | Height/mAU | Area/%  |
|---|--------------------|----------|-----------|-----------------------|------------|---------|
| 1 | 15.596             | VB       | 0.4378    | 2055.46509            | 70.15833   | 5.3298  |
| 2 | 19.726             | VB       | 0.6325    | 1.85352e <sup>4</sup> | 451.89056  | 48.0617 |
| 3 | 22.013             | BB       | 0.6898    | 1942.72620            | 43.94114   | 5.0375  |
| 4 | 29.686             | BB       | 0.9158    | 1.60320e <sup>4</sup> | 271.16983  | 41.5710 |

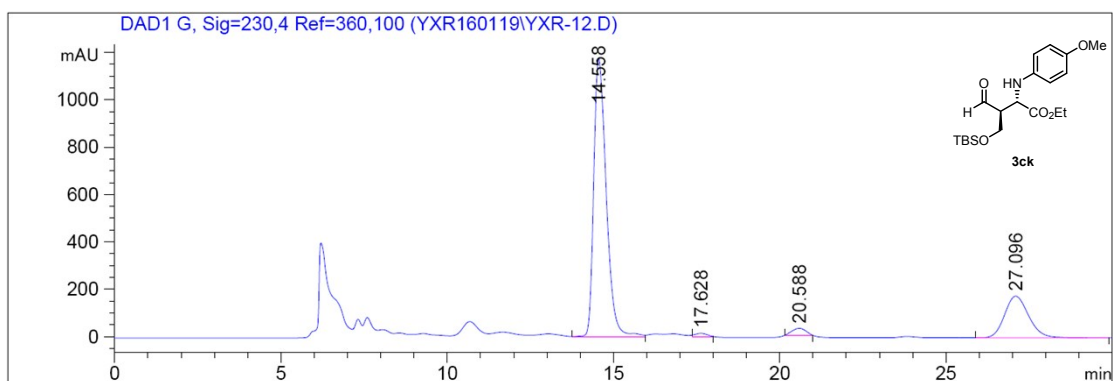

|   | Retention Time/min | Int Type | Width/min | Area/mAU              | Height/mAU | Area/%  |
|---|--------------------|----------|-----------|-----------------------|------------|---------|
| 1 | 14.558             | MF R     | 0.4362    | 3.06998e <sup>4</sup> | 1173.04321 | 75.2464 |
| 2 | 17.628             | FM R     | 0.4134    | 354.43451             | 14.29054   | 0.8687  |
| 3 | 20.588             | MM R     | 0.4859    | 872.95905             | 29.94078   | 2.1397  |
| 4 | 27.096             | BB       | 0.7783    | 8871.82520            | 175.92526  | 21.7452 |

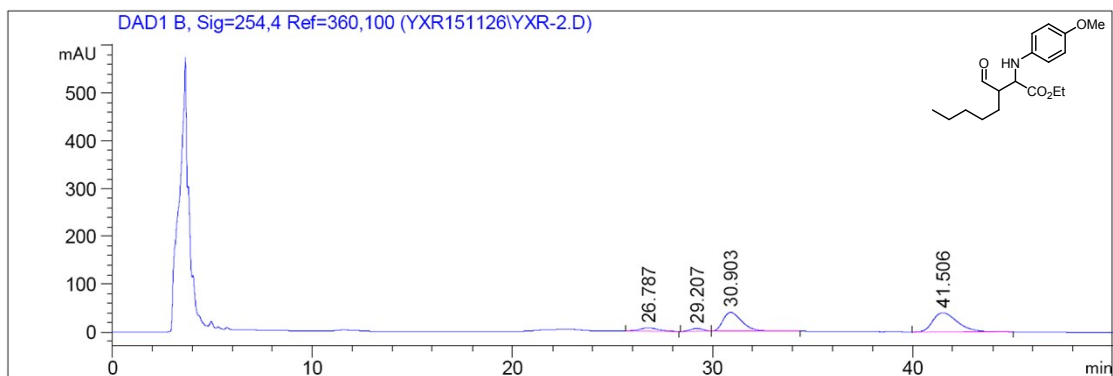

|   | Retention Time/min | Int Type | Width/min | Area/mAU   | Height/mAU | Area/%  |
|---|--------------------|----------|-----------|------------|------------|---------|
| 1 | 26.787             | BB       | 0.7741    | 382.03259  | 6.45869    | 5.8247  |
| 2 | 29.207             | BB       | 0.6279    | 238.90668  | 5.57558    | 3.6425  |
| 3 | 30.903             | BB       | 0.9948    | 2549.32129 | 38.88758   | 38.8687 |
| 4 | 41.506             | BB       | 1.2647    | 3388.54419 | 39.58606   | 51.6641 |

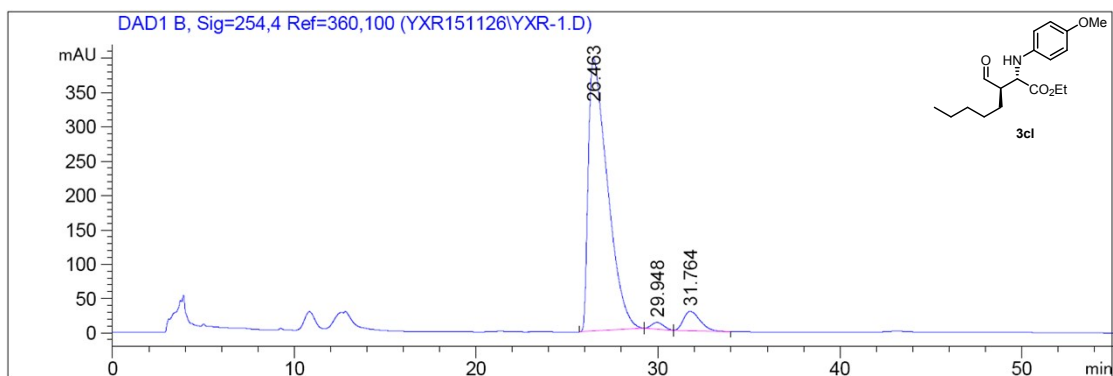

|   | Retention Time/min | Int Type | Width/min | Area/mAU              | Height/mAU | Area/%  |
|---|--------------------|----------|-----------|-----------------------|------------|---------|
| 1 | 26.463             | BB       | 1.0577    | 2.91513e <sup>4</sup> | 397.44064  | 93.0004 |
| 2 | 29.948             | BB       | 0.6991    | 429.46948             | 9.54183    | 1.3701  |
| 3 | 31.764             | BB       | 0.9675    | 1764.58728            | 27.83780   | 5.6295  |

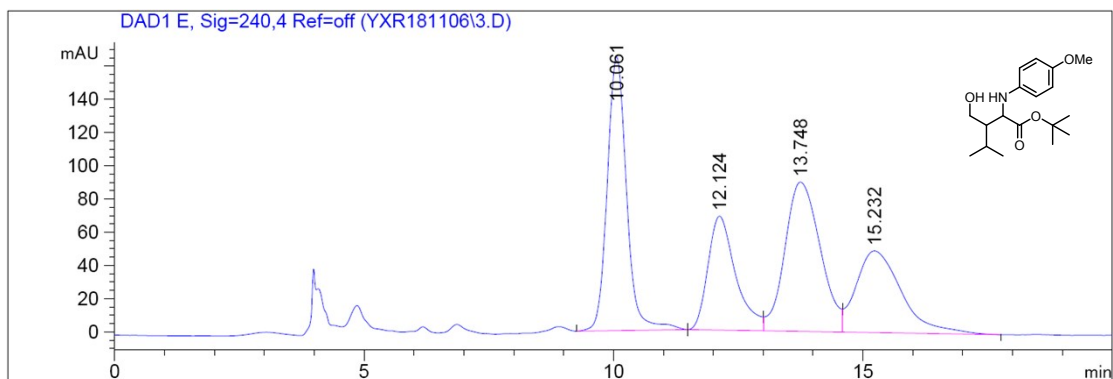

|   | Retention Time/min | Int Type | Width/min | Area/mAU   | Height/mAU | Area/%  |
|---|--------------------|----------|-----------|------------|------------|---------|
| 1 | 10.061             | BB       | 0.4172    | 4454.04932 | 164.87741  | 30.3695 |
| 2 | 12.124             | BV       | 0.5837    | 2656.24951 | 68.60130   | 18.1114 |
| 3 | 13.748             | VV       | 0.7789    | 4445.57373 | 89.90759   | 30.3117 |
| 4 | 15.232             | VB       | 0.9873    | 3110.31396 | 49.21550   | 21.2074 |

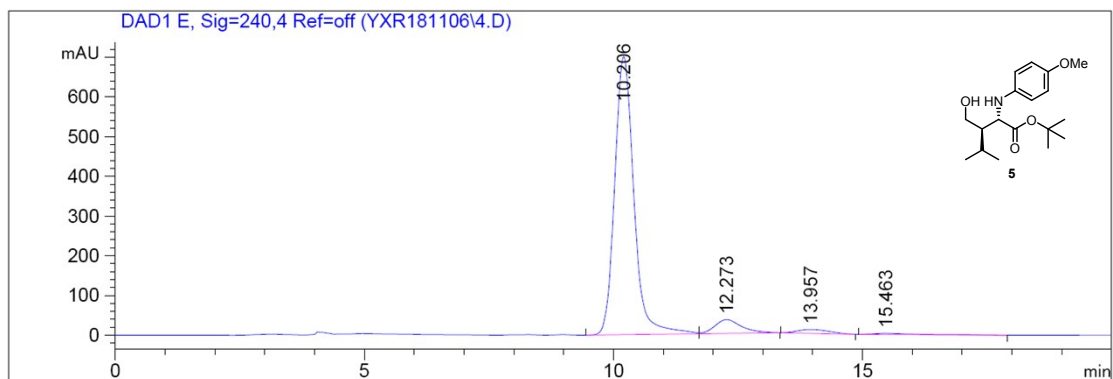

|   | Retention Time/min | Int Type | Width/min | Area/mAU              | Height/mAU | Area/%  |
|---|--------------------|----------|-----------|-----------------------|------------|---------|
| 1 | 10.206             | BV       | 0.4150    | 1.87742e <sup>4</sup> | 699.89307  | 90.8499 |
| 2 | 12.273             | VB       | 0.5567    | 1286.45703            | 34.68915   | 6.2253  |
| 3 | 13.957             | BB       | 0.7069    | 426.62372             | 9.66650    | 2.0645  |
| 4 | 15.463             | BBA      | 0.7450    | 177.78607             | 3.08218    | 0.8603  |

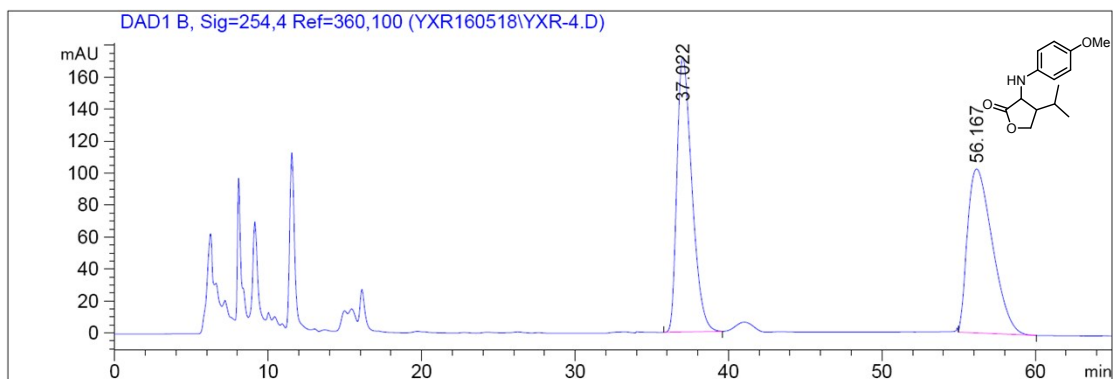

|   | Retention Time/min | Int Type | Width/min | Area/mAU              | Height/mAU | Area/%  |
|---|--------------------|----------|-----------|-----------------------|------------|---------|
| 1 | 37.022             | BB       | 1.0490    | 1.16840e <sup>4</sup> | 171.90237  | 50.2139 |
| 2 | 56.167             | BB       | 1.6352    | 1.15845e <sup>4</sup> | 102.60422  | 49.7861 |

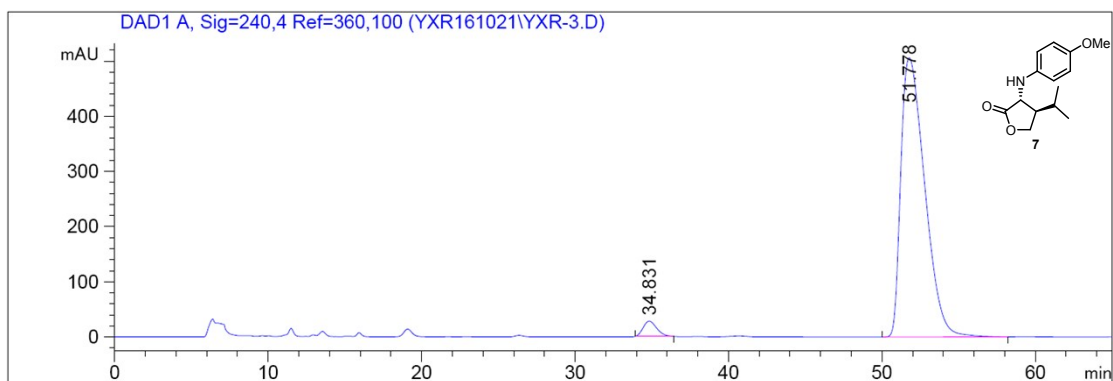

|   | Retention Time/min | Int Type | Width/min | Area/mAU              | Height/mAU | Area/%  |
|---|--------------------|----------|-----------|-----------------------|------------|---------|
| 1 | 34.831             | MM R     | 1.0239    | 1703.48706            | 27.72922   | 3.0233  |
| 2 | 51.778             | BB       | 1.6958    | 5.46412e <sup>4</sup> | 505.99783  | 96.9767 |
